# Supplementary material for: Community health promotion and medical provision for neonatal health—CHAMPION cluster randomised trial in Nagarkurnool district, Telangana (formerly Andhra Pradesh), India
Source: PLoS Med. 2017 Jul 5;14(7):e1002324. doi: 10.1371/journal.pmed.1002324 (PMC5497957; doi:10.1371/journal.pmed.1002324)
Supplement: S1 Data — (XLS) [file pmed.1002324.s001.xls]

## Sheet: csvFilesDictionary
MEMNAME	NAME	TYPE	LENGTH	LABEL	FORMAT
FCHARTCHILDREN	Village_Id	Num	8	Village_Id	1,2,...,464
FCHARTCHILDREN	Womens_ID	Num	8	Womens_ID
FCHARTCHILDREN	MonthlyID	Num	8	MonthlyID
FCHARTCHILDREN	MultipleKey	Num	8	Order multiple births	1,2,3
FCHARTCHILDREN	arm	Num	8	Arm	0='Control' 1='Intervention'
FCHARTCHILDREN	born	Num	8	Indicator born	0='No' 1='Yes'
FCHARTCHILDREN	ind6months	Num	8	EDD (expected delivery date) on or after ASD (assessment start date)	0='No' 1='Yes'
FCHARTCHILDREN	liveborn	Num	8	Indicator liveborn	0='No' 1='Yes'
FCHARTPREGS	Village_Id	Num	8	Village_Id	1,2,...,464
FCHARTPREGS	Womens_ID	Num	8	Womens_ID
FCHARTPREGS	MonthlyID	Num	8	MonthlyID
FCHARTPREGS	arm	Num	8	Arm	0='Control' 1='Intervention'
FCHARTPREGS	AnalysisPopulation	Num	8	Confirmed pregnancy with EDD on or after ASD and at least one live birth	0='No' 1='Yes'
FCHARTPREGS	ind6months	Num	8	EDD (expected delivery date) on or after ASD (assessment start date)	0='No' 1='Yes'
FCHARTWOMEN	Village_Id	Num	8	Village_Id	1,2,...,464
FCHARTWOMEN	Womens_ID	Num	8	Womens_ID
FCHARTWOMEN	arm	Num	8	Arm	0='Control' 1='Intervention'
FCHARTWOMEN	ind6months	Num	8	EDD (expected delivery date) on or after ASD (assessment start date) for at least one birth	0='No' 1='Yes'
FCHARTWOMEN	nbirths	Num	8	Number of births	Number
TABLE1A	Village_Id	Num	8	Village_Id	1,2,...,464
TABLE1A	arm	Num	8	Arm	0='Control' 1='Intervention'
TABLE1A	VillageType	Num	8	Village type	1='Non-tribal' 2='Penta' 3='Thanda'
TABLE1A	traveltime	Num	8	Travel time	1='< 60 minutes' 2='> 60 minutes'
TABLE1BFIRSTPART	Village_Id	Num	8	Village_Id	1,2,...,464
TABLE1BFIRSTPART	Womens_ID	Num	8	Womens_ID
TABLE1BFIRSTPART	arm	Num	8	Arm	0='Control' 1='Intervention'
TABLE1BFIRSTPART	Age	Num	8	Age	Years
TABLE1BFIRSTPART	BirthsInTheLastYear	Num	8	Births in the last year	Number
TABLE1BFIRSTPART	PreviousMiscarriage	Num	8	Ever had miscarriage	0='No' 1='Yes'
TABLE1BFIRSTPART	NeonatalDeathsInLastYear	Num	8	NeonatalDeathsInLastYear	0='No' 1='Yes'
TABLE1BFIRSTPART	SchoolYearsWoman	Num	8		Years
TABLE1BFIRSTPART	SchoolYearsHusband	Num	8		Years
TABLE1BFIRSTPART	ind6months	Num	8	Indicator EED	0='No' 1='Yes'
TABLE1BFIRSTPART	nbirths	Num	8	Number of births	Number
TABLE1BMULTIPLE	Village_Id	Num	8	Village_Id	1,2,...,464
TABLE1BMULTIPLE	Womens_ID	Num	8	Womens_ID
TABLE1BMULTIPLE	MonthlyID	Num	8	MonthlyID
TABLE1BMULTIPLE	arm	Num	8	Arm	0='Control' 1='Intervention'
TABLE1BMULTIPLE	nbabies	Num	8	Number of babies	Number
TABLE1BSEX	Village_Id	Num	8	Village_Id	1,2,...,464
TABLE1BSEX	Womens_ID	Num	8	Womens_ID
TABLE1BSEX	MonthlyID	Num	8	MonthlyID
TABLE1BSEX	MultipleKey	Num	8	Order multiple births	1,2,3
TABLE1BSEX	arm	Num	8	Arm	0='Control' 1='Intervention'
TABLE1BSEX	ChildGender	Num	8	ChildGender	1='Male' 2='Female'
TABLE2BOTTOM	Village_Id	Num	8	Village_Id	1,2,...,464
TABLE2BOTTOM	Womens_ID	Num	8	Womens_ID
TABLE2BOTTOM	MonthlyID	Num	8	MonthlyID
TABLE2BOTTOM	arm	Num	8	Arm	0='Control' 1='Intervention'
TABLE2BOTTOM	AgeOfDeath	Num	8	AgeOfDeath	Days
TABLE2BOTTOM	CauseOfDeath	Num	8	CauseOfDeath	1='Congenital anomalies' 2='Multiple births' 3='Maternal disease' 4='Specific fetal conditions' 5='Unexplained small for date infant' 6='Placental abruption' 7='Obstetric complications' 8='Unexplained antepartum stillbirth <37 gestational weeks' 9='Unexplained antepartum stillbirth >37 gestational
TABLE2BOTTOM	ChildGender	Num	8	ChildGender	1='Male' 2='Female'
TABLE2TOP	Village_Id	Num	8	Village_Id	1,2,...,464
TABLE2TOP	Womens_ID	Num	8	Womens_ID
TABLE2TOP	MonthlyID	Num	8	MonthlyID
TABLE2TOP	arm	Num	8	Arm	0='Control' 1='Intervention'
TABLE2TOP	perinatmort_VA	Num	8	Perinatal mortality from VA	1='Dead at birth or pregnancy loss' 2='Neonatal death' 3='Not neonatal death' 4='Alive' 8='Age at death not informed' 9='Child birth status not informed
TABLE3	Village_Id	Num	8	Village_Id	1,2,...,464
TABLE3	Womens_ID	Num	8	Womens_ID
TABLE3	MonthlyID	Num	8	MonthlyID
TABLE3	arm	Num	8	Arm	0='Control' 1='Intervention'
TABLE3	BaselineEntry	Num	8	BaselineEntry	0='New' 1='Baseline'
TABLE3	VillageType	Num	8	Village type	1='Non-tribal' 2='Penta' 3='Thanda'
TABLE3	traveltime	Num	8	Travelling time to NPHC	1='< 60 minutes' 2='> 60 minutes'
TABLE3	neonatmort	Num	8	Neonatal mortality	0='No' 1='Yes'
TABLE3	stripes	Num	8	Indicator of inclusion in STRIPES	0='No' 1='Yes'
TABLE4	Village_Id	Num	8	Village_Id	1,2,...,464
TABLE4	Womens_ID	Num	8	Womens_ID
TABLE4	MonthlyID	Num	8	MonthlyID
TABLE4	arm	Num	8	Arm	0='Control' 1='Intervention'
TABLE4	maternaldeath	Num	8	Maternal death	0='No' 1='Yes'
TABLE4	CauseOfDeath	Num	8	CauseOfDeath	1='Haemorrhage' 2='Sepsis' 3='Hypertensive disorders' 4='Obstructed labour' 5='Abortion' 6='Other pregnancy-related conditions' 7='Traffic accident' 8='Other accident/injury not related to pregnancy' 9='Suicide' 10='Illness not related to pregnancy' 11='Unknown' 99='No data' 12='Non-pregnant not-maternal death' .='Not informed'
Table5_risk_Symptoms_For_Neonates	arm	Num		Arm	0='Control' 1='Intervention'
Table5_risk_Symptoms_For_Neonates	Village_Id	Num		Village_Id	1,2,...,464
Table5_risk_Symptoms_For_Neonates	Womens_ID	Num		Womens_ID	1,2,...,663
Table5_risk_Symptoms_For_Neonates	MonthlyID	Num		MonthlyID	1,2,...,42
Table5_risk_Symptoms_For_Neonates	NameSignsAnaemia	Char	50	NameSignsAnaemia	ABCDXY (Z=no data)
Table5_risk_Symptoms_For_Neonates	nsa_1	Num	8	NameSignsAnaemia_A = Pale Nails	0=No; 1=Yes
Table5_risk_Symptoms_For_Neonates	nsa_2	Num	8	NameSignsAnaemia_B = Pale Palms	0=No; 1=Yes
Table5_risk_Symptoms_For_Neonates	nsa_3	Num	8	NameSignsAnaemia_C = Pale Eyelids	0=No; 1=Yes
Table5_risk_Symptoms_For_Neonates	nsa_4	Num	8	NameSignsAnaemia_D = Tiredness	0=No; 1=Yes
Table5_risk_Symptoms_For_Neonates	nsa_5	Num	8	NameSignsAnaemia_X = Other	0=No; 1=Yes
Table5_risk_Symptoms_For_Neonates	nsa_6	Num	8	NameSignsAnaemia_Y = Don´t Know	0=No; 1=Yes
Table5_risk_Symptoms_For_Neonates	NameSignsEmergencyDelivery	Char	50	NameSignsEmergencyDelivery (Multiple answer)	ABCDEFXY (Z=no data)
Table5_risk_Symptoms_For_Neonates	nse_1	Num	8	NameSignsEmergencyDelivery_A = Breech	0=No; 1=Yes
Table5_risk_Symptoms_For_Neonates	nse_2	Num	8	NameSignsEmergencyDelivery_B = Water Broke But It Is A Long Time And Labour Has Not Started	0=No; 1=Yes
Table5_risk_Symptoms_For_Neonates	nse_3	Num	8	NameSignsEmergencyDelivery_C = Heavy Bleeding Before Delivery	0=No; 1=Yes
Table5_risk_Symptoms_For_Neonates	nse_4	Num	8	NameSignsEmergencyDelivery_D = Green Or Brown Waters Coming Out Of Mother	0=No; 1=Yes
Table5_risk_Symptoms_For_Neonates	nse_5	Num	8	NameSignsEmergencyDelivery_E = Mother Has A Fever	0=No; 1=Yes
Table5_risk_Symptoms_For_Neonates	nse_6	Num	8	NameSignsEmergencyDelivery_F = Labour Has Lasted A Long Time Without Much Progress On Delivery	0=No; 1=Yes
Table5_risk_Symptoms_For_Neonates	nse_7	Num	8	NameSignsEmergencyDelivery_X = Other	0=No; 1=Yes
Table5_risk_Symptoms_For_Neonates	nse_8	Num	8	NameSignsEmergencyDelivery_Y = Don´t Know	0=No; 1=Yes
Table5_risk_Symptoms_For_Neonates	ListBreastFeedDiarrhoea	Num	8	ListBreastFeedDiarrhoea	1,,2,3,4,5,8,9
Table5_risk_Symptoms_For_Neonates	ListBreastFeedDiarrhoea	Num	8	ListBreastFeedDiarrhoea = 1	1 = Breastfeed More Frequently And Try To Make The Baby Drink More
Table5_risk_Symptoms_For_Neonates	ListBreastFeedDiarrhoea	Num	8	ListBreastFeedDiarrhoea = 2	2 = Breastfeed When The Child Would Like To But Don´t Make Any Special Efforts
Table5_risk_Symptoms_For_Neonates	ListBreastFeedDiarrhoea	Num	8	ListBreastFeedDiarrhoea = 3	3 = Wait For A Short While Until The Diarrhoea Settles Down And Then Breastfeed Again
Table5_risk_Symptoms_For_Neonates	ListBreastFeedDiarrhoea	Num	8	ListBreastFeedDiarrhoea = 4	4 = Wait For Quite A Long Time Until You Are Sure The Diarrhea Has Stopped And Then Breastfeed Again
Table5_risk_Symptoms_For_Neonates	ListBreastFeedDiarrhoea	Num	8	ListBreastFeedDiarrhoea = 5	5 = Other
Table5_risk_Symptoms_For_Neonates	ListBreastFeedDiarrhoea	Num	8	ListBreastFeedDiarrhoea = 8	8 = Don´t Know
Table5_risk_Symptoms_For_Neonates	ListBreastFeedDiarrhoea	Num	8	ListBreastFeedDiarrhoea = 9	9 = No Data Given
Table5_risk_Symptoms_For_Neonates	ListSignsDehydration	Char	50	ListSignsDehydration	ABCDEFXY (Z=no data)
Table5_risk_Symptoms_For_Neonates	nsde_1	Num	8	ListSignsDehydration_A = Reduced Urinating	0=No; 1=Yes
Table5_risk_Symptoms_For_Neonates	nsde_2	Num	8	ListSignsDehydration_B = Reduced Tears	0=No; 1=Yes
Table5_risk_Symptoms_For_Neonates	nsde_3	Num	8	ListSignsDehydration_C = Dry Mouth And Lips	0=No; 1=Yes
Table5_risk_Symptoms_For_Neonates	nsde_4	Num	8	ListSignsDehydration_D = Sunken Eyes	0=No; 1=Yes
Table5_risk_Symptoms_For_Neonates	nsde_5	Num	8	ListSignsDehydration_E = Sunken Fontanelle (Hole At Top Of Skull)	0=No; 1=Yes
Table5_risk_Symptoms_For_Neonates	nsde_6	Num	8	ListSignsDehydration_F = Pinch Test	0=No; 1=Yes
Table5_risk_Symptoms_For_Neonates	nsde_7	Num	8	ListSignsDehydration_X = Other	0=No; 1=Yes
Table5_risk_Symptoms_For_Neonates	nsde_8	Num	8	ListSignsDehydration_Y = Don´t Know	0=No; 1=Yes
Table5_risk_Symptoms_For_Neonates	ListSignsNeonatalSepsis	Char	50	ListSignsNeonatalSepsis	ABCDEFGHXY (Z=no data)
Table5_risk_Symptoms_For_Neonates	nsns_01	Num	8	ListSignsNeonatalSepsis_A = Reduced Sucking	0=No; 1=Yes
Table5_risk_Symptoms_For_Neonates	nsns_02	Num	8	ListSignsNeonatalSepsis_B = Drowsy Or Unconscious	0=No; 1=Yes
Table5_risk_Symptoms_For_Neonates	nsns_03	Num	8	ListSignsNeonatalSepsis_C = Cold To Touch	0=No; 1=Yes
Table5_risk_Symptoms_For_Neonates	nsns_04	Num	8	ListSignsNeonatalSepsis_D = Fever	0=No; 1=Yes
Table5_risk_Symptoms_For_Neonates	nsns_05	Num	8	ListSignsNeonatalSepsis_E = Breathing Fast	0=No; 1=Yes
Table5_risk_Symptoms_For_Neonates	nsns_06	Num	8	ListSignsNeonatalSepsis_F = Chest Is Indrawing	0=No; 1=Yes
Table5_risk_Symptoms_For_Neonates	nsns_07	Num	8	ListSignsNeonatalSepsis_G = Grunting	0=No; 1=Yes
Table5_risk_Symptoms_For_Neonates	nsns_08	Num	8	ListSignsNeonatalSepsis_H = Skin Infection Or Infection In Umbilical Cord	0=No; 1=Yes
Table5_risk_Symptoms_For_Neonates	nsns_09	Num	8	ListSignsNeonatalSepsis_X = Other	0=No; 1=Yes
Table5_risk_Symptoms_For_Neonates	nsns_10	Num	8	ListSignsNeonatalSepsis_Y = Don´t Know	0=No; 1=Yes
Table6_Antenatal_Delivery_PostnatalCareExperience_Of_Women_Having_Pregnancies	Village_Id	Num	8	Village_Id	1,2,...,464
Table6_Antenatal_Delivery_PostnatalCareExperience_Of_Women_Having_Pregnancies	Womens_ID	Num	8	Womens_ID	1,2,...,663
Table6_Antenatal_Delivery_PostnatalCareExperience_Of_Women_Having_Pregnancies	MonthlyID	Num	8	MonthlyID	1,2,...,42
Table6_Antenatal_Delivery_PostnatalCareExperience_Of_Women_Having_Pregnancies	arm	Num	8	Arm	0='Control' 1='Intervention'
Table6_Antenatal_Delivery_PostnatalCareExperience_Of_Women_Having_Pregnancies	HowManyTimesAntenatalCare	Num	8	HowManyTimesAntenatalCare	1,2,3,4,....
Table6_Antenatal_Delivery_PostnatalCareExperience_Of_Women_Having_Pregnancies	WereYouWeighed	Num	8	WereYouWeighed	0=No; 1=Yes
Table6_Antenatal_Delivery_PostnatalCareExperience_Of_Women_Having_Pregnancies	WasBloodPressureTaken	Num	8	WasBloodPressureTaken	0=No; 1=Yes
Table6_Antenatal_Delivery_PostnatalCareExperience_Of_Women_Having_Pregnancies	DidYouGiveUrineSample	Num	8	DidYouGiveUrineSample	0=No; 1=Yes
Table6_Antenatal_Delivery_PostnatalCareExperience_Of_Women_Having_Pregnancies	DidYouGiveBloodSample	Num	8	DidYouGiveBloodSample	0=No; 1=Yes
Table6_Antenatal_Delivery_PostnatalCareExperience_Of_Women_Having_Pregnancies	WasYourAbdomenChecked	Num	8	WasYourAbdomenChecked	0=No; 1=Yes
Table6_Antenatal_Delivery_PostnatalCareExperience_Of_Women_Having_Pregnancies	WereYouToldDeliveryDate	Num	8	WereYouToldDeliveryDate	0=No; 1=Yes
Table6_Antenatal_Delivery_PostnatalCareExperience_Of_Women_Having_Pregnancies	GivenTetanusInjection	Num	8	GivenTetanusInjection	0=No; 1=Yes
Table6_Antenatal_Delivery_PostnatalCareExperience_Of_Women_Having_Pregnancies	GivenFolicAcid	Num	8	GivenFolicAcid	0=No; 1=Yes
Table6_Antenatal_Delivery_PostnatalCareExperience_Of_Women_Having_Pregnancies	WhoAssistedDelivery	Char	50	WhoAssistedDelivery	ABCDEXY (Z=no data)
Table6_Antenatal_Delivery_PostnatalCareExperience_Of_Women_Having_Pregnancies	whoad_1	Num	8	WhoAssistedDelivery_A = DOCTOR	0=No; 1=Yes
Table6_Antenatal_Delivery_PostnatalCareExperience_Of_Women_Having_Pregnancies	whoad_2	Num	8	WhoAssistedDelivery_B = ANM/NURSE/MIDWIFE/LHV	0=No; 1=Yes
Table6_Antenatal_Delivery_PostnatalCareExperience_Of_Women_Having_Pregnancies	whoad_3	Num	8	WhoAssistedDelivery_C = OTHER HEALTH PERSONNEL	0=No; 1=Yes
Table6_Antenatal_Delivery_PostnatalCareExperience_Of_Women_Having_Pregnancies	whoad_4	Num	8	WhoAssistedDelivery_D = TBA	0=No; 1=Yes
Table6_Antenatal_Delivery_PostnatalCareExperience_Of_Women_Having_Pregnancies	whoad_5	Num	8	WhoAssistedDelivery_E = FRIEND/RELATIVE	0=No; 1=Yes
Table6_Antenatal_Delivery_PostnatalCareExperience_Of_Women_Having_Pregnancies	whoad_6	Num	8	WhoAssistedDelivery_X = OTHER	0=No; 1=Yes
Table6_Antenatal_Delivery_PostnatalCareExperience_Of_Women_Having_Pregnancies	whoad_7	Num	8	WhoAssistedDelivery_Y = NO ONE	0=No; 1=Yes
Table6_Antenatal_Delivery_PostnatalCareExperience_Of_Women_Having_Pregnancies	WhereGiveBirthChild	Num	8	WhereGiveBirthChild	11, 12, 13, 21, 22, 23, 24, 25, 26, 27, 28, 31, 41, 42, 43, 44, 45, 46, 55
Table6_Antenatal_Delivery_PostnatalCareExperience_Of_Women_Having_Pregnancies		Num	8	WhereGiveBirthChild = 11	11-YOUR HOME
Table6_Antenatal_Delivery_PostnatalCareExperience_Of_Women_Having_Pregnancies		Num	8	WhereGiveBirthChild = 12	12-PARENTS’ HOME
Table6_Antenatal_Delivery_PostnatalCareExperience_Of_Women_Having_Pregnancies		Num	8	WhereGiveBirthChild = 13	13-OTHER HOME
Table6_Antenatal_Delivery_PostnatalCareExperience_Of_Women_Having_Pregnancies		Num	8	WhereGiveBirthChild = 21	21-GOVERNMENT/MUNICIPAL HOSPITAL
Table6_Antenatal_Delivery_PostnatalCareExperience_Of_Women_Having_Pregnancies		Num	8	WhereGiveBirthChild = 22	22-GOVERNMENT DISPENSARY
Table6_Antenatal_Delivery_PostnatalCareExperience_Of_Women_Having_Pregnancies		Num	8	WhereGiveBirthChild = 23	23-UHC/UHP/UFWC
Table6_Antenatal_Delivery_PostnatalCareExperience_Of_Women_Having_Pregnancies		Num	8	WhereGiveBirthChild = 24	24-CHC/RURAL HOSPITAL/PHC
Table6_Antenatal_Delivery_PostnatalCareExperience_Of_Women_Having_Pregnancies		Num	8	WhereGiveBirthChild = 25	25-SUB-CENTRE
Table6_Antenatal_Delivery_PostnatalCareExperience_Of_Women_Having_Pregnancies		Num	8	WhereGiveBirthChild = 26	26-ANGANWADI/ICDS CENTRE
Table6_Antenatal_Delivery_PostnatalCareExperience_Of_Women_Having_Pregnancies		Num	8	WhereGiveBirthChild = 27	27-VILLAGE CLINIC BY ANM
Table6_Antenatal_Delivery_PostnatalCareExperience_Of_Women_Having_Pregnancies		Num	8	WhereGiveBirthChild = 28	28-OTHER PUBLIC SECTOR HEALTH FACILITY
Table6_Antenatal_Delivery_PostnatalCareExperience_Of_Women_Having_Pregnancies		Num	8	WhereGiveBirthChild = 31	31-NGO/TRUST HOSPITAL/CLINIC
Table6_Antenatal_Delivery_PostnatalCareExperience_Of_Women_Having_Pregnancies		Num	8	WhereGiveBirthChild = 41	41-PRIVATE HOSPITAL/MATERNITY HOME/CLINIC
Table6_Antenatal_Delivery_PostnatalCareExperience_Of_Women_Having_Pregnancies		Num	8	WhereGiveBirthChild = 42	42-OTHER PRIVATE HEALTH SECTOR FACILITY
Table6_Antenatal_Delivery_PostnatalCareExperience_Of_Women_Having_Pregnancies		Num	8	WhereGiveBirthChild = 43	43-4DESIGNATED NPHC 1
Table6_Antenatal_Delivery_PostnatalCareExperience_Of_Women_Having_Pregnancies		Num	8	WhereGiveBirthChild = 44	44-DESIGNATED NPHC 2
Table6_Antenatal_Delivery_PostnatalCareExperience_Of_Women_Having_Pregnancies		Num	8	WhereGiveBirthChild = 45	45-DESIGNATED NPHC 3
Table6_Antenatal_Delivery_PostnatalCareExperience_Of_Women_Having_Pregnancies		Num	8	WhereGiveBirthChild = 46	46-DESIGNATED NPHC 4
Table6_Antenatal_Delivery_PostnatalCareExperience_Of_Women_Having_Pregnancies		Num	8	WhereGiveBirthChild = 55	55-OTHER
Table6_Antenatal_Delivery_PostnatalCareExperience_Of_Women_Having_Pregnancies	ArriveBeforeDuringAfterDelivery	Num	8	ArriveBeforeDuringAfterDelivery	1-BEFORE, 2-DURING, 3-AFTER
Table6_Antenatal_Delivery_PostnatalCareExperience_Of_Women_Having_Pregnancies	TransportationToFacility	Char	50	TransportationToFacility	ABCDX (Z=no data)
Table6_Antenatal_Delivery_PostnatalCareExperience_Of_Women_Having_Pregnancies	transp_1	Num	8	TransportationToFacility_A	A-Naandi emergency free ambulance
Table6_Antenatal_Delivery_PostnatalCareExperience_Of_Women_Having_Pregnancies	transp_2	Num	8	TransportationToFacility_B	B-Paid private transportation
Table6_Antenatal_Delivery_PostnatalCareExperience_Of_Women_Having_Pregnancies	transp_3	Num	8	TransportationToFacility_C	C-Emergency government transport
Table6_Antenatal_Delivery_PostnatalCareExperience_Of_Women_Having_Pregnancies	transp_4	Num	8	TransportationToFacility_D	D-Walked
Table6_Antenatal_Delivery_PostnatalCareExperience_Of_Women_Having_Pregnancies	transp_5	Num	8	TransportationToFacility_X	X-Other
Table6_Antenatal_Delivery_PostnatalCareExperience_Of_Women_Having_Pregnancies	HowChildDelivered	Num	8	HowChildDelivered	1-VAGINAL CEPHALIC, 2-VAGINAL BREECH, 3-CAESARIAN SECTION, 8-DON’T KNOW
Table6_Antenatal_Delivery_PostnatalCareExperience_Of_Women_Having_Pregnancies	CutUmbilicalCord	Num	8	CutUmbilicalCord	1-GLASS, 2-KNIFE, 3-SCISSORS, 4-RAZOR, 5-SICKLE, 6-STONE, 8-DON’T KNOW, 55-OTHER
Table6_Antenatal_Delivery_PostnatalCareExperience_Of_Women_Having_Pregnancies	InstrumentTreatment	Char	50	InstrumentTreatment	ABCDXY (Z=no data)
Table6_Antenatal_Delivery_PostnatalCareExperience_Of_Women_Having_Pregnancies	instrt_1	Num	8	InstrumentTreatment_A	A-PLACED IN BOILING WATER
Table6_Antenatal_Delivery_PostnatalCareExperience_Of_Women_Having_Pregnancies	instrt_2	Num	8	InstrumentTreatment_B	B-WIPED WITH ALCOHOL SOLUTION
Table6_Antenatal_Delivery_PostnatalCareExperience_Of_Women_Having_Pregnancies	instrt_3	Num	8	InstrumentTreatment_C	C-PLACED OVER OPEN FLAME
Table6_Antenatal_Delivery_PostnatalCareExperience_Of_Women_Having_Pregnancies	instrt_4	Num	8	InstrumentTreatment_D	D-WIPED CLEAN
Table6_Antenatal_Delivery_PostnatalCareExperience_Of_Women_Having_Pregnancies	instrt_5	Num	8	InstrumentTreatment_X	X-OTHER
Table6_Antenatal_Delivery_PostnatalCareExperience_Of_Women_Having_Pregnancies	instrt_6	Num	8	InstrumentTreatment_Y	Y-DON’T KNOW
Table6_Antenatal_Delivery_PostnatalCareExperience_Of_Women_Having_Pregnancies	DressUmbilicalCord	Num	8	DressUmbilicalCord	1-COW DUNG, 2-TURMERIC, 3-TOBACCO, 4-DIRT, 5-ANTISEPTIC, 6-SALIVA, 7-ASH, 8-DON’T KNOW, 9-NOTHING, 55-OTHER
Table6_Antenatal_Delivery_PostnatalCareExperience_Of_Women_Having_Pregnancies	WasDisposableKitUsed	Num	8	WasDisposableKitUsed	0=No; 1=Yes; 8-DON’T KNOW; 9-NOTHING
Table6_Antenatal_Delivery_PostnatalCareExperience_Of_Women_Having_Pregnancies	WasBabyWipedAndWrapped	Num	8	WasBabyWipedAndWrapped	0=No; 1=Yes; 8-DON’T KNOW; 9-NOTHING
Table6_Antenatal_Delivery_PostnatalCareExperience_Of_Women_Having_Pregnancies	WasChildWeighed	Num	8	WasChildWeighed	0=No; 1=Yes; 8-DON’T KNOW; 9-NOTHING
Table6_Antenatal_Delivery_PostnatalCareExperience_Of_Women_Having_Pregnancies	DidYouEverBreastFeedChild	Num	8	DidYouEverBreastFeedChild	0=No; 1=Yes; 8-DON’T KNOW; 9-NOTHING
Table6_Antenatal_Delivery_PostnatalCareExperience_Of_Women_Having_Pregnancies	HowLongAfterBirthPutBreastPeriod	Num	8	HowLongAfterBirthPutBreastPeriod	0-Immediately or within half an hour; 1=Hours; 2-Days; 98-Don't Know; 99-Nothing
Table7_SatisfiedWithCare	Village_Id	Num		Village_Id	1,2,...,464
Table7_SatisfiedWithCare	Womens_ID	Num		Womens_ID	1,2,...,663
Table7_SatisfiedWithCare	MonthlyID	Num		MonthlyID	1,2,...,42
Table7_SatisfiedWithCare	arm	Num	8	Arm	0='Control' 1='Intervention'
Table7_SatisfiedWithCare	RateCarePregnant	Num	8	RateCarePregnant	1-Very Bad, 2-Bad, 3-Good, 4-Very Good, 9-No Data Given
Table7_SatisfiedWithCare	SatisfiedCarePregnant	Char	50	SatisfiedCarePregnant	ABCDEFGHXYZ
Table7_SatisfiedWithCare	scp_01	Num	8	SatisfiedCarePregnant_A	A-Cost Too Much
Table7_SatisfiedWithCare	scp_02	Num	8	SatisfiedCarePregnant_B	B-Facility Not Open
Table7_SatisfiedWithCare	scp_03	Num	8	SatisfiedCarePregnant_C	C-Too Far/ Transportation
Table7_SatisfiedWithCare	scp_04	Num	8	SatisfiedCarePregnant_D	D-Don’t Trust Facility/Poor Quality Service
Table7_SatisfiedWithCare	scp_05	Num	8	SatisfiedCarePregnant_E	E-No Female Provider At Facility
Table7_SatisfiedWithCare	scp_06	Num	8	SatisfiedCarePregnant_F	F-Husband/Family Did Not Allow
Table7_SatisfiedWithCare	scp_07	Num	8	SatisfiedCarePregnant_G	G-Not Necessary
Table7_SatisfiedWithCare	scp_08	Num	8	SatisfiedCarePregnant_H	H-Not Customary
Table7_SatisfiedWithCare	scp_09	Num	8	SatisfiedCarePregnant_X	X-Other
Table7_SatisfiedWithCare	scp_10	Num	8	SatisfiedCarePregnant_Y	Y-Fully Satisified
Table7_SatisfiedWithCare	scp_11	Num	8	SatisfiedCarePregnant_Z	Z-No Data
Table7_SatisfiedWithCare	RateCareDelivery	Num	8	RateCareDelivery	1-Very Bad, 2-Bad, 3-Good, 4-Very Good, 9-No Data Given
Table7_SatisfiedWithCare	SatisfiedCareDelivery	Char	50	SatisfiedCareDelivery	ABCDEFGHXYZ
Table7_SatisfiedWithCare	scd_01	Num	8	SatisfiedCareDelivery_A	A-Cost Too Much
Table7_SatisfiedWithCare	scd_02	Num	8	SatisfiedCareDelivery_B	B-Facility Not Open
Table7_SatisfiedWithCare	scd_03	Num	8	SatisfiedCareDelivery_C	C-Too Far/ Transportation
Table7_SatisfiedWithCare	scd_04	Num	8	SatisfiedCareDelivery_D	D-Don’t Trust Facility/Poor Quality Service
Table7_SatisfiedWithCare	scd_05	Num	8	SatisfiedCareDelivery_E	E-No Female Provider At Facility
Table7_SatisfiedWithCare	scd_06	Num	8	SatisfiedCareDelivery_F	F-Husband/Family Did Not Allow
Table7_SatisfiedWithCare	scd_07	Num	8	SatisfiedCareDelivery_G	G-Not Necessary
Table7_SatisfiedWithCare	scd_08	Num	8	SatisfiedCareDelivery_H	H-Not Customary
Table7_SatisfiedWithCare	scd_09	Num	8	SatisfiedCareDelivery_X	X-Other
Table7_SatisfiedWithCare	scd_10	Num	8	SatisfiedCareDelivery_Y	Y-Fully Satisified
Table7_SatisfiedWithCare	scd_11	Num	8	SatisfiedCareDelivery_Z	Z-No Data
Table7_SatisfiedWithCare	RateCareDelivery28Days	Num	8	RateCareDelivery28Days	1-Very Bad, 2-Bad, 3-Good, 4-Very Good, 9-No Data Given
Table7_SatisfiedWithCare	SatisfiedCareDelivery28Days	Char	50	SatisfiedCareDelivery28Days	ABCDEFGHXYZ
Table7_SatisfiedWithCare	scd28_01	Num	8	SatisfiedCareDelivery28days_A	A-Cost Too Much
Table7_SatisfiedWithCare	scd28_02	Num	8	SatisfiedCareDelivery28days_B	B-Facility Not Open
Table7_SatisfiedWithCare	scd28_03	Num	8	SatisfiedCareDelivery28days_C	C-Too Far/ Transportation
Table7_SatisfiedWithCare	scd28_04	Num	8	SatisfiedCareDelivery28days_D	D-Don’t Trust Facility/Poor Quality Service
Table7_SatisfiedWithCare	scd28_05	Num	8	SatisfiedCareDelivery28days_E	E-No Female Provider At Facility
Table7_SatisfiedWithCare	scd28_06	Num	8	SatisfiedCareDelivery28days_F	F-Husband/Family Did Not Allow
Table7_SatisfiedWithCare	scd28_07	Num	8	SatisfiedCareDelivery28days_G	G-Not Necessary
Table7_SatisfiedWithCare	scd28_08	Num	8	SatisfiedCareDelivery28days_H	H-Not Customary
Table7_SatisfiedWithCare	scd28_09	Num	8	SatisfiedCareDelivery28days_X	X-Other
Table7_SatisfiedWithCare	scd28_10	Num	8	SatisfiedCareDelivery28days_Y	Y-Fully Satisified
Table7_SatisfiedWithCare	scd28_11	Num	8	SatisfiedCareDelivery28days_Z	Z-No Data
