# Supplementary material for: Community health promotion and medical provision for neonatal health—CHAMPION cluster randomised trial in Nagarkurnool district, Telangana (formerly Andhra Pradesh), India
Source: PLoS Med. 2017 Jul 5;14(7):e1002324. doi: 10.1371/journal.pmed.1002324 (PMC5497957; doi:10.1371/journal.pmed.1002324)
Supplement: S5 Data — (CSV) [file pmed.1002324.s005.csv]

Village_Id	arm	traveltime	VillageType
1	0	2	1
2	0	2	3
3	0	1	1
4	1	2	1
5	0	1	3
6	1	2	3
7	0	1	1
8	0	1	1
9	1	1	1
10	1	1	3
11	0	1	1
12	1	1	3
13	1	1	3
14	1	1	1
15	1	2	3
16	0	1	1
17	0	1	3
18	0	2	3
19	1	1	3
20	1	2	3
21	0	2	3
22	0	1	3
23	0	1	3
24	0	2	1
25	1	2	3
26	0	1	1
27	1	1	1
28	1	1	3
29	1	1	1
30	1	2	3
31	1	1	3
32	1	2	3
33	1	1	3
34	0	1	3
35	0	1	1
36	0	2	1
37	1	1	1
38	0	1	3
39	1	2	1
40	0	2	3
41	1	1	3
42	0	2	3
43	0	1	1
44	1	2	3
45	0	1	1
46	0	2	3
47	0	1	3
48	0	1	3
49	0	2	1
50	0	1	1
51	0	1	3
52	0	1	1
53	0	1	3
54	0	1	3
55	1	1	2
56	0	1	1
57	1	1	1
58	0	2	1
59	1	1	1
60	0	2	1
61	1	1	1
62	1	1	3
63	1	1	1
64	1	1	1
65	1	1	1
66	0	2	2
67	1	1	1
68	1	1	1
69	1	1	3
70	1	1	1
71	0	1	2
72	1	2	1
73	0	2	1
74	1	1	1
75	1	1	2
76	1	1	1
77	0	1	3
78	1	2	2
79	1	2	1
80	1	2	2
81	1	1	1
82	0	1	1
83	0	1	1
84	0	1	3
85	1	2	1
86	0	1	1
87	1	1	1
88	1	1	1
89	1	1	1
90	1	1	1
91	1	1	1
92	0	1	3
93	0	1	1
94	1	1	1
95	1	1	1
96	1	1	1
97	0	1	3
98	1	1	1
99	0	1	1
100	0	1	1
101	0	1	1
102	0	1	1
103	1	1	1
104	0	1	1
105	0	1	1
106	0	1	1
107	1	1	1
108	1	1	1
109	1	1	1
110	1	1	1
111	0	1	3
112	1	1	1
113	0	1	1
114	1	1	1
115	0	1	1
116	0	1	1
117	1	1	1
118	1	1	1
119	1	1	3
120	1	1	3
121	0	1	3
122	0	1	3
123	0	1	1
124	1	1	3
125	0	1	3
126	1	1	3
127	0	1	3
128	0	1	3
129	1	1	3
130	1	1	3
131	1	1	3
132	1	1	1
133	1	1	3
134	0	1	3
135	1	1	3
136	1	1	3
137	1	1	3
138	0	1	3
139	1	1	3
140	1	1	3
141	1	1	3
142	1	1	1
143	1	1	1
144	0	1	1
145	0	1	1
146	1	1	1
147	0	1	1
148	1	1	3
149	0	1	3
150	1	1	3
151	1	1	3
152	0	1	3
153	0	1	3
154	0	1	1
155	0	1	3
156	1	1	3
157	1	1	3
158	0	1	3
159	0	1	1
160	0	1	3
161	1	1	1
162	0	1	3
163	0	1	3
164	1	1	3
165	0	1	1
166	0	1	3
167	0	1	1
168	0	1	3
169	1	1	1
170	0	1	1
171	0	1	3
172	0	1	3
173	0	2	3
174	0	2	3
175	0	1	3
176	1	1	1
177	0	1	1
178	0	1	1
179	0	1	3
180	1	1	1
181	0	1	1
182	0	1	1
183	1	2	3
184	1	1	3
185	0	1	1
186	0	1	1
187	1	1	3
188	1	1	3
189	0	1	3
190	1	1	1
191	1	2	1
192	1	2	3
193	0	1	3
194	1	2	1
195	0	2	1
196	1	2	3
197	0	1	1
198	1	1	3
199	0	1	1
200	0	1	1
201	0	1	1
202	0	2	2
203	0	1	3
204	1	2	2
205	1	1	1
206	1	1	1
207	1	1	1
208	0	1	3
209	0	2	2
210	1	2	2
211	1	2	2
212	1	2	3
213	1	2	2
214	1	2	2
215	1	1	1
216	0	2	2
217	1	1	3
218	1	2	2
219	1	1	1
220	0	1	1
221	1	1	1
222	0	1	1
223	0	1	1
224	1	2	2
225	0	2	2
226	0	1	1
227	1	1	2
228	0	2	2
229	1	1	1
230	1	1	1
231	0	1	2
232	1	1	1
233	0	2	2
234	1	1	1
235	0	2	3
236	1	2	2
237	0	1	1
238	1	1	3
239	0	1	1
240	1	2	3
241	0	1	1
242	1	1	1
243	0	1	3
244	0	1	2
245	0	1	1
246	1	2	2
247	0	2	2
248	1	2	1
249	0	2	2
250	0	1	1
251	1	2	2
252	1	2	2
253	0	2	2
254	1	2	1
255	0	2	1
256	0	2	3
257	0	1	1
258	0	2	2
259	1	2	1
260	0	2	2
261	0	2	2
262	0	2	1
263	1	2	3
264	1	2	2
265	0	2	3
266	1	1	1
267	0	2	1
268	0	2	3
269	0	1	1
270	0	1	1
271	0	1	1
272	0	2	2
273	0	2	2
274	0	2	2
275	0	2	1
276	0	2	2
277	0	2	2
278	0	1	1
279	1	2	2
280	1	2	1
281	1	2	2
282	0	1	1
283	1	2	1
284	0	1	1
285	1	2	2
286	1	2	1
287	1	2	1
288	1	1	1
289	0	1	1
290	0	1	1
291	0	1	1
292	0	1	1
293	1	1	1
294	1	1	1
295	1	1	1
296	1	1	1
297	1	1	1
298	1	1	1
299	1	1	1
300	1	1	1
301	1	1	3
302	0	1	1
303	0	1	1
304	0	1	1
305	1	1	1
306	1	1	3
307	1	1	1
308	1	1	1
309	0	2	1
310	0	1	1
311	0	1	1
312	1	2	1
313	1	1	1
314	1	1	3
315	0	2	1
316	0	1	1
317	1	2	1
318	1	1	1
319	0	1	1
320	0	1	1
321	0	1	1
322	0	1	1
323	1	2	1
324	1	1	1
325	0	2	3
326	1	1	1
327	0	1	1
328	0	1	1
329	1	1	3
330	0	1	1
331	1	1	1
332	0	1	1
333	0	1	1
334	0	1	3
335	1	1	1
336	0	1	1
337	1	1	1
338	0	1	1
339	0	1	1
340	1	1	1
341	0	1	1
342	1	1	3
343	1	1	1
344	0	1	3
345	1	1	3
346	1	1	1
347	0	1	1
348	0	1	1
349	1	1	1
350	1	1	3
351	1	1	1
352	1	1	3
353	1	1	3
354	1	1	1
355	0	1	1
356	1	1	1
357	0	1	1
358	1	1	1
359	0	1	3
360	0	1	1
361	1	1	1
362	1	1	1
363	0	1	1
364	1	1	1
365	1	1	1
366	1	1	1
367	0	1	1
368	0	1	1
369	0	1	1
370	1	1	1
371	1	1	1
372	1	1	1
373	1	1	1
374	0	1	1
375	1	1	1
376	1	1	1
377	0	1	1
378	1	1	1
379	1	1	1
380	0	1	1
381	0	1	1
382	0	2	3
383	1	1	1
384	0	2	1
385	1	2	3
386	1	1	1
387	0	2	1
388	1	1	3
389	0	1	1
390	1	1	1
391	0	2	3
392	1	1	3
393	1	1	1
394	0	2	1
395	1	1	3
396	1	2	1
397	0	2	1
398	1	1	3
399	0	1	1
400	1	2	3
401	1	1	3
402	0	2	3
403	0	1	1
404	1	1	3
405	0	1	1
406	1	1	1
407	0	1	3
408	1	2	3
409	0	2	3
410	1	2	3
411	1	1	1
412	1	1	3
413	1	1	1
414	1	2	3
415	1	1	3
416	0	1	3
417	1	1	1
418	0	1	1
419	1	2	3
420	0	1	1
421	1	1	1
422	0	1	1
423	0	2	3
424	0	2	3
425	1	2	1
426	0	2	1
427	0	1	3
428	0	1	3
429	1	2	3
430	0	1	1
431	0	1	1
432	1	1	3
433	1	1	1
434	1	1	3
435	0	1	1
436	0	1	3
437	0	1	1
438	0	1	1
439	0	1	3
440	1	1	1
441	0	1	3
442	0	1	1
443	1	1	3
444	1	1	1
445	0	1	1
446	1	1	1
447	1	1	1
448	0	1	1
449	1	1	1
450	1	1	1
451	0	1	3
452	1	1	1
453	1	1	1
454	0	1	1
455	1	1	3
456	0	1	3
457	0	1	1
458	1	1	1
459	0	1	1
460	1	1	1
461	0	1	3
462	0	1	1
463	0	1	1
464	0	1	3
