# Supplementary material for: Community health promotion and medical provision for neonatal health—CHAMPION cluster randomised trial in Nagarkurnool district, Telangana (formerly Andhra Pradesh), India
Source: PLoS Med. 2017 Jul 5;14(7):e1002324. doi: 10.1371/journal.pmed.1002324 (PMC5497957; doi:10.1371/journal.pmed.1002324)
Supplement: S6 Data — (CSV) [file pmed.1002324.s006.csv]

Village_Id	Womens_ID	arm	SchoolYearsWoman	SchoolYearsHusband	PreviousMiscarriage	Age	BirthsInTheLastYear	NeonatalDeathsInLastYear	nbirths	ind6months
1	11	0	10	9	0	20	0	0	1	1
1	17	0	3	9	1	25	0	0	1	1
1	20	0	0	5	1	25	0	0	2	1
1	46	0	0	0	0	25	1	0	1	1
1	51	0	0	0	0	22	0	0	2	1
1	71	0	0	2	0	23	0	0	1	1
1	86	0	2	4	0	22	1	0	1	1
1	97	0	0	0	0	30	0	0	1	1
1	99	0	0	2	0	30	0	0	1	1
1	114	0	0	0	1	25	1	0	1	1
1	130	0	0	8	1	25	1	0	1	1
1	131	0	0	0	0	20	1	0	1	1
1	136	0	0	6	0	28	1	0	1	1
1	138	0	0	2	0	25	1	0	2	1
1	139	0	0	0	1	20	0	0	1	1
1	189	0	2	0	0	18			2	1
1	190	0				16			1	1
1	191	0	0	0	0	18			2	1
1	192	0	4	6	0	18			1	1
1	193	0	0	3	0	17			2	1
1	194	0	0	3	1	18			2	1
1	197	0	0	2	1	18			2	1
1	199	0	0	3	0	18			1	1
1	202	0	2	0	0	18			1	1
1	203	0	3		0	20			1	1
1	206	0				17			1	1
1	207	0	3	11	0	20			1	1
1	208	0	14	12	1	18			1	1
1	213	0	0	9	0	19			1	1
1	214	0	4	10	0	18			1	1
2	12	0	0	5	1	19	0	0	3	1
2	19	0	0	5	1	20	0	0	3	1
2	37	0	1	0	0	25	1	0	2	1
2	45	0	0	6	1	14			1	1
2	46	0	1	7	0	15			1	1
2	53	0	0	10	0	18			1	1
2	54	0	2	0	0	17			1	1
3	9	0	0	0	1	17	0	0	3	1
3	10	0	5	0	0	27	0	0	1	1
3	30	0	7	6	1	22	1	0	2	1
3	48	0	0	11	0	18	0	0	2	1
3	102	0	0	10	0	22	0	0	1	1
3	106	0	10	0	0	19	0	0	1	1
3	111	0	0	0	1	22	0	0	2	1
3	132	0	0	0	0	17	0	0	1	1
3	136	0	0	0	0	20	1	0	1	1
3	162	0	0	0	0	19	1	0	1	1
3	163	0	0	11	1	22	1	0	1	1
3	165	0	5	11	0	20			3	1
3	166	0	0	5	0	18			1	1
3	167	0	0	0	0	18			1	1
3	169	0	5	7	0	18			1	1
3	170	0	0	0	1	18			1	1
3	178	0	10	0	0	20			1	1
3	179	0	0	0	1	19			2	1
3	181	0	0	15	0	18			1	1
3	183	0	0	5	0	18			1	1
3	184	0	0	18	0	18			2	1
3	186	0	0	0	1	20			2	1
3	193	0	0	2	0	20			1	1
3	202	0	6	0	0	18			1	1
3	205	0	0	0	0	19			1	1
4	4	1	0	0	0	20	0	0	2	1
4	6	1	0	0	0	22	0	0	1	1
4	18	1	5	0	0	23	0	0	2	1
4	28	1	0	0	0	22	0	0	1	1
4	32	1	1	1	0	22	0	0	2	1
4	37	1	10	11	0	32	0	0	1	1
4	38	1	0	3	0	25	0	0	1	1
4	44	1	0	0	1	22	0	0	2	1
4	55	1	0	0	0	21	0	0	1	1
4	57	1	0	10	0	20	0	0	2	1
4	60	1	0	3	0	25	0	0	2	1
4	68	1	2	0	0	22	0	0	1	1
4	70	1	2	0	1	25	0	0	1	1
4	74	1	0	0	1	25	0	0	2	1
4	81	1				25	0	0	1	1
4	84	1	0	0	0	20	0	0	1	1
4	85	1	0	7	1	27	0	0	2	1
4	86	1	0	0	0	30	0	0	1	1
4	101	1	0	11	0	15			1	1
4	102	1	0	0	1	16			3	1
4	105	1	3	0	0	18			2	1
4	109	1	0	11	0	18			1	1
4	110	1	0	0	0	18			2	1
4	111	1	0	0	0	20			1	1
4	114	1	2	0	0	18			1	1
4	117	1	0	0	0	18			1	1
4	121	1	5	2	0	20			1	1
5	4	0	0	7	1	22	0	0	2	1
5	10	0	0	0	0	21	0	0	2	1
5	12	0	0	0	1	21	0	0	2	1
5	31	0				24	0	0	1	1
5	32	0	5	11	0	27	0	0	1	1
5	33	0	2	5	1	18			3	1
5	37	0	0	0	0	18			1	1
6	25	1	1	7	0	18			2	1
6	29	1	0	11	0	20			1	1
6	30	1	12	12	0	18			1	1
6	35	1				18			1	1
7	9	0	0	0	1	24	0	0	1	1
7	12	0	0	0	0	25	1	0	2	1
7	17	0	0	5	0	19	1	0	1	1
7	26	0	0	9	0	20	1	0	1	1
7	27	0	0	7	1	20	0	0	2	1
7	53	0	0	12	0	20	1	0	1	1
7	75	0	0	0	0	18	1	0	1	1
7	76	0	0	0	0	18	0	0	1	1
7	84	0	4	5	0	18	0	0	2	1
7	100	0	0	10	0	23	1	0	1	1
7	118	0	0	0	0	25	0	0	1	1
7	161	0	0	6	0	25	1	0	1	1
7	173	0	0	3	1	30	0	0	1	1
7	186	0	0	9	1	18			3	1
7	187	0	0	0	0	17			2	1
7	189	0	10	15	0	18			1	1
7	190	0	0	7	0	19			2	1
7	192	0	0	10	0	18			1	1
7	197	0	8	6	0	19			1	1
7	198	0	0	3	0	19			1	1
7	199	0	0	4	0	18			1	1
8	42	0	15	18	0	22	0	0	1	1
8	89	0	0	0	0	22	1	0	1	1
8	198	0	0	6	0	28	0	0	1	1
8	312	0	0	9	0	22	0	0	1	1
8	314	0	0	12	0	22	1	0	1	1
8	316	0	0	0	0	22	1	0	2	1
8	332	0				25	1	0	1	1
8	343	0	6	0	0	20	0	0	2	1
8	346	0	8	8	0	21	0	0	1	1
8	356	0	0	0	0	23	0	0	2	1
8	361	0				25	1	0	1	1
8	367	0	5	7	0	22	1	0	1	1
8	375	0	0	10	0	22	0	0	2	1
8	376	0	10	12	0	22	0	0	2	1
8	383	0	0	0	0	22	0	0	2	1
8	384	0	0	6	0	20	0	0	2	1
8	398	0	3	5	0	22	1	0	2	1
8	404	0	4	2	0	25	0	0	1	1
8	406	0	0	0	0	22	1	0	1	1
8	407	0	0	4	0	21	1	0	1	1
8	413	0	0	2	0	30	0	0	1	1
8	420	0	2	0	0	30	0	0	1	1
8	423	0	0	2	0	25	0	0	2	1
8	427	0				25	1	0	1	1
8	437	0	1	0	1	24	0	0	2	1
8	439	0	0	5	0	20	0	0	2	1
8	443	0				23	1	0	1	1
8	455	0	0	0	0	21	1	0	1	1
8	463	0	0	10	1	28	0	0	1	1
8	481	0	2	0	0	23	0	0	1	1
8	486	0	0	8	0	20	1	0	1	1
8	490	0	0	0	1	30	0	0	2	1
8	495	0	6	0	1	21	1	0	1	1
8	501	0	0	0	0	24	0	0	2	1
8	509	0	12	17	0	25	0	0	2	1
8	513	0	0	3	0	19	0	0	1	1
8	515	0	0	7	0	18	0	0	1	1
8	517	0	10	10	0	20	0	0	1	1
8	521	0	4	0	0	18			1	1
8	522	0	0	0	0	18			1	1
8	524	0				18			1	1
8	527	0	0	0	0	18			1	1
8	528	0	15	17	0	18			1	1
8	529	0	0	2	0	18			1	1
8	530	0	6	10	0	18			1	1
8	531	0	0	0	1	18			1	1
8	532	0	0	2	0	18			1	1
8	533	0	4	5	1	18			2	1
8	537	0	10	10	0	18			2	1
8	541	0	4	9	0	18			1	1
8	543	0	0	5	0	18			1	1
8	544	0	0	6	0	18			1	1
8	545	0	10	5	0	18			1	1
8	566	0	10	10	0	20			1	1
9	9	1	4	12	0	22	1	0	1	1
9	11	1	0	0	0	22	0	0	2	1
9	26	1	0	0	1	19	0	0	2	1
9	28	1	0	0	0	21	0	0	1	1
9	35	1	5	10	0	20	0	0	2	1
9	38	1	0	0	1	22	0	0	2	1
9	61	1	5	0	0	20	0	0	1	1
9	70	1	8	8	0	17	0	0	2	1
9	76	1	0	5	1	25	1	0	1	1
9	101	1	0	0	0	24	0	0	2	1
9	121	1				26	0	0	1	1
9	122	1	0	0	0	20	0	0	1	1
9	126	1	15	10	0	20	1	0	1	1
9	131	1	12	15	1	22	0	0	3	1
9	133	1	0	0	0	18			1	1
9	137	1	0	0	1	18			2	1
9	138	1	0	0	0	20			1	1
9	141	1	12	12	0	21			1	1
9	149	1	5	0	0	19			1	1
9	150	1	12	13	0	18			1	1
9	153	1	0	0	0	18			1	1
9	158	1	5	0	0	20			1	1
9	165	1	0	4	0	19			1	1
9	167	1	0	7	0	20			1	1
9	169	1	7		1	18			1	1
9	181	1				19			1	1
10	12	1	0	0	0	25	0	0	3	1
10	13	1	0	0	0	20	0	0	2	1
10	14	1	3	3	1	20	0	0	2	1
10	34	1	0	0	0	21	0	0	1	1
10	35	1	0	0	0	20	0	0	1	1
10	37	1	0	0	0	18	0	0	2	1
10	38	1	0	10	1	25	0	0	1	1
10	40	1	0	0	1	26	0	0	2	1
10	43	1	0	5	0	23	0	0	3	1
10	47	1	0	0	0	23	0	0	2	1
10	49	1	0	0	1	25	0	0	2	1
10	55	1	0	0	0	25	1	0	2	1
10	57	1	0	0	0	23	0	0	2	1
10	59	1	0	0	0	20	0	0	1	1
10	73	1	0	0	1	23	0	0	3	1
10	75	1	2	0	1	26	1	0	1	1
10	78	1	0	0	0	23	1	0	2	1
10	79	1				26	0	0	1	1
10	80	1	0	0	0	20	0	0	1	1
10	83	1	0	0	0	22	1	0	1	1
10	87	1	0	0	0	30	0	0	1	1
10	90	1	0	0	1	32	0	0	2	1
10	94	1	0	0	1	26	1	0	1	1
10	101	1	0	0	0	18			1	1
10	103	1	10	13	0	18			2	1
10	105	1	3	4	0	18			1	1
10	106	1	0	0	0	25			1	1
10	109	1	0	0	0	18			1	1
10	110	1	0	0	0	19			1	1
10	111	1	0	0	0	18			1	1
10	113	1	6	7	0	19			1	1
11	3	0	11	7	0	18	0	0	2	1
11	10	0	5	10	0	24	0	0	1	1
11	29	0	0	0	0	25	0	0	2	1
11	32	0	10	10	0	22	0	0	1	1
11	39	0	7	5	0	19	0	0	2	1
11	41	0	11	0	0	18	1	0	1	1
11	45	0	0	0	1	25	1	1	1	1
11	48	0	7	12	1	25	0	0	1	1
11	60	0	9	11	0	22	0	0	2	1
11	61	0	0	0	0	20	1	0	1	1
11	63	0	0	5	1	27	0	0	1	1
11	83	0	10	0	0	18	0	0	1	1
11	85	0	0	0	0	18	0	0	1	1
11	101	0	4	12	0	20	0	0	1	1
11	106	0	0	10	0	20	0	0	1	1
11	111	0	12	10	1	19	0	0	1	1
11	121	0	9	9	0	17			2	1
11	122	0	0	9	0	18			1	1
11	125	0	12		0	20			2	1
11	126	0	12	5	0	20			1	1
11	127	0	12	11	0	21			1	1
11	128	0	0	10	0	20			2	1
11	129	0	0	0	0	20			1	1
11	134	0	0	0	0	20			1	1
11	147	0	0	0	0	19			1	1
11	158	0	10	10	0	20			1	1
12	19	1	5	10	0	20	0	0	1	1
12	20	1	0	10	0	19	0	0	2	1
12	25	1	0	5	0	25	0	0	1	1
12	28	1	7	16	0	22	0	0	2	1
12	33	1	0	0	0	25	1	0	1	1
12	36	1	0	0	0	23	0	0	2	1
12	47	1	0	0	0	22	0	0	1	1
12	79	1	0	0	0	21	0	0	2	1
12	90	1	11	15	0	22	0	0	1	1
12	101	1				18			1	1
12	102	1	0	7	1	19			2	1
12	103	1				18			1	1
12	105	1	0	0	0	25			1	1
12	110	1	0	6	0	20			1	1
12	113	1	0	0	1	19			1	1
12	115	1	0	8	0	18			1	1
12	116	1	0	0	0	18			1	1
12	118	1	0	6	0	20			1	1
12	121	1	0	0	0	19			2	1
13	8	1	0	6	0	25	1	0	2	1
13	11	1	0	16	1	20	1	0	1	1
13	14	1	0	10	1	19	1	0	2	1
13	19	1	0	0	1	25	1	0	1	1
13	25	1	0	0	0	20	1	0	1	1
13	38	1	0	0	1	22	1	0	1	1
13	41	1	0	0	0	22	1	0	1	1
13	42	1	0	0	0	23	1	0	2	1
13	48	1	1	0	0	19	0	0	1	1
13	49	1	0	0	0	35	1	0	1	1
13	52	1	2	3	0	20	0	0	2	1
13	53	1	0	0	0	25	0	0	1	1
13	59	1	0	0	0	25	0	0	1	1
13	97	1	4	0	0	18			1	1
13	101	1				19			1	1
13	103	1	0	0	1	20			1	1
13	104	1	0	0	0	19			1	1
14	20	1	10	7	0	19	0	0	2	1
14	29	1	0	12	1	28	0	0	1	1
14	32	1	0	8	0	28	1	0	1	1
14	34	1	0	0	1	21	1	0	2	1
14	52	1	10	5	0	20	0	0	1	1
14	69	1	4	5	0	26	0	0	2	1
14	72	1	0	0	0	25	0	0	1	1
14	78	1	5	10	0	24	1	0	1	1
14	89	1	0	7	1	30	0	0	2	1
14	98	1	12	12	0	20	0	0	1	1
14	99	1	12	13	0	24	0	0	1	1
14	108	1	0	0	0	29	0	0	1	1
14	109	1	7	3	0	19	0	0	1	1
14	111	1	0	2	0	24	1	0	1	1
14	122	1	7	10	0	27	0	0	2	1
14	137	1				19			1	1
14	141	1	5	0	0	20			1	1
14	146	1	1	5	0	20			1	1
14	147	1	0	10	1	18			1	1
14	150	1	4	7	0	18			1	1
14	153	1	0	0	0	18			1	1
14	157	1	10	10	0	20			1	1
15	4	1	0	0	0	23	1	0	2	1
15	6	1	2	0	0	20	0	0	1	1
15	10	1	0	10	1	30	0	0	1	1
15	12	1	0	0	1	25	0	0	2	1
15	23	1	7	0	1	30	0	0	2	1
15	29	1	0	10	0	25	0	0	2	1
15	31	1	0	0	0	25	0	0	1	1
15	32	1				26	0	0	1	1
15	45	1	2	0	0	18			1	1
15	46	1	2	11	0	17			1	1
15	49	1	3	0	0	20			1	1
16	3	0	0	10	0	25	0	0	1	1
16	5	0	10	0	0	21	0	0	2	1
16	7	0	0	0	0	27	1	0	1	1
16	14	0	0		0	18	0	0	2	1
16	22	0	0	0	1	19	1	0	1	1
16	23	0	0	3	0	26	1	0	1	1
16	30	0	0	7	1	18	0	0	1	1
16	37	0	0	0	1	20	0	0	1	1
16	55	0	10	0	0	22	0	0	1	1
16	68	0	0	4	0	20	1	0	1	1
16	84	0	0	3	0	21	1	0	2	1
16	103	0	0	10	0	20	0	0	1	1
16	106	0	0	0	0	21	0	0	1	1
16	113	0	0	0	0	19			1	1
16	114	0				20			1	1
16	115	0	0	5	0	20			1	1
16	117	0	0	7	0	18			1	1
16	118	0	12	12	0	19			1	1
16	121	0	0	3	0	20			1	1
16	126	0	10	10	0	18			1	1
17	7	0	0	5	1	18	0	0	2	1
17	11	0	0	6	0	30	0	0	3	1
17	16	0	0	7	1	25	1	0	2	1
17	17	0	0	6	1	20	1	0	2	1
17	20	0	0	0	0	25	0	0	2	1
17	28	0	0	0	1	23	0	0	1	1
17	31	0	0	0	1	25	0	0	2	1
17	34	0	0	0	1	25	0	0	1	1
17	35	0	0	0	1	20	0	0	1	1
17	37	0	0	0	0	25	0	0	2	1
17	43	0	6	0	0	22	0	0	2	1
17	50	0	0	5	1	18	0	0	2	1
17	53	0	0	0	0	18			1	1
17	57	0	0	5	1	18			1	1
17	61	0	9	10	0	18			2	1
17	63	0	0	10	0	18			1	1
17	73	0	5	5	0	18			1	1
18	4	0	0		0	28	0	0	1	1
18	5	0	0	0	1	25	0	0	3	1
18	7	0	0	2	1	26	0	0	2	1
18	12	0	0	0	0	22	1	0	2	1
18	19	0	0	6	0	26	1	0	3	1
18	22	0				22	1	0	1	1
18	46	0	0	0	0	26	0	0	1	1
18	47	0	0	10	0	24	0	0	3	1
18	49	0	0	0	0	24	0	0	1	1
18	59	0	0	3	0	18			1	1
18	60	0	0	0	0	19			1	1
18	61	0	0	7	0	18			1	1
18	65	0	0	3	0	17			1	1
19	3	1	0	0	1	20	1	0	1	1
19	5	1	0	0	0	22	0	0	1	1
19	8	1	0	2	1	20	0	0	1	1
19	9	1	11	11	1	22	0	0	2	1
19	18	1	0	9	0	25	0	0	2	1
19	21	1	0	10	0	25	0	0	2	1
19	28	1	6	0	1	22	0	0	1	1
19	41	1	0	0	1	18			2	1
19	42	1	5	0	0	18			2	1
19	45	1	17	15	0	23			2	1
19	49	1	12	12	0	23			1	1
19	53	1	12	12	0	20			1	1
19	54	1				20			1	1
20	4	1	5	11	0	22	0	0	1	1
20	8	1	0	0	0	23	0	0	2	1
20	17	1	0	5	0	15			1	1
21	1	0	0	0	0	18	1	0	2	1
21	8	0	0	0	0	29	0	0	1	1
21	9	0	0	0	1	30	0	0	2	1
21	15	0	0	0	1	20	0	0	1	1
21	36	0	1	7	1	19	0	0	1	1
21	43	0	0	0	0	26	1	0	1	1
21	47	0	0	0	0	18	0	0	1	1
21	51	0	0	0	1	21	0	0	2	1
21	52	0	0	5	0	28	0	0	1	1
21	54	0	0	10	0	28	0	0	1	1
21	63	0	0	9	0	20	1	0	2	1
21	65	0				17	0	0	1	1
21	71	0	0	10	1	25	0	0	1	1
21	82	0	0	3	0	18	1	0	1	1
21	83	0	5	0	0	19	0	0	2	1
21	94	0	0	6	0	26	1	0	1	1
21	99	0	1	6	1	20	0	0	1	1
21	105	0	2	0	0	19	1	0	1	1
21	113	0	0	16	0	17			1	1
21	114	0	13	11	0	17			1	1
21	117	0	0	0	0	19			1	1
21	121	0	0	0	0	18			1	1
22	3	0	0	0	0	22	0	0	2	1
22	7	0	3	4	0	20	0	0	2	1
22	11	0	3	4	1	22	0	0	1	1
22	13	0	0	2	0	25	0	0	2	1
22	17	0	0	0	0	22	1	0	1	1
22	27	0	0	0	0	25	1	0	1	1
22	35	0	0	0	0	27	0	0	1	1
22	49	0	0		0	20			1	1
22	50	0	7	8	0	16			1	1
23	3	0	0	0	1	24	1	0	3	1
23	15	0	0	5	0	20	0	0	1	1
23	22	0	0	12	0	25	1	0	1	1
23	27	0	0	6	0	20	1	0	2	1
23	29	0	0		1	21	1	0	2	1
23	38	0	0	7	0	35	0	0	1	1
23	52	0	0	0	1	30	0	0	2	1
23	57	0	0	0	0	21	1	0	1	1
23	70	0				25	1	0	1	1
23	83	0	3		1	19	0	0	1	1
23	91	0	0	0	0	20			1	1
23	93	0	0	15	0	20			1	1
23	94	0	0	12	0	20			1	1
23	98	0	0	0	0	20			1	1
23	105	0	0	10	0	18			1	1
23	107	0	11	12	0	21			1	1
24	4	0	0	0	0	25	0	0	1	1
24	18	0	2	0	1	21	0	0	1	1
24	29	0	0	5	1	25	0	0	1	1
24	42	0	0	0	0	24	1	0	1	1
24	51	0	0	5	0	22	1	0	1	1
24	53	0	6	10	0	22	1	0	1	1
24	62	0	0	10	1	25	1	0	1	1
24	63	0	0	0	0	25	0	0	2	1
24	64	0	0	0	0	23	0	0	1	1
24	66	0	0	4	0	20	0	0	2	1
24	68	0	0	5	0	22	1	0	1	1
24	78	0	2	7	0	20	1	0	1	1
24	88	0	0	10	0	25	1	0	1	1
24	123	0	0	0	0	21	1	0	1	1
24	130	0	5	1	0	22	1	0	1	1
24	133	0	3	0	0	22	1	0	1	1
24	140	0	5	6	1	25	1	0	1	1
24	157	0	0	10	0	19	0	0	2	1
24	160	0	0	0	0	22	0	0	1	1
24	161	0	0	3	0	20	0	0	2	1
24	172	0	5	3	0	20	1	0	2	1
24	174	0	6	0	0	19			1	1
24	175	0	12	12	0	19			1	1
24	176	0	9	3	0	19			1	1
24	182	0	7	0	0	19			1	1
24	185	0	2	5	0	19			1	1
24	193	0	5	3	0	19			1	1
25	6	1	0	1	1	22	1	0	1	1
25	7	1	0	5	0	20	0	0	1	1
25	26	1	5	0	0	20	1	0	2	1
25	37	1	0	0	0	30	0	0	1	1
25	39	1	0	10	1	18	1	0	2	1
25	41	1	0	14	1	22	1	0	2	1
25	70	1	0		1	30	0	0	1	1
25	75	1				20			1	1
25	81	1	0	0	0	18			1	1
25	86	1	5	10	0	18			1	1
26	1	0	0	10	1	22	1	0	1	1
26	26	0	0	7	1	28	1	0	2	1
26	30	0	10	0	1	21	0	0	1	1
26	32	0	0	0	1	25	1	0	2	1
26	48	0	11	10	0	20	0	0	1	1
26	57	0	11	10	0	21	1	0	1	1
26	60	0	0	4	0	25	1	0	1	1
26	72	0	0	9	1	25	0	0	2	1
26	99	0	0	0	0	28	0	0	2	1
26	103	0	10	15	1	20	1	0	2	1
26	117	0	0	5	0	18	0	0	2	1
26	118	0	7	7	1	18	0	0	3	1
26	120	0	5	13	0	18	0	0	1	1
26	521	0	12	10	0	18			1	1
26	522	0	5	15	0	19			2	1
26	523	0	5	5	0	18			1	1
26	524	0	5	0	1	18			2	1
26	527	0	3	5	1	18			1	1
26	528	0	6	12	1	19			2	1
26	529	0	12	7	0	19			1	1
26	533	0				18			1	1
26	537	0	10	12	0	18			1	1
26	541	0	3	9	0	18			1	1
26	542	0	0	8	0	19			1	1
26	545	0				19			1	1
27	25	1	0	0	0	22	0	0	2	1
27	33	1	5	0	0	20	0	0	2	1
27	38	1	7	0	0	25	0	0	2	1
27	54	1				20	0	0	1	1
27	123	1	0	0	0	25	0	0	1	1
27	137	1	10	12	0	20	0	0	1	1
27	140	1	0	0	0	25	1	0	1	1
27	150	1	0	0	1	22	0	0	1	1
27	153	1	0	12	0	22	0	0	1	1
27	182	1	10	10	0	20	1	0	1	1
27	186	1	0	0	0	20	0	0	1	1
27	198	1	0	0	1	25	0	0	1	1
27	200	1	0	7	0	20	0	0	1	1
27	204	1	0	0	0	20	1	0	1	1
27	205	1	0	5	1	18	0	0	2	1
27	208	1	8	0	0	25	0	0	1	1
27	213	1	10	10	0	20			1	1
27	221	1	10	9	1	18			1	1
27	225	1	0	5	0	21			1	1
27	229	1	5	1	0	19			1	1
27	230	1	9	12	0	18			1	1
27	231	1	0	5	0	18			1	1
27	233	1	8	9	0	20			1	1
27	238	1	0	0	0	20			1	1
27	241	1	5	0	0	23			1	1
27	242	1	0	0	0	21			1	1
27	243	1	10	12	1	21			1	1
27	246	1	8	7	0	20			1	1
27	247	1	0	0	1	21			1	1
28	8	1	0	0	1	24	0	0	1	1
28	16	1	0	0	0	28	1	0	1	1
28	22	1	0	15	0	24	1	0	2	1
28	23	1	0	0	1	38	1	0	2	1
28	25	1	0	0	0	23	1	0	1	1
28	26	1	0	0	0	24	0	0	2	1
28	27	1	0	0	0	35	0	0	2	1
28	34	1	0	0	1	25	0	0	3	1
28	38	1	0	0	0	23	0	0	1	1
28	46	1	0	0	0	19	0	0	2	1
28	51	1	0	0	0	38	0	0	1	1
28	54	1	0	5	1	22	1	0	2	1
28	57	1	10	0	1	20	0	0	2	1
28	61	1	0	0	0	18			2	1
28	62	1	0	0	0	16			2	1
28	64	1	0	10	0	16			1	1
28	65	1	0	0	0	17			1	1
28	73	1	0	0	1	18			1	1
28	75	1	6	2	0	17			1	1
28	77	1	0	0	0	19			1	1
28	81	1	0	0	0	19			1	1
28	85	1	0	10	0	18			1	1
28	89	1				18			1	1
28	91	1	0	0	0	18			1	1
29	1	1	10	7	0	21	0	0	1	1
29	9	1	9	11	0	21	0	0	1	1
29	21	1	0	0	0	20	0	0	2	1
29	22	1	1	11	0	20	0	0	2	1
29	24	1	0	5	1	25	0	0	1	1
29	25	1	0	3	0	20	0	0	2	1
29	32	1				20	0	0	1	1
29	34	1	2	14	0	20	0	0	1	1
29	35	1	3	0	0	21	0	0	1	1
29	37	1	0	7	0	24	0	0	1	1
29	42	1	15	16	0	20	0	0	2	1
29	44	1	14	10	0	23	0	0	1	1
29	45	1	4	7	0	26	0	0	2	1
29	58	1	0	7	0	20	0	0	1	1
29	93	1	2	1	0	28	0	0	1	1
29	100	1	0	0	0	22	0	0	1	1
29	109	1	10	8	0	20	0	0	1	1
29	123	1	0	7	1	29	1	0	1	1
29	140	1	9	11	0	30	0	0	1	1
29	141	1	0	10	0	29	1	0	1	1
29	145	1	0	11	1	30	1	0	2	1
29	151	1	5	11	0	28	0	0	1	1
29	156	1	10	15	0	28	1	0	2	1
29	160	1	0	11	0	31	0	0	2	1
29	162	1	12	15	0	32	1	0	2	1
29	175	1	0	0	1	25	0	0	1	1
29	203	1	0	6	1	25	0	0	1	1
29	206	1	0	2	0	22	1	0	1	1
29	210	1	12	14	0	18			2	1
29	213	1	0	0	0	18			1	1
29	214	1	5	9	0	18			1	1
29	217	1	0	4	0	20			1	1
29	218	1	1	11	0	18			1	1
29	221	1	0	6	0	18			1	1
29	225	1	10	11	0	19			1	1
29	229	1	3	6	0	19			1	1
29	233	1	4	11	0	19			1	1
29	242	1	0	0	0	18			1	1
29	245	1	9	2	0	18			1	1
29	246	1	10	10	0	18			1	1
29	247	1	5	7	0	18			1	1
29	248	1	12	11	0	17			1	1
29	249	1	10	11	0	19			1	1
29	250	1	12	16	0	16			1	1
29	254	1	0	7	0	18			1	1
30	5	1	11	9	1	22	0	0	1	1
30	11	1	1	0	1	21	0	0	2	1
30	14	1	0	5	1	20	0	0	2	1
30	18	1	0	0	1	22	1	0	1	1
30	29	1	0	0	0	23	1	0	1	1
30	30	1	0	10	1	23	1	0	2	1
30	32	1	16	16	0	20	0	0	1	1
30	33	1	2	15	1	19	0	0	2	1
30	45	1				26	0	0	1	1
30	47	1	0	3	0	26	0	0	1	1
30	51	1	0	12	1	25	1	0	3	1
30	57	1	15	12	0	21	0	0	1	1
30	63	1	0	0	0	28	1	0	1	1
30	65	1	0	7	1	19	1	0	2	1
30	70	1	0	2	0	18	0	0	1	1
30	92	1	0	5	0	21	1	0	2	1
30	100	1	0	0	0	24	1	0	2	1
30	101	1	0	0	1	20	1	0	1	1
30	114	1	0	12	0	18			1	1
30	117	1	2	7	0	16			1	1
30	121	1	0	6	0	21			1	1
30	123	1	11	7	0	19			1	1
30	125	1	0	0	0	19			1	1
30	129	1				18			1	1
31	6	1	5	15	0	19	0	0	2	1
31	10	1	0	5	1	23	0	0	1	1
31	14	1	5	0	0	15	1	0	2	1
31	19	1	2	0	1	20	0	0	2	1
31	37	1	0	0	0	25	0	0	1	1
31	42	1	0	0	0	20	0	0	2	1
31	44	1	0	0	0	22	1	0	1	1
31	46	1	0	0	0	20	0	0	1	1
31	49	1	0	3	1	25	0	0	2	1
31	50	1	1	0	1	23	1	0	2	1
31	51	1	0	6	0	30	0	0	1	1
31	56	1	0	0	1	25	0	0	2	1
31	61	1	0	0	0	20	0	0	1	1
31	73	1	0	6	1	18			1	1
31	74	1	2	0	0	18			1	1
31	77	1	0	5	1	18			2	1
31	81	1	0	0	1	18			1	1
31	85	1	0	6	0	18			1	1
31	89	1	3	5	0	18			1	1
31	90	1	0	2	0	18			1	1
31	91	1	0	0	0	18			1	1
31	92	1				18			1	1
32	15	1	1	0	0	26	1	0	1	1
32	16	1	0	7	0	26	1	0	1	1
32	18	1	0	2	0	30	0	0	1	1
32	19	1	0	5	0	20	0	0	1	1
32	31	1	0	5	1	20	1	0	1	1
32	33	1	0	0	1	25	0	0	2	1
32	54	1	0	10	0	22			1	1
32	69	1	3		0	18			1	1
32	70	1	3	0	0	18			1	1
33	9	1	0	6	1	19	0	0	2	1
33	13	1	0	5	1	24	0	0	2	1
33	21	1	5	6	0	20	0	0	2	1
33	27	1	0	0	0	18	0	0	1	1
33	31	1	0	10	1	25	0	0	2	1
33	33	1	0	0	0	27	1	0	2	1
33	34	1	0	3	0	24	1	0	1	1
33	37	1	1	7	1	25	1	0	1	1
33	39	1	0	5	0	28	0	0	1	1
33	42	1	0	12	0	27	1	0	2	1
33	44	1	0	2	0	22	0	0	2	1
33	47	1	0	0	1	20	0	0	2	1
33	57	1	0	10	0	20			2	1
33	61	1	4	5	0	19			1	1
33	62	1	0	0	0	19			1	1
34	6	0	0	0	1	23	0	0	1	1
34	9	0	0	0	0	30	0	0	1	1
34	10	0	0	2	0	18	0	0	1	1
34	12	0	7	8	0	22	0	0	1	1
34	32	0	0	10	1	20	0	0	2	1
34	36	0	0	3	1	25	0	0	1	1
34	42	0	0	5	0	20	0	0	2	1
34	43	0	0	0	0	22	1	0	1	1
34	49	0	0	0	0	19	0	0	2	1
34	54	0	0	0	0	20	1	0	1	1
34	58	0	0	5	1	19	0	0	2	1
34	64	0	0	5	0	39	1	0	1	1
34	66	0				28	0	0	1	1
34	68	0	0	5	0	19	1	0	2	1
34	71	0	10	10	0	19	1	0	1	1
34	75	0	0	0	0	19	0	0	1	1
34	77	0	0	5	0	19	1	0	1	1
34	78	0	0	12	1	23	0	0	3	1
34	79	0	0	0	0	22	0	0	2	1
34	83	0	0	0	0	21	1	0	1	1
34	87	0	0	7	1	23	0	0	2	1
34	88	0	0		1	20	0	0	2	1
34	92	0	0	0	1	32	1	0	1	1
34	105	0	0	0	0	18			1	1
34	106	0	0	0	0	17			1	1
34	107	0	0	0	0	16			1	1
34	109	0	0	0	0	20			1	1
34	113	0	0	0	0	20			1	1
34	117	0	0	0	0	19			1	1
34	118	0	9	12	0	18			1	1
34	119	0	3	9	0	18			1	1
34	122	0	0	0	0	19			1	1
34	125	0				20			1	1
35	1	0	0	0	0	20	1	0	1	1
35	4	0	0	0	0	20	0	0	1	1
35	8	0	0	0	1	25	0	0	1	1
35	10	0	0	0	0	21	0	0	1	1
35	43	0	0	10	0	19	0	0	1	1
35	44	0	3	15	0	25	0	0	2	1
35	51	0	0	0	0	28	1	0	1	1
35	73	0	0		0	28	1	0	2	1
35	74	0	0	0	0	19	0	0	2	1
35	76	0	9	15	0	20	1	0	2	1
35	82	0	0	0	0	20	1	0	1	1
35	110	0	0	0	0	22	0	0	2	1
35	121	0	10	12	1	26	1	0	1	1
35	125	0	0	0	1	23	0	0	1	1
35	153	0	3	0	1	21	0	0	2	1
35	168	0	5	0	0	20	0	0	1	1
35	201	0	6	0	0	20	0	0	2	1
35	202	0	7	7	1	23	1	0	2	1
35	205	0	0	9	0	20	0	0	1	1
35	226	0	7	11	1	20	0	0	1	1
35	233	0	0	6	1	23	0	0	1	1
35	237	0	0	12	0	18			2	1
35	239	0	5	7	0	18			1	1
35	240	0	4	10	0	19			1	1
35	241	0	0	0	0	18			1	1
35	242	0	0	5	1	19			2	1
35	243	0	12	10	1	18			1	1
35	245	0	0	0	0	20			1	1
35	247	0	0	0	1	20			2	1
35	248	0	0	7	1	18			1	1
35	249	0	0	7	1	16			2	1
35	253	0	0	0	0	20			1	1
35	254	0	0	0	0	21			1	1
35	256	0	0	11	0	20			1	1
35	258	0	10	7	0	20			1	1
35	259	0	9	0	0	20			1	1
35	261	0	6	10	0	19			1	1
35	264	0	15	13	0	19			1	1
35	267	0	10	10	0	20			1	1
35	271	0	0	0	0	18			1	1
36	21	0	5	0	0	19			1	1
36	22	0	7	0	0	20			1	1
37	6	1	0	0	1	25	0	0	1	1
37	14	1	0	0	0	25	0	0	1	1
37	19	1	5	9	0	21	1	0	1	1
37	22	1	5	10	0	16	0	0	2	1
37	47	1	0	0	0	18	0	0	1	1
37	58	1	0	11	0	31	1	0	1	1
37	70	1	0	7	0	35	0	0	1	1
37	81	1				20	0	0	1	1
37	86	1	10	15	0	20	0	0	2	1
37	89	1	12	12	0	22	0	0	3	1
37	109	1	0	0	0	20	1	0	1	1
37	122	1	0	12	0	23	1	0	1	1
37	144	1	4	10	1	29	1	0	1	1
37	146	1	0	5	0	24	1	0	2	1
37	147	1	0	10	1	29	0	0	1	1
37	151	1	0	0	0	20	0	0	1	1
37	168	1	0		1	20	0	0	2	1
37	170	1	0	10	0	22	1	0	1	1
37	171	1	3	0	0	20	1	0	1	1
37	185	1	6	7	1	22	0	0	2	1
37	213	1	0	7	0	20	0	0	1	1
37	220	1	0	8	0	20	0	0	2	1
37	236	1	4	3	0	19	0	0	2	1
37	240	1	2	0	1	19	1	0	2	1
37	241	1	0	6	1	25	1	0	2	1
37	243	1	0	7	0	21	1	0	2	1
37	248	1	0	0	0	22	1	0	1	1
37	249	1	0	5	0	25	1	0	1	1
37	253	1	10	10	0	20	0	0	2	1
37	254	1	5	10	0	20	0	0	1	1
37	255	1	3	10	0	18	0	0	1	1
37	257	1	12	13	0	19			1	1
37	258	1	5	5	0	18			2	1
37	261	1	2	10	0	19			1	1
37	263	1	10	8	0	18			1	1
37	264	1	11	12	0	19			2	1
37	266	1				21			1	1
37	269	1	0	5	1	22			1	1
37	275	1	0	0	1	21			2	1
37	277	1	14	12	0	20			1	1
37	282	1	0	0	0	19			1	1
37	289	1	5	10	0	18			1	1
37	290	1	11	12	0	19			1	1
37	293	1	0	10	0	19			1	1
37	297	1	0	9	0	22			1	1
37	301	1	0	0	0	22			1	1
37	314	1	5	9	0	20			1	1
37	317	1	0	6	0	20			1	1
38	17	0	3	4	0	20	0	0	1	1
38	31	0	4	0	1	25	0	0	3	1
38	34	0	2	4	1	25	1	0	2	1
38	45	0	5	12	0	18			2	1
38	46	0	3	7	1	18			1	1
38	49	0	13	11	0	18			1	1
38	53	0	12	15	0	21			1	1
39	2	1	0	0	1	19	1	0	3	1
39	6	1	10	15	0	23	0	0	2	1
39	7	1	15	15	0	22	0	0	2	1
39	17	1	2	0	0	18	0	0	2	1
39	23	1	4	0	0	21	0	0	1	1
39	28	1	0	7	1	21	0	0	1	1
39	32	1	0	0	0	18	0	0	2	1
39	37	1	0	0	0	18	0	0	2	1
39	38	1	0	0	0	20	0	0	1	1
39	39	1	0	0	1	19	0	0	2	1
39	42	1	0	7	0	23	1	0	1	1
39	43	1	2	7	0	20	0	0	2	1
39	56	1	14	12	0	23	0	0	1	1
39	65	1	5	0	0	20	0	0	1	1
39	72	1	1	0	0	25	0	0	2	1
39	91	1	0	0	0	20	1	0	2	1
39	98	1	0	0	0	20	0	0	2	1
39	106	1	0	0	0	20	1	0	2	1
39	115	1	0	0	0	18	0	0	2	1
39	135	1	3	6	0	25	0	0	1	1
39	147	1	2	0	0	18	0	0	1	1
39	153	1	0	0	0	20	0	0	2	1
39	156	1	0	0	1	20	0	0	2	1
39	159	1	6	6	0	20	1	0	1	1
39	174	1	0		0	25	1	0	2	1
39	175	1	2	2	0	19	0	0	2	1
39	176	1	0	0	0	20	1	0	1	1
39	186	1	0	0	0	20	1	0	1	1
39	197	1	5	9	0	18			2	1
39	199	1	3	10	0	18			1	1
39	200	1	2	4	0	18			1	1
39	203	1	7	0	0	18			1	1
39	205	1	10	5	0	17			2	1
39	207	1	0	0	1	18			1	1
39	208	1	17	17	0	22			1	1
39	209	1	12	15	0	21			2	1
39	210	1	5	9	0	20			1	1
39	213	1	0	0	0	18			1	1
39	214	1	1	0	0	18			1	1
39	216	1	10	10	0	20			2	1
39	217	1	12	10	0	19			1	1
39	221	1	0	0	0	18			1	1
39	225	1	0	5	0	18			1	1
39	229	1	2		0	18			1	1
39	235	1	10	9	0	19			1	1
39	238	1	7	8	0	18			1	1
40	8	0	0	0	1	22	1	0	1	1
40	12	0	5	0	0	29	0	0	2	1
40	14	0	0	5	0	24	1	0	1	1
40	15	0	0	6	0	26	0	0	2	1
40	21	0	0	0	1	22	0	0	2	1
40	23	0	0	0	1	20	0	0	3	1
40	44	0	0	7	0	20	0	0	2	1
40	53	0	4	5	1	22	0	0	1	1
40	60	0	0	0	0	28	0	0	2	1
40	77	0	0	2	0	22	0	0	2	1
40	78	0	0	10	0	23	0	0	2	1
40	87	0	0	0	0	20	0	0	2	1
40	88	0	0	0	0	23	0	0	2	1
40	89	0	0	0	0	18			1	1
40	90	0	0	5	0	18			2	1
40	91	0	0	6	0	18			1	1
40	94	0	0	5	0	18			1	1
40	97	0	0	5	0	18			1	1
40	106	0	3	10	0	18			1	1
41	2	1	0	0	1	24	0	0	1	1
41	11	1	0	0	0	20	1	0	1	1
41	13	1	0	0	0	18	1	0	1	1
41	15	1	0	0	0	26	0	0	1	1
41	33	1	0	0	1	19	0	0	1	1
41	36	1	2	8	0	20	0	0	2	1
41	40	1	7	0	0	20	0	0	1	1
41	41	1	0	5	1	20	0	0	2	1
41	44	1	16	15	0	25	0	0	1	1
41	49	1	0	10	0	20	1	0	1	1
41	53	1	8	0	0	19			1	1
41	61	1	0	10	0	18			1	1
41	62	1	7	0	1	16			2	1
41	65	1	6	10	0	19			1	1
41	72	1	9	0	0	20			1	1
41	77	1				20			1	1
42	41	0	0	5	1	21			1	1
42	42	0	0	5	0	20			1	1
42	45	0	0	0	0	19			1	1
43	8	0	0		0	20	0	0	2	1
43	9	0	0	0	0	28	0	0	1	1
43	14	0	6	10	0	18	1	0	1	1
43	15	0	0	0	0	25	1	0	1	1
43	16	0				25	0	0	1	1
43	33	0				17	0	0	1	1
43	34	0	2	0	0	28	0	0	1	1
43	35	0	0	6	0	18	0	0	2	1
43	38	0	10	10	1	22	0	0	1	1
43	45	0	8	0	0	18	0	0	1	1
43	46	0	5	0	0	25	1	0	1	1
43	61	0	10	15	0	25	1	0	1	1
43	63	0	4	0	0	28	1	0	1	1
43	68	0	0	0	0	34	0	0	1	1
43	69	0	4	0	0	28	1	0	1	1
43	73	0	5	10	1	22	0	0	1	1
43	88	0	0	5	0	25	1	0	1	1
43	89	0	5	6	0	22	0	0	3	1
43	92	0	0	5	0	30	0	0	1	1
43	94	0	0	0	1	25	0	0	1	1
43	102	0	0	10	0	22	1	0	2	1
43	108	0	0	0	0	28	0	0	1	1
43	109	0	0	0	0	22	1	0	1	1
43	112	0	0	9	0	22	1	0	2	1
43	113	0	0	10	1	24	1	0	2	1
43	123	0	0	5	0	28	1	0	1	1
43	139	0	12	7	0	23	0	0	2	1
43	145	0	5	10	0	25	1	0	1	1
43	151	0	10	10	1	23	0	0	2	1
43	155	0	0	0	0	19	0	0	1	1
43	164	0	0	0	0	21	2	1	1	1
43	166	0	0	0	0	30	0	0	1	1
43	170	0	0	0	1	25	1	0	1	1
43	175	0	0	9	1	18			2	1
43	177	0	0	0	0	17			2	1
43	178	0	5	7	0	19			1	1
43	182	0	0	0	0	18			1	1
43	184	0	10	10	0	21			1	1
43	185	0	0	12	0	22			1	1
43	201	0	15	15	0	22			1	1
43	206	0	5	10	0	20			1	1
43	208	0	0	0	0	22			1	1
44	4	1	0	12	0	25	1	0	1	1
44	21	1	11	9	1	19			1	1
45	8	0	6	0	0	27	1	0	2	1
45	20	0				23	1	0	1	1
45	31	0	6	0	0	23	0	0	1	1
45	36	0	2	0	0	30	1	0	1	1
45	43	0	0	0	0	23	0	0	1	1
45	50	0	0	3	1	25	0	0	1	1
45	60	0	0	0	0	26	0	0	1	1
45	61	0	5	5	0	22	0	0	2	1
45	64	0	0	0	0	22	1	0	1	1
45	67	0	0	0	0	25	1	0	1	1
45	70	0	0	0	0	27	0	0	1	1
45	73	0	0	0	1	28	1	0	1	1
45	75	0	0	0	0	20	0	0	2	1
45	89	0	0	0	0	25	0	0	1	1
45	94	0	0	0	0	27	1	0	1	1
45	136	0	0	8	1	27	1	0	2	1
45	139	0	4	0	1	26	0	0	1	1
45	143	0	0	0	0	28	1	0	1	1
45	150	0	0	12	0	25	1	0	1	1
45	154	0	4	0	1	26	0	0	2	1
45	158	0	9	0	0	27	1	0	1	1
45	162	0	0	0	1	29	1	0	1	1
45	164	0	4	0	0	28	1	0	1	1
45	188	0	0	6	0	29	1	0	2	1
45	193	0	0	0	1	29	1	0	1	1
45	229	0	3	0	0	28	1	0	1	1
45	252	0	10	7	0	28	1	0	1	1
45	273	0	0	5	0	28	1	0	1	1
45	307	0	0	10	0	18			1	1
45	308	0	0	0	0	18			2	1
45	309	0	13	10	0	20	0	0	1	1
45	310	0	12	12	0	20	0	0	1	1
45	311	0	7	2	0	19	0	0	1	1
45	313	0	12	13	0	18	0	0	1	1
45	314	0	2	3	0	18			1	1
45	315	0	0	12	0	19			2	1
45	316	0	0	0	0	19			1	1
45	318	0	3	10	0	18			1	1
45	321	0				19			1	1
45	325	0	0	0	0	18			1	1
45	329	0	3	2	0	19			1	1
45	330	0	0	0	0	18			1	1
45	336	0	12	15	0	18			1	1
45	340	0	0	5	0	19			1	1
45	346	0	4	0	0	19			1	1
45	349	0	0	0	0	19			1	1
45	350	0	0	7	0	16			1	1
45	351	0	0	7	0	18			1	1
45	361	0	10	12	0	19			1	1
45	365	0	13	15	0	18			1	1
45	368	0	12	12	0	18			1	1
46	7	0	0	0	0	20	0	0	1	1
46	11	0	0	0	1	25	1	0	2	1
46	17	0	0	0	0	18			1	1
47	9	0	4	12	1	22	0	0	1	1
47	10	0				28	0	0	1	1
47	33	0	0	0	0	18			1	1
47	37	0	12	10	0	20			1	1
47	38	0	12	5	0	20			1	1
47	39	0	15	14	0	22			1	1
47	41	0	12	10	0	20			1	1
47	45	0	10	12	0	20			1	1
48	2	0	10	16	0	20	0	0	2	1
48	6	0	0	0	1	25	0	0	2	1
48	12	0	0	6	0	40	0	0	1	1
48	15	0	0	5	1	22	0	0	3	1
48	30	0	1	5	1	20	1	0	1	1
48	48	0	0	5	1	25	1	0	2	1
48	52	0	0	6	0	23	0	0	1	1
48	54	0	5	3	0	25	1	0	2	1
48	65	0	8	16	0	23	0	0	2	1
48	71	0				24	1	0	1	1
48	78	0	0	0	1	25	0	0	2	1
48	82	0	5	0	1	25	1	0	1	1
48	89	0	0	7	0	21			1	1
48	93	0	0	10	0	19			2	1
48	98	0	14	17	0	19			1	1
48	99	0	12	14	0	19			1	1
48	101	0	10	17	0	19			1	1
48	105	0	11	15	0	18			1	1
49	15	0	6	10	0	20	1	0	2	1
49	17	0	6		0	25	0	0	2	1
49	19	0	0	0	0	20	0	0	1	1
49	27	0	0	0	0	22	1	0	1	1
49	34	0	7	12	0	20	0	0	2	1
49	80	0				21	0	0	1	1
49	100	0	0	0	0	25	0	0	2	1
49	117	0	12	17	0	20	0	0	1	1
49	135	0	0	10	1	21	0	0	1	1
49	140	0	0		0	25	0	0	2	1
49	181	0	0	7	0	20	0	0	2	1
49	183	0	10	10	0	21	0	0	2	1
49	184	0	0	0	0	28	0	0	2	1
49	241	0				25	0	0	1	1
49	251	0	4	10	0	30	1	0	1	1
49	257	0	5	10	0	22	0	0	2	1
49	259	0	0	5	0	19			1	1
49	260	0	4	0	0	18	0	0	1	1
49	261	0	11	10	0	18	0	0	1	1
49	262	0	3	15	0	19	0	0	2	1
49	265	0	0	7	1	18			1	1
49	269	0	9	10	1	18			1	1
49	273	0	3	9	0	20			1	1
49	274	0	0	0	0	21			1	1
49	277	0	11	7	0	20			1	1
49	281	0	3	10	0	19			1	1
49	285	0	0	5	0	18			1	1
49	287	0	3	3	0	19			1	1
49	288	0	10	12	0	20			1	1
50	3	0	7	12	0	20	0	0	1	1
50	22	0	7	10	0	40	0	0	2	1
50	33	0	0	9	0	17	0	0	2	1
50	53	0	10	0	0	20	0	0	1	1
50	70	0	0	5	0	21	1	0	1	1
50	75	0	10	12	0	19	0	0	1	1
50	94	0	3	0	0	23	0	0	1	1
50	97	0	0	10	0	20	0	0	1	1
50	98	0	0	9	0	17	0	0	1	1
50	99	0	0	0	1	25	0	0	1	1
50	101	0	0	10	0	23	0	0	1	1
50	103	0	10	15	0	18	0	0	1	1
50	108	0	0	10	0	15	0	0	2	1
50	110	0	10	7	0	15	0	0	2	1
50	111	0	13	10	0	22	0	0	1	1
50	137	0	0	3	1	40	0	0	1	1
50	148	0	0	10	0	21	0	0	2	1
50	154	0	0	0	0	19	0	0	2	1
50	157	0	12	15	0	20	0	0	1	1
50	161	0	11	10	0	19			1	1
50	166	0	0	0	0	17			1	1
50	168	0	5	10	0	18			1	1
50	169	0	0	10	0	20			1	1
50	170	0	11	7	0	19			1	1
50	181	0	12	10	0	19			1	1
50	182	0				18			1	1
50	189	0				18			1	1
50	190	0	12	11	0	19			1	1
51	6	0	5	10	0	20	0	0	3	1
51	7	0	0	0	1	20	0	0	1	1
51	18	0	0	7		22	0	0	2	1
51	19	0	0	0	0	20	0	0	2	1
51	22	0	0	0	0	25	0	0	1	1
51	23	0	0	0	0	20	1	0	2	1
51	43	0	0	5	0	25	1	0	1	1
51	49	0	0	0	1	21	1	0	2	1
51	56	0	0	0	0	22	0	0	1	1
51	66	0	0	6	0	19			1	1
51	69	0				18			1	1
51	70	0	12	12	0	19			1	1
51	73	0	0	0	0	19			1	1
52	2	0				19	0	0	1	1
52	3	0	2	0	0	18	0	0	2	1
52	15	0	10	10	0	23	0	0	1	1
52	36	0	12	12	1	20	1	0	1	1
52	40	0	0	0	0	21	1	0	1	1
52	43	0	12	12	1	18	0	0	2	1
52	51	0	0		0	19	0	0	1	1
52	99	0	5	7	0	20	0	0	1	1
52	109	0	12	10	0	19	0	0	1	1
52	116	0	5	7	1	20	1	0	1	1
52	118	0	0	8	1	30	0	0	1	1
52	119	0	8	5	1	16	0	0	1	1
52	120	0	10	13	1	30	0	0	1	1
52	153	0	0	9	0	35	0	0	1	1
52	157	0	12	12	0	19			1	1
52	161	0	5	7	1	19			3	1
52	165	0	12	12	0	18			1	1
52	171	0	12	12	0	19			1	1
52	172	0	4	5	1	18			1	1
52	177	0	7	10	0	18			1	1
52	181	0	2	0	0	19			1	1
52	182	0	12	11	0	18			1	1
52	183	0	0	3	0	18			1	1
53	18	0	0	0	0	25	1	0	1	1
53	25	0	3	10	0	18			3	1
53	29	0	0	0	0	20			1	1
54	7	0	0	0	1	25	1	0	2	1
54	11	0	0	0	1	18	1	0	1	1
54	13	0	0	3	0	18	0	0	1	1
54	19	0	0	0	0	16	1	0	1	1
54	31	0	0	0	1	22	0	0	2	1
54	33	0	0	0	1	19	0	0	1	1
54	35	0	0	0	1	30	1	0	1	1
54	36	0	0	0	0	18	1	0	2	1
54	39	0	0	2	1	25	1	0	1	1
54	49	0	0		1	15	0	0	3	1
54	56	0	0	0	0	20	0	0	1	1
54	59	0	0	4	0	16	1	0	2	1
54	64	0	0	0	0	20	0	0	1	1
54	66	0	0	0	0	20	0	0	1	1
54	71	0				24	0	0	1	1
54	73	0	0	0	0	21	0	0	2	1
54	80	0	0	6	0	18	0	0	3	1
54	87	0	0	4	1	19	0	0	2	1
54	94	0	0	0	1	16	1	0	1	1
54	100	0	0	7	0	22	1	0	1	1
54	101	0				20	0	0	1	1
54	113	0	0	5	0	18			2	1
54	125	0	0	0	0	16			1	1
54	126	0	6	6	0	18			1	1
54	127	0	0	6	0	15			1	1
54	133	0	2	0	0	20			1	1
54	140	0	0	6	0	19			1	1
55	3	1	0	0	1	27	1	0	1	1
55	8	1	0	0	1	20	1	0	2	1
55	10	1	7	12	0	22	1	1	1	1
55	13	1	0	0	0	20	1	0	1	1
55	15	1	0	0	0	20	0	0	1	1
55	17	1	0	12	0	19	0	0	1	1
55	27	1	7	0	0	25	1	0	1	1
55	49	1	3	0	0	18	0	0	2	1
55	52	1	0	0	0	25	0	0	1	1
55	57	1	0	0	0	25	1	0	1	1
55	59	1	0	4	0	27	0	0	2	1
55	87	1	0	0	0	25	1	0	2	1
55	91	1	15	16	0	23	0	0	1	1
55	96	1	12	6	0	18	0	0	1	1
55	97	1	0	6	1	21	0	0	2	1
55	105	1	7	0	0	25	1	0	1	1
55	109	1	10	10	0	27	1	0	1	1
55	110	1	5	0	0	21	1	0	1	1
55	113	1	12	12	0	24	1	0	2	1
55	115	1	0	0	0	25	1	0	1	1
55	117	1	0	0	0	25	0	0	2	1
55	120	1	0	10	1	26	0	0	2	1
55	124	1	10	12	1	25	1	0	2	1
55	134	1	4	12	0	25	0	0	2	1
55	156	1	0	7	0	28	1	0	1	1
55	163	1	12	12	0	25	1	0	1	1
55	167	1	0	5	0	28	1	0	1	1
55	180	1	5	0	0	22	0	0	1	1
55	207	1	4	3	0	25	1	0	1	1
55	211	1	12	15	0	22	0	0	1	1
55	213	1	0	12	0	25	1	0	1	1
55	228	1	0	5	1	22	1	0	1	1
55	234	1	12	10	1	22			1	1
55	237	1	12	12	0	22			2	1
55	238	1				25			2	1
55	240	1	0	0	0	20			1	1
55	241	1	0	7	1	27			2	1
55	242	1	0	0	0	25			1	1
55	244	1	15	10	0	18			1	1
55	245	1	0	10	0	20			1	1
55	246	1	10	7	1	18			1	1
55	247	1	0	10	1	25			1	1
55	249	1	10	11	0	18			1	1
55	250	1	3	5	0	19			1	1
55	251	1	0	0	0	18			1	1
55	259	1	2	10	0	27			1	1
55	261	1	10	10	0	18			1	1
55	262	1	15	10	0	19			1	1
55	263	1	10	4	0	19			1	1
55	265	1	5	6	0	25			1	1
55	266	1	0	10	0	20			1	1
55	267	1	7	12	0	23			1	1
55	269	1	0	10	0	20			1	1
55	273	1	9	15	0	23			1	1
55	274	1	0	0	1	22			1	1
55	275	1	8	0	1	25			1	1
55	278	1	5	15	0	20			1	1
56	4	0	0	0	1	20	1	0	2	1
56	18	0	0	15	0	30	0	0	2	1
56	28	0	0	5	1	30	1	1	2	1
56	44	0	5	0	1	19	0	0	2	1
56	77	0	0	0	0	20	1	0	1	1
56	152	0	0	5	1	20	1	1	2	1
56	160	0	2	0	0	38	1	0	1	1
56	171	0	0	9	0	22	1	0	2	1
56	172	0	0	12	0	23	0	0	2	1
56	177	0	0	7	0	18			1	1
56	180	0	0	0	0	17			1	1
56	181	0	0	0	0	18			1	1
56	186	0	0	0	0	18			1	1
56	187	0	5	0	0	18			1	1
57	20	1	0	10	1	26	0	0	1	1
57	51	1				35	1	1	1	1
57	66	1	0	10	1	20	1	0	1	1
57	72	1	15	10	0	28	0	0	2	1
57	79	1	12	10	0	28	0	0	1	1
57	85	1	12	12	0	27			1	1
57	98	1	0	10	0	19			1	1
58	52	0	2		1	20	0	0	1	1
58	53	0	7	10	0	15	0	0	2	1
58	58	0	12	14	1	19	1	0	1	1
58	120	0	0	10	0	23	0	0	1	1
58	129	0	10	15	0	20	0	0	1	1
58	137	0	10	10	1	20	0	0	2	1
58	156	0	15	15	0	22	0	0	1	1
58	222	0	10	12	0	20	0	0	2	1
58	224	0	0	0	1	18	0	0	2	1
58	234	0	0	6	0	35	1	0	1	1
58	244	0	10	12	0	18	0	0	1	1
58	249	0	10	10	0	23	1	0	1	1
58	259	0	9	12	0	18	0	0	2	1
58	276	0	0	12	1	30	1	0	1	1
58	314	0	0	10	0	18	0	0	1	1
58	337	0	0	10	0	20	1	0	1	1
58	341	0	7	0	0	20	0	0	2	1
58	346	0	10	10	0	18	0	0	2	1
58	354	0	15	10	0	23	1	0	1	1
58	357	0	7	2	0	22	0	0	1	1
58	361	0	9	12	0	19	0	0	2	1
58	362	0	0	0	0	18	0	0	1	1
58	363	0	12	17	0	26	0	0	1	1
58	364	0	10	10	1	18			1	1
58	365	0	10	10	0	17			1	1
58	366	0	7	10	1	18			2	1
58	367	0	12	12	0	20			1	1
58	368	0	14	12	1	21			2	1
58	369	0	15	17	0	23			1	1
58	371	0	0	10	0	24			1	1
58	372	0	10	10	1	20			2	1
58	375	0	12	15	0	18			1	1
58	376	0	10	7	0	19			1	1
58	377	0	9	16	0	19			1	1
58	378	0	9	10	0	18			1	1
58	381	0	0	10	1	20			1	1
58	382	0	15	7	0	20			1	1
58	385	0	12	12	0	20			1	1
58	398	0	13	11	0	19			1	1
58	399	0	12	5	0	20			1	1
59	37	1	5	5	0	20	0	0	1	1
59	47	1	5	8	1	20	1	0	1	1
59	48	1	9	7	0	20	1	0	2	1
59	65	1	0	11	0	23			1	1
59	69	1	0	10	0	21			1	1
59	73	1	4	7	0	18			1	1
59	81	1	10	15	0	18			1	1
60	48	0	0	0	1	18	1	1	2	1
60	53	0	0	7	0	20	0	0	1	1
60	57	0	0	0	1	30	0	0	1	1
60	95	0	0	10	0	20	1	0	1	1
60	97	0	7	6	0	18	0	0	1	1
60	112	0	0	0	0	16	1	0	1	1
60	116	0	6	5	1	20	1	0	1	1
60	118	0	10	10	0	22	0	0	1	1
60	119	0	5	10	1	21	0	0	1	1
60	126	0	0	0	0	20	0	0	1	1
60	165	0	13	12	0	18			1	1
60	170	0	0	0	1	18			1	1
60	171	0	8	0	0	28			1	1
60	173	0	9	10	0	20			1	1
60	177	0	4	7	0	18			2	1
60	181	0	10	14	0	20			1	1
60	182	0	7		0	19			1	1
60	184	0	0	9	1	19			1	1
60	189	0	15	10	0	21			1	1
60	190	0	9	5	0	18			1	1
60	201	0	0	7	0	18			1	1
61	17	1	9	10	0	18	0	0	1	1
61	20	1	0	0	0	19	0	0	2	1
61	54	1	10	15	1	20	1	1	1	1
61	59	1				30	1	0	1	1
61	61	1				20	0	0	1	1
61	100	1	0	7	1	20	0	0	1	1
61	106	1	8	10	1	20	0	0	3	1
61	115	1	7	3	1	20	0	0	3	1
61	118	1	0	0	1	25	1	0	1	1
61	119	1	12	15	0	20	1	0	1	1
61	122	1	5	6	1	18	0	0	2	1
61	134	1	3	0	0	20	0	0	1	1
61	147	1				18	0	0	1	1
61	173	1	0	10	1	20	0	0	2	1
61	182	1	0	7	0	20	0	0	1	1
61	188	1	8	10	1	20	0	0	2	1
61	190	1	0	0	0	20	0	0	1	1
61	194	1	0	0	1	25	0	0	1	1
61	205	1	10	12	1	25	0	0	1	1
61	226	1	12	8	0	20			1	1
61	233	1	0	0	0	19			1	1
61	236	1	0	6	1	19			1	1
61	237	1	9	9	0	19			1	1
61	238	1				18			1	1
61	239	1				19			1	1
61	240	1	10	10	0	18			1	1
61	241	1				20			1	1
61	242	1	0	0	0	22			2	1
61	243	1	0	5	0	20			1	1
61	246	1	7	5	0	21			1	1
61	247	1	0	0	0	20			1	1
61	249	1	10	12	0	16			1	1
61	251	1	10	7	0	19			1	1
61	297	1	0	4	0	20			1	1
61	301	1	4	0	1	25			1	1
61	305	1	0	0	0	20			1	1
61	311	1	7	7	0	18			1	1
61	313	1	0	5	0	20			1	1
61	317	1	7	7	0	19			1	1
61	321	1	12	13	1	18			1	1
62	6	1	0	12	0	23	1	0	2	1
62	12	1	3	9	0	20	1	0	1	1
62	15	1	17	15	0	27	1	0	1	1
62	18	1	3	0	1	20	1	0	2	1
62	25	1	0	7	0	21	1	0	2	1
62	32	1	2	4	0	20	0	0	3	1
62	34	1				19	0	0	1	1
62	37	1	0	0	0	30	0	0	1	1
62	40	1	0	5	1	20	1	0	2	1
62	45	1	0	3	0	20	1	0	1	1
62	50	1	0	8	1	21	0	0	2	1
62	54	1	0	0	0	20	1	0	1	1
62	59	1	0	0	0	22	0	0	1	1
62	62	1	4	15	0	20	1	0	1	1
62	65	1				19	1	0	1	1
62	68	1	0	12	1	23	1	0	2	1
62	96	1	0	0	0	24	1	0	1	1
62	97	1				27	1	0	1	1
62	107	1	0	0	0	25	1	0	2	1
62	117	1	12	17	0	20			2	1
62	118	1	0	0	0	19			1	1
62	121	1	0	0	0	20			1	1
62	123	1	0	0	0	20			1	1
62	125	1	0	15	0	21			1	1
63	25	1	0	5	0	30	0	0	1	1
63	28	1	5	7	0	28	0	0	1	1
63	35	1	0	7	0	25	0	0	1	1
63	42	1	0	12	0	32	0	0	1	1
63	52	1				22	1	0	1	1
63	54	1	0	15	1	22	0	0	1	1
63	58	1	0	8	0	28	0	0	1	1
63	62	1	0	0	0	25	0	0	2	1
63	71	1	0	0	0	20	1	0	1	1
63	86	1	6	10	0	20	0	0	1	1
63	108	1	0	0	0	22	0	0	1	1
63	109	1	7	5	0	18	0	0	1	1
63	149	1	8	15	0	18			1	1
63	150	1	12	15	0	17			1	1
63	151	1	7	0	1	18			3	1
63	154	1	0	0	1	25			2	1
63	170	1				20			1	1
63	171	1	12	15	0	18			1	1
63	197	1	7	8	0	18			1	1
63	201	1	16	18	0	19			1	1
64	3	1	0	8	0	18	0	0	1	1
64	46	1	7	12	1	16			2	1
65	3	1	0	7	1	20	1	1	1	1
65	7	1	0	6	0	29	0	0	2	1
65	14	1	12	15	0	20	0	0	1	1
65	19	1	0	0	0	18	0	0	2	1
65	24	1	0	7	1	28	1	1	2	1
65	46	1	2	0	1	28	1	0	1	1
65	49	1	0	6	0	20	0	0	2	1
65	51	1	0	7	0	20	0	0	2	1
65	85	1	0	0	0	26	0	0	1	1
65	88	1	0	5	0	26	0	0	2	1
65	89	1	0	10	0	26	0	0	1	1
65	116	1	15	17	0	25			2	1
65	117	1	0	4	0	15			2	1
65	118	1	0	6	0	18			2	1
65	119	1	0	5	0	20			1	1
65	120	1	5	0	0	18			1	1
65	125	1	0	0	1	21			1	1
66	4	0	0	5	0	24	0	0	1	1
66	11	0	0	7	0	23	0	0	1	1
66	13	0	0	5	1	16	1	1	1	1
66	28	0	0	5	1	18	1	0	2	1
66	35	0	3	6	1	23	2	1	1	1
66	38	0	0	6	0	18	0	0	1	1
66	40	0	0	5	1	21	0	0	2	1
66	45	0	0	0	1	21	1	0	1	1
66	46	0	0	5	0	18	1	0	2	1
66	51	0	0	5	1	28	0	0	1	1
66	53	0				25	1	1	1	1
66	54	0	2	6	0	21	1	0	1	1
66	59	0	0	0	0	18	0	0	1	1
66	60	0	0		1	22	0	0	2	1
66	69	0	3	0	1	17	0	0	1	1
66	245	0	0	4	0	20			1	1
66	248	0	0	0	0	18			1	1
66	253	0	3	0	0	20			1	1
67	3	1	0	6	0	18	0	0	2	1
67	7	1	6	0	0	18	1	0	1	1
67	11	1	0	0	1	18	0	0	1	1
67	30	1	12	15	0	17	0	0	2	1
67	36	1	3	0	1	20	1	0	3	1
67	47	1	4	0	1	22	1	0	1	1
67	49	1	0	0	0	18	1	0	1	1
67	61	1	0	0	1	16	0	0	2	1
67	75	1	10	12	0	16	1	0	1	1
67	81	1	0	5	0	20	1	0	1	1
67	83	1	10	12	0	18	0	0	2	1
67	85	1	0	0	1	20	0	0	2	1
67	104	1	0	0	0	20	1	0	1	1
67	110	1	0	0	1	19	1	1	2	1
67	120	1	10	0	0	16	1	0	2	1
67	121	1	10	10	0	18	0	0	1	1
67	123	1	5	0	1	16	1	0	2	1
67	126	1	12	12	0	18	0	0	1	1
67	149	1	5	5	1	18	0	0	2	1
67	153	1	0	0	0	19	0	0	1	1
67	158	1	10	6	0	18	0	0	1	1
67	166	1				23	1	0	1	1
67	199	1	5	10	1	20	0	0	2	1
67	311	1	12	17	0	19	0	0	1	1
67	314	1	0	0	0	31	0	0	1	1
67	317	1	0	0	0	30	0	0	1	1
67	319	1	0	0	1	22	0	0	1	1
67	321	1	0	5	0	32	0	0	1	1
67	328	1	0	5	1	19	0	0	1	1
67	329	1	7	10	0	18	0	0	2	1
67	330	1	0	0	0	39	0	0	1	1
67	334	1	0	0	0	19	0	0	2	1
67	337	1	0	0	0	19	0	0	1	1
67	367	1	0	0	0	23	0	0	1	1
67	370	1	0	0	0	26	1	0	1	1
67	380	1	0	11	1	25	0	0	1	1
67	388	1	4	0	0	18	0	0	2	1
67	396	1	0	7	0	25	1	0	1	1
67	399	1	9	7	0	20	0	0	1	1
67	411	1	0	0	0	28	1	0	1	1
67	417	1	12	10	0	25	0	0	1	1
67	438	1	0	0	0	19	0	0	1	1
67	475	1				23	0	0	1	1
67	476	1	7	7	0	27	0	0	1	1
67	485	1	0	0	0	21	0	0	2	1
67	492	1	0	5	0	28	0	0	1	1
67	505	1	0	0	0	15	0	0	2	1
67	506	1				16	0	0	3	1
67	507	1	12	10	1	19	0	0	2	1
67	508	1	0	5	0	14	0	0	2	1
67	509	1	10	5	0	19	0	0	1	1
67	510	1	0	10	0	20			1	1
67	511	1	7	10	0	20			1	1
67	513	1	10	0	0	18			2	1
67	517	1	0	0	0	18			1	1
67	518	1	5	8	0	19			1	1
67	520	1	0	0	0	18			1	1
67	522	1	0	0	0	19			1	1
67	525	1	0	0	0	18			1	1
67	529	1	0	12	0	20			1	1
67	530	1	0	0	0	19			1	1
67	532	1	12	12	0	19			1	1
67	535	1	7	11	0	19			1	1
67	536	1	9	8	0	17			1	1
67	537	1	0	0	1	19			3	1
67	555	1	0	0	0	21			1	1
67	564	1	9	10	0	17			1	1
68	6	1	0	8	0	18	1	0	2	1
68	11	1	0	10	0	18	1	0	1	1
68	14	1				18	1	0	1	1
68	16	1	5	6	1	19	1	0	1	1
68	43	1	5	0	0	18	1	0	1	1
68	46	1	0	2	1	30	0	0	1	1
68	48	1				19	0	0	1	1
68	53	1	0	6	1	18	0	0	2	1
68	71	1	0	0	0	19	1	0	1	1
68	76	1	0	8	1	19	0	0	1	1
68	77	1	7	12	0	20	1	0	2	1
68	82	1	0	0	0	19	1	0	1	1
68	85	1				19	1	0	1	1
68	86	1	0	0	0	18	0	0	1	1
68	93	1	0	0	1	18	0	0	2	1
68	104	1	0	5	0	18	0	0	1	1
68	112	1	0	0	1	18	0	0	1	1
68	124	1	0	0	0	18	0	0	2	1
68	127	1	0	0	0	20	0	0	1	1
68	137	1	10	12	1	18	1	0	2	1
68	138	1	0	0	1	18	1	0	1	1
68	139	1	4	0	0	18	0	0	1	1
68	140	1	0	0	1	20	1	0	2	1
68	141	1	0	0	0	19	1	0	1	1
68	144	1	0	0	0	19	1	0	1	1
68	145	1	6	0	1	18	0	0	2	1
68	153	1	15	12	0	20			1	1
68	154	1	0	0	1	18			4	1
68	157	1	5	0	0	18			1	1
68	161	1	8	10	0	18			2	1
68	169	1	0	0	0	18			1	1
68	185	1				18			1	1
69	43	1	0	7	0	28	0	0	1	1
69	44	1	0	0	0	22	0	0	2	1
69	62	1	0	5	1	25	0	0	2	1
69	68	1				35	0	0	1	1
69	84	1	9	0	1	25	0	0	1	1
69	85	1	0	4	0	27	0	0	1	1
69	86	1	0	0	0	22	0	0	1	1
69	88	1				22	0	0	1	1
69	96	1	0	0	1	22	1	0	1	1
69	107	1	0	10	0	25	0	0	1	1
69	114	1	0	0	1	25	1	1	3	1
69	117	1	0	12	0	25	0	0	1	1
69	119	1	0	7	1	19	0	0	2	1
69	127	1	0	7	1	27	1	0	1	1
69	128	1	5	10	1	22	0	0	1	1
69	154	1	0	0	1	20	1	0	1	1
69	158	1	0	12	0	25	1	0	1	1
69	179	1	0	0	0	25	0	0	1	1
69	182	1	0	7	0	20	1	0	3	1
69	203	1	0	8	0	21	1	0	1	1
69	204	1	0	0	0	21	1	0	2	1
69	206	1	0	0	1	25	1	0	1	1
69	213	1				20	1	0	1	1
69	224	1	0	0	0	18	1	0	2	1
69	225	1	0	0	0	20	0	0	1	1
69	247	1	0	10	1	20	1	0	1	1
69	265	1	0	7	1	29	1	0	3	1
69	267	1	0	0	0	20	1	0	1	1
69	269	1	0	5	0	18			1	1
69	271	1	0	10	0	18			2	1
69	272	1	0	15	0	19			1	1
69	273	1	6	0	0	19			1	1
69	277	1	3	0	0	18			1	1
69	281	1	10	7	0	16			1	1
69	282	1	15	17	0	20			1	1
69	283	1	0	12	0	16			1	1
69	284	1	0	0	0	16			1	1
69	285	1	5	7	0	16			1	1
69	286	1	0		0	18			1	1
69	289	1	0	0	0	18			1	1
69	313	1	0	7	0	18			1	1
70	12	1	0	12	0	30	0	0	1	1
70	17	1	0	15	1	25	0	0	2	1
70	44	1	0	12	1	30	1	0	1	1
70	61	1	8	5	1	30	0	0	1	1
70	66	1	4	7	0	23	0	0	1	1
70	69	1				27	0	0	3	1
70	77	1	12	12	0	20	0	0	1	1
70	94	1	4	0	0	23	0	0	2	1
70	104	1	3	8	0	26	0	0	1	1
70	119	1	9	10	1	20	1	0	2	1
70	127	1	0	9	0	25	0	0	1	1
70	151	1	0	0	1	22	0	0	1	1
70	162	1	0	7	0	26	1	0	1	1
70	166	1	0	12	0	25	0	0	1	1
70	167	1	0	9	0	23	1	0	1	1
70	169	1				26	0	0	1	1
70	177	1	2	9	0	29	0	0	2	1
70	188	1	6	3	0	23	1	0	2	1
70	206	1	0		1	26	1	0	2	1
70	230	1	0	0	1	26	1	0	2	1
70	241	1	10		1	18			2	1
70	242	1	16	16	0	19			1	1
70	243	1	0	16	0	18			2	1
70	244	1	10	11	0	19			3	1
70	246	1	0	11	1	20			1	1
70	247	1	6	4	1	20			1	1
70	254	1	9	10	0	20			1	1
70	255	1	0	9	1	20			1	1
70	256	1	9	11	0	20			1	1
70	257	1	12	14	0	23			1	1
70	261	1	12	8	0	19			1	1
70	265	1	10	7	0	17			1	1
70	268	1	9	10	0	18			1	1
71	1	0	12	16	0	19	0	0	2	1
71	7	0	0	0	1	22	0	0	1	1
71	8	0	14	15	1	20	0	0	1	1
71	9	0	0	7	0	25	0	0	1	1
71	11	0	16	18	0	26	1	0	1	1
71	18	0	3	0	1	25	1	0	1	1
72	5	1	10	10	0	18	1	0	1	1
72	15	1	7	10	0	20	0	0	2	1
72	20	1	3	7	0	20	1	0	1	1
72	37	1	0	0	0	20	1	0	1	1
72	41	1	10	12	0	20	0	0	2	1
72	44	1	0	0	1	28	1	0	2	1
72	57	1	5	6	0	29	1	0	1	1
72	58	1	0	5	0	38	1	0	1	1
72	62	1				21	1	0	1	1
72	70	1	0	0	1	21	1	0	1	1
72	71	1	0	0	0	22	0	0	1	1
72	79	1	5	0	1	25	1	0	1	1
72	89	1	10	10	1	22	1	1	2	1
72	105	1	12	7	0	26	0	0	1	1
72	119	1	10	10	0	24	0	0	1	1
72	122	1	10	7	0	25	0	0	2	1
72	127	1	7	10	1	21	0	0	2	1
72	138	1	0	0	1	25	0	0	1	1
72	139	1	0	0	0	28	0	0	1	1
72	140	1	0	0	0	27	0	0	1	1
72	145	1				18			1	1
72	149	1				19			1	1
72	150	1	10	10	0	19			1	1
72	153	1	10	9	0	18			1	1
72	189	1	15	17	0	20			1	1
72	193	1	0	0	0	18			1	1
72	197	1	0	0	0	20			1	1
72	209	1	10	0	0	19			1	1
72	211	1	9	5	0	18			1	1
73	2	0	7	5	1	18	0	0	2	1
73	7	0	10	10	0	18	0	0	2	1
73	15	0	0	7	0	20	0	0	1	1
73	17	0	0	0	0	22	1	0	1	1
73	26	0	10	10	1	20	1	0	1	1
73	35	0	3	0	0	18	0	0	2	1
73	39	0	3	4	0	18	0	0	1	1
73	49	0	0	0	0	23	0	0	1	1
73	77	0				25	1	0	1	1
73	82	0	0	0	0	18	0	0	2	1
73	104	0				25	0	0	1	1
73	109	0				30	1	0	1	1
73	110	0	0	0	0	20	1	0	2	1
73	128	0	10	7	1	18	1	0	1	1
73	137	0	5	7	1	22	0	0	1	1
73	148	0	7	5	0	20	1	0	2	1
73	150	0	10	12	0	18	0	0	1	1
73	182	0	4	3	1	18	1	0	2	1
73	214	0	0	0	0	17	0	0	1	1
73	216	0	6	0	0	16	0	0	1	1
73	219	0				18			1	1
73	221	0	10	10	0	17			1	1
73	222	0	12	11	0	18			1	1
73	225	0	0	0	0	17			1	1
73	230	0	0	0	0	17			1	1
73	231	0	8	8	0	17			1	1
73	232	0	3	7	1	20			2	1
73	233	0	0	7	0	20			1	1
73	235	0	0	12	0	18			1	1
73	241	0	4	3	0	18			1	1
73	242	0	2	5	0	18			1	1
73	246	0	8	12	0	15			1	1
73	250	0	12	10	1	20			3	1
73	252	0				18			2	1
74	5	1	0	0	1	19	0	0	3	1
74	9	1	12	13	0	21	1	0	1	1
74	21	1	10	7	0	18	0	0	1	1
74	33	1	5	15	0	21	0	0	2	1
74	41	1	10	10	1	20	0	0	1	1
74	52	1	5	9	0	24	0	0	1	1
74	57	1	0	0	0	33	0	0	1	1
74	83	1	7	7	0	27	0	0	2	1
74	88	1	10	7	0	23	0	0	2	1
74	97	1	0	3	0	30	1	0	2	1
74	113	1	15	16	0	25	0	0	1	1
74	122	1	15	16	0	32	0	0	1	1
74	133	1	0	6	0	19			2	1
74	135	1	5	0	0	19			1	1
74	138	1	10	10	0	19			2	1
74	141	1	15	12	0	23			1	1
74	142	1	7	0	0	22			1	1
74	143	1	12	10	0	22			1	1
74	145	1	15	12	0	22			1	1
74	149	1	0	8	0	17			2	1
74	155	1	15	17	0	22			1	1
74	161	1	12	10	0	21			1	1
75	12	1	0	0	0	28	0	0	1	1
75	20	1	0	0	0	20	0	0	1	1
75	27	1	0	0	1	22	0	0	1	1
75	29	1	0	5	0	25	1	1	1	1
75	30	1				20	0	0	2	1
75	35	1	2	4	1	25	0	0	3	1
75	36	1	0	0	1	18	1	1	1	1
75	37	1	11	10	0	19			1	1
75	41	1	0	0	0	20			1	1
75	45	1	0	0	1	18			1	1
75	49	1	0	6	1	18			1	1
75	53	1	11	11	0	20			1	1
75	54	1	10	12	0	21			1	1
75	57	1	11	10	0	19			1	1
76	59	1	0	13	0	21	0	0	1	1
76	60	1	5	10	0	19	0	0	1	1
76	72	1	4	12	1	25	0	0	2	1
76	85	1	9	10	1	19	0	0	1	1
76	87	1	0	0	1	25	0	0	1	1
76	104	1				25	0	0	1	1
76	109	1	0	5	1	29	1	0	2	1
76	128	1	15	12	1	18	0	0	3	1
76	129	1	0	7	0	20	1	0	2	1
76	145	1	0	2	0	18	0	0	1	1
76	150	1	0	5	0	22	0	0	1	1
76	165	1	0	7	0	18	0	0	1	1
76	169	1	10	10	0	25	0	0	1	1
76	173	1	0	9	1	18	0	0	2	1
76	177	1	7	10	0	20			2	1
76	181	1	5	10	0	20			1	1
76	182	1	0	5	0	21			1	1
76	187	1	10	15	0	20			1	1
76	188	1	12	11	0	20			1	1
76	193	1	10	5	0	18			1	1
77	8	0	0	0	1	18	1	0	2	1
77	14	0	0	0	1	18	1	1	2	1
77	16	0	0	10	1	20	1	0	2	1
77	27	0	0	5	1	16	0	0	2	1
78	6	1	3	4	0	28	1	0	1	1
78	8	1	0	10	1	24	1	0	1	1
79	15	1				21	0	0	1	1
79	17	1	0	0	0	31	0	0	1	1
79	20	1	3	3	0	19	0	0	2	1
79	22	1	0	0	1	22	0	0	2	1
79	23	1	0	0	1	20	0	0	2	1
79	27	1	0	0	1	28	0	0	1	1
79	47	1	5	6	1	20	0	0	2	1
79	48	1	0	0	0	20	0	0	1	1
79	50	1	0	5	0	25	0	0	1	1
79	53	1	5	0	0	22	1	0	1	1
79	56	1	5	6	1	20	1	0	2	1
79	67	1	4	9	0	18	0	0	1	1
79	68	1	0	0	1	21	1	0	2	1
79	83	1	0	0	1	24	0	0	1	1
79	85	1	0	3	0	20	0	0	2	1
79	90	1	4		1	19	0	0	2	1
79	100	1	0	5	0	17			1	1
79	101	1				18			1	1
79	102	1	0	3	0	20			1	1
79	103	1	0	0	0	18			1	1
79	105	1	4	0	0	18			1	1
79	109	1	7	0	0	20			1	1
79	110	1	0	0	1	21			2	1
79	113	1	8	10	0	19			1	1
79	114	1	7	10	0	18			1	1
79	117	1	0	0	0	16			1	1
79	121	1	7	7	0	19			1	1
79	122	1	3	10	0	23			1	1
79	126	1	12	12	0	20			1	1
80	6	1	0	0	0	25	1	0	1	1
81	4	1	0	0	0	20	0	0	1	1
81	5	1	0	0	1	19	1	0	3	1
81	18	1	0	0	1	19	1	0	1	1
81	37	1	0	9	1	20	0	0	2	1
81	46	1	0	15	1	18	0	0	2	1
81	47	1	0	0	0	23	0	0	1	1
81	57	1	0	0	0	20	0	0	1	1
81	59	1	0	10	1	18	0	0	2	1
81	65	1	3	5	1	20	0	0	2	1
81	72	1	4	0	0	20	0	0	1	1
81	85	1	0	0	0	23	0	0	1	1
81	88	1	0	9	1	19	0	0	2	1
81	107	1	0	6	0	23	0	0	2	1
81	108	1	6	7	1	19	0	0	3	1
81	109	1	6	0	0	23	0	0	1	1
81	117	1	0	0	0	23	0	0	1	1
81	119	1	0	0	0	21	0	0	2	1
81	120	1	0	0	0	19	0	0	2	1
81	144	1	0	6	0	20	0	0	2	1
81	149	1	10	9	1	18			3	1
81	151	1	0	7	0	19			2	1
81	237	1	0	6	0	18			1	1
81	238	1	0	5	1	19			1	1
81	242	1	0	7	0	18			1	1
81	246	1	7	11	0	18			1	1
81	247	1				17			1	1
81	251	1	7	10	0	19			1	1
81	257	1	12	17	0	18			1	1
82	14	0	0	0	1	23	1	0	2	1
82	46	0	0	0	0	20	1	0	1	1
82	55	0	0	10	1	19	0	0	2	1
82	61	0	0	12	1	20	0	0	2	1
82	64	0	0	0	0	20	1	0	1	1
82	80	0	9	9	0	19	0	0	1	1
82	82	0	8	0	0	20	1	0	1	1
82	85	0	7	0	0	19	1	0	2	1
82	94	0	5	12	0	18	1	0	1	1
82	123	0	4	9	0	20	1	0	3	1
82	133	0	0	10	1	17			2	1
82	134	0	9	10	0	18			2	1
82	135	0	7	6	0	17			2	1
82	294	0	0	0	0	19			1	1
82	297	0	0	12	0	19			1	1
83	6	0	6	0	0	20	0	0	1	1
83	11	0	9	15	1	16	0	0	3	1
83	12	0	12	11	0	20	0	0	2	1
83	29	0	0	0	0	17	0	0	2	1
83	30	0	0	0	0	22	1	0	1	1
83	31	0	0	4	0	25	1	0	1	1
83	35	0	0	10	1	25	0	0	2	1
83	36	0	0	0	0	20	1	0	1	1
83	38	0	0	10	1	20	0	0	2	1
83	40	0	0	0	0	18	0	0	1	1
83	41	0	0	10	0	20	0	0	1	1
83	42	0	0	5	0	20	1	0	1	1
83	45	0	0	7	1	20	1	1	4	1
83	79	0	11	12	0	21	1	0	1	1
83	81	0	0	0	0	17	0	0	1	1
83	91	0	0	10	0	20	0	0	1	1
83	124	0	0	0	1	20	0	0	1	1
83	141	0	5	10	0	30	1	0	1	1
83	145	0	7	3	0	29	0	0	2	1
83	166	0	0	0	0	26	1	0	1	1
83	167	0	0	0	0	28	1	0	1	1
83	195	0				25	0	0	1	1
83	199	0	7	12	0	26	0	0	1	1
83	252	0	5	10	0	25	1	0	1	1
83	276	0	0	0	0	20	1	0	1	1
83	278	0	0	12	1	25	1	0	1	1
83	286	0	0	0	0	19	1	0	1	1
83	292	0	0	0	0	18			1	1
83	293	0				20			1	1
83	294	0				16			1	1
83	297	0	0	0	0	18			1	1
83	298	0	0	12	0	18			2	1
83	303	0	5	9	0	16			1	1
83	304	0	0	5	0	16			1	1
83	305	0	0	0	0	17			1	1
83	307	0	0		0	18			1	1
83	308	0	0	10	0	20			1	1
83	313	0	0	0	0	18			1	1
83	314	0	5	10	0	18			1	1
83	318	0	6	7	0	18			1	1
83	321	0	12	12	0	19			1	1
83	322	0	0	15	0	20			1	1
84	3	0	7	0	1	19	1	0	2	1
84	5	0				25	1	0	1	1
84	6	0	0	0	1	23	0	0	1	1
84	21	0	0	0	0	25	0	0	1	1
84	24	0	0	0	0	20	0	0	1	1
84	27	0	0	3	1	30	0	0	2	1
84	36	0	0	0	0	25	1	0	1	1
84	40	0	0	0	1	25	0	0	2	1
84	43	0	0	0	0	23	1	0	2	1
84	46	0	10	7	0	25	1	0	1	1
84	47	0	10	10	0	30	1	0	1	1
84	48	0	0	5	0	25	1	0	1	1
84	53	0	0	16	1	20	0	0	2	1
84	55	0	4	9	0	20	0	0	2	1
84	66	0	0	0	0	25	1	0	1	1
84	68	0	0	0	1	30	1	0	1	1
84	87	0	0	12	1	20	0	0	2	1
84	97	0	10	10	0	25	1	0	1	1
84	98	0	7	7	1	28	0	0	1	1
84	111	0	10	12	0	19			1	1
84	113	0	0	0	0	21			1	1
84	114	0	0	12	1	20			2	1
84	117	0	12	12	0	21			1	1
84	121	0	0	6	0	18			1	1
84	122	0	0	10	0	18			1	1
84	123	0	0	0	0	18			1	1
84	125	0				19			2	1
84	126	0	10	12	0	19			1	1
84	127	0	0	10	0	19			1	1
85	4	1	0		0	18	0	0	2	1
85	28	1				18	0	0	1	1
85	37	1	7	0	1	20	0	0	2	1
85	46	1	0	0	0	30	0	0	1	1
85	53	1	0	3	0	22	0	0	1	1
85	71	1	12	15	0	25	0	0	1	1
85	76	1	6	10	0	18	0	0	1	1
85	86	1	0	6	0	18	0	0	1	1
85	89	1	0	7	0	18	0	0	1	1
85	93	1	0	7	0	27	0	0	1	1
85	100	1	0	11	1	18	0	0	2	1
85	110	1	11	10	0	26	0	0	1	1
85	113	1	0	10	0	19	0	0	1	1
85	114	1	7	12	0	22	0	0	1	1
85	120	1	0	7	0	20	0	0	2	1
85	126	1	5	7	0	18	0	0	2	1
85	130	1	5	12	0	18	0	0	1	1
85	134	1	0	7	1	20	1	0	1	1
85	140	1	7	0	0	19	0	0	2	1
85	145	1	5	10	0	20	0	0	1	1
85	146	1	2	7	0	18	0	0	2	1
85	147	1	7	7	0	28	0	0	2	1
85	148	1	7	11	0	17	0	0	1	1
85	158	1	0	0	0	20	0	0	1	1
85	172	1	0		1	25	0	0	1	1
85	177	1	9	7	1	22	0	0	2	1
85	182	1	7		1	19	0	0	1	1
85	184	1	0	0	0	20	1	0	1	1
85	192	1	5	8	0	18	0	0	1	1
85	210	1	0	0	0	22	0	0	1	1
85	212	1	8	5	0	20	0	0	2	1
85	215	1	6	0	0	22			1	1
85	216	1	0	0	0	18			1	1
85	217	1	9	11	0	20			2	1
85	218	1	6	0	0	19			1	1
85	219	1	5	7	0	19			2	1
85	220	1				18			1	1
85	222	1	0	15	1	19			1	1
85	225	1	9	10	0	19			1	1
85	226	1	7	7	0	19			1	1
85	227	1	10	11	0	20			1	1
85	228	1	4	10	0	20			1	1
85	229	1	6	0	0	18			1	1
85	230	1	3	5	1	19			1	1
85	231	1	15	11	0	20			1	1
85	233	1	16	16	0	19			1	1
85	235	1	5	10	0	19			1	1
85	238	1	16	15	0	23			1	1
85	243	1	11	15	0	26			1	1
85	245	1	8	6	0	20			1	1
85	246	1	5	8	0	18			1	1
85	251	1	16	17	0	22			1	1
85	253	1				17			1	1
85	254	1	12	12	0	19			1	1
86	5	0	0	17	0	25	0	0	1	1
86	17	0	10	0	0	19	0	0	1	1
86	24	0	0	10	0	19	0	0	2	1
86	26	0	7	10	0	25	1	0	1	1
86	31	0	10	10	0	20	0	0	2	1
86	33	0	0	7	0	21	0	0	1	1
86	45	0	8	12	0	29	0	0	1	1
86	108	0	4	12	1	26	0	0	2	1
86	112	0	3	0	1	20	0	0	1	1
86	115	0	0	10	1	30	0	0	2	1
86	152	0	0	9	0	20	0	0	1	1
86	172	0	0	7	1	20	0	0	1	1
86	199	0	4	2	0	23	0	0	1	1
86	202	0	13	0	0	21	0	0	2	1
86	233	0	11	12	0	21	1	0	1	1
86	251	0	0	0	1	30	0	0	1	1
86	289	0	9	10	0	18			1	1
86	290	0	0	0	0	20			1	1
86	292	0	0	0	0	20			1	1
86	293	0	14	15	0	20			1	1
86	294	0	12	10	0	18			1	1
86	295	0	12	10	0	20			2	1
86	296	0	12	10	0	20			1	1
86	297	0	12	17	0	20			1	1
86	305	0	8	0	0	18			1	1
86	306	0	4	12	0	18			1	1
86	313	0	9	10	0	19			1	1
86	315	0	6	10	0	18			1	1
86	316	0	12	15	0	20			1	1
86	318	0	0	5	1	20			1	1
87	5	1	10	15	0	24	1	0	1	1
87	8	1	0	5	0	18	0	0	2	1
87	9	1	2	9	0	17	0	0	1	1
87	12	1	0	10	0	19	1	0	1	1
87	16	1				19	0	0	1	1
87	25	1	15	17	1	23	1	1	2	1
87	27	1	10	10	1	22	0	0	3	1
87	29	1				25	0	0	1	1
87	45	1	7	15	0	20	0	0	2	1
87	60	1	0	12	0	24	0	0	1	1
87	70	1	0	10	0	25	1	0	2	1
87	81	1	0	7	0	20	0	0	1	1
87	85	1	0	0	1	25	1	0	1	1
87	86	1	0	10	0	26	1	0	1	1
87	89	1	0	0	1	26	1	0	1	1
87	99	1	0	10	0	28	0	0	1	1
87	104	1	0	12	0	22	0	0	2	1
87	110	1	0	0	0	23	1	0	1	1
87	116	1	7	7	0	22	0	0	2	1
87	123	1	9	8	1	22	0	0	2	1
87	129	1	0	4	0	20			2	1
87	131	1	0	6	0	16			1	1
87	132	1				18			1	1
87	145	1	12	15	0	23			1	1
87	149	1	15	15	0	20			1	1
87	150	1	0	17	0	20			1	1
87	157	1				22			1	1
88	2	1	0	8	1	20	2	0	1	1
88	10	1	5	5	0	21	1	0	1	1
88	27	1	6	0	0	18	0	0	2	1
88	28	1	0	0	0	35	0	0	1	1
88	31	1				26	1	0	1	1
88	37	1	0	0	0	22	1	0	1	1
88	42	1	5	10	1	18	1	0	2	1
88	49	1	4	0	0	20	0	0	1	1
88	62	1	0	0	1	21	1	1	2	1
88	71	1	10	15	1	33	0	0	1	1
88	81	1	5	10	0	19			1	1
88	82	1	0	2	0	19			1	1
88	123	1	5	10	1	21			2	1
88	277	1	5	0	0	18			2	1
88	282	1	0	0	1	20			1	1
88	287	1	9	10	0	20			2	1
88	289	1	0	0	1	22			1	1
89	1	1				28	1	0	1	1
89	5	1	9	11	0	19	0	0	2	1
89	10	1	0	11	1	20	0	0	1	1
89	18	1	0	4	0	20	0	0	1	1
89	21	1	5	7	0	25	0	0	1	1
89	22	1	3	10	0	20	1	0	1	1
89	25	1	0	0	1	20	1	0	2	1
89	31	1	3	0	0	20	0	0	1	1
89	46	1	0	0	0	20	0	0	2	1
89	49	1	5	5	1	20	0	0	3	1
89	58	1	0	9	1	20	0	0	1	1
89	65	1	0	0	0	22	1	0	1	1
89	67	1	0	5	1	22	1	0	1	1
89	74	1	3	15	0	23	1	0	1	1
89	82	1	0	0	1	21	1	0	2	1
89	93	1	0	0	1	22	1	0	2	1
89	96	1	0	0	0	22	0	0	1	1
89	105	1	0	7	1	28	0	0	1	1
89	112	1	4	0	1	23	0	0	1	1
89	114	1				25	1	0	1	1
89	118	1	0	0	0	19			1	1
89	119	1	14	10	0	20			1	1
89	125	1	0	7	0	25			1	1
89	129	1	6	3	0	22			1	1
89	130	1	5	7	0	20			1	1
[truncated: 8,550 more rows]
