# Supplementary material for: Community health promotion and medical provision for neonatal health—CHAMPION cluster randomised trial in Nagarkurnool district, Telangana (formerly Andhra Pradesh), India
Source: PLoS Med. 2017 Jul 5;14(7):e1002324. doi: 10.1371/journal.pmed.1002324 (PMC5497957; doi:10.1371/journal.pmed.1002324)
Supplement: S10 Data — (CSV) [file pmed.1002324.s010.csv]

Village_Id	Womens_ID	MonthlyID	arm	ChildGender	CauseOfDeath	AgeOfDeath
1	46	23	0	2	7	0
1	71	21	0	2	5	2
1	114	21	0	1	12	5
1	197	26	0	2	4	1
2	12	23	0	2	12	3
2	19	20	0	2	7	1
3	9	14	0	1	5	3
3	184	42	0	2	10	5
3	186	24	0	1	7	0
4	44	15	1	2	10	3
4	68	28	1	2	4	7
4	86	22	1	1	12	3
4	102	36	1	2	13	23
4	111	34	1	2	7	1
5	33	10	0	1	2	1
5	33	10	0	1	2	3
7	12	40	0	1	7	0
7	199	33	0	2	7	0
8	420	14	0	1	3	2
8	490	25	0	2	10	3
8	533	11	0	1	3	5
9	38	18	1	2	12	1
9	131	27	1	2	10	0
10	12	33	1	1	5	2
10	12	33	1	1	5	3
10	40	23	1	2	10	4
11	122	12	0	1	10	1
12	33	18	1	1
12	36	32	1	2	10	2
13	14	42	1	1	11	0
13	59	17	1	2	11	0
14	89	39	1	2	3	0
16	117	42	0	2	11	0
17	17	8	0	1	7	1
18	7	28	0	1	4	4
18	12	17	0	2	11	0
18	19	19	0	2	5	3
18	47	28	0	2	10	3
21	1	29	0	2	10	2
21	9	38	0	1	5	15
21	15	30	0	2	11	2
21	113	31	0	2	6	7
23	3	10	0	1	13	7
25	37	12	1	2	10	8
25	39	39	1	2	7	0
25	41	18	1	2	12	1
25	41	33	1	2	6	10
26	26	18	0	1	10	3
26	32	14	0	2	10	10
26	72	11	0	2
26	99	22	0	2	12	0
26	103	10	0	2	3	0
26	118	28	0	2	10	2
26	524	11	0	2	10	2
26	528	25	0	2	12	20
28	22	23	1	2	13	1
28	81	24	1	1	7	0
29	203	34	1	2	11	1
29	245	37	1	1	11	0
29	254	39	1	2	7	0
30	11	23	1	2	10	5
30	51	42	1	2	7	3
31	81	32	1	1	7	2
34	12	13	0	2	10	4
34	32	28	0	2	10	0
34	68	36	0	2	7	4
34	88	41	0	2	10	0
34	107	16	0	1	5	4
34	119	30	0	2	7	1
35	241	30	0	1	1	4
35	258	33	0	1	3	0
35	264	29	0	2	12	0
36	22	30	0	2	7	0
37	146	31	1	2	10	1
37	243	15	1	1	12	0
37	275	19	1	1	13	0
37	317	35	1	1	11	0
38	31	41	0	1	3	1
38	34	37	0	2	5	3
38	45	38	0	1	12	0
39	2	14	1	1	4	0
40	60	2	0	2	5	0
40	60	2	0	2	5	0
40	87	24	0	2	11	1
43	94	25	0	1	11	2
43	113	22	0	2	10	26
44	4	12	1	2	7	0
45	43	39	0	1	11	3
45	70	33	0	1	1	25
45	330	38	0	1	11	0
45	346	30	0	1	7	1
48	48	41	0	2	7	0
48	82	23	0	2	4	5
52	161	16	0	1	2	0
52	161	16	0	1	2	0
54	33	10	0	2	10	20
54	36	40	0	2
55	97	11	1	2	3	10
55	180	23	1	2	12	1
55	246	22	1	1	10	18
56	4	28	0	2	11	0
57	98	36	1	2	3	0
58	357	23	0	1	7	0
59	48	30	1	2	7	1
60	201	39	0	2	12	1
61	54	24	1	2	10	27
62	40	19	1	2	10	3
62	125	36	1	1	1	15
63	150	11	1	2
63	151	24	1	1	10	3
63	154	19	1	1	11	1
64	3	31	1	2	10	6
65	51	27	1	2	13	15
66	28	16	0	2	5	1
67	123	15	1	2	10	3
67	532	41	1	2	1	27
67	537	22	1	2	2	1
67	537	22	1	2	2	1
69	84	28	1	1	10	3
69	127	17	1	2	10	0
69	154	23	1	2	10	4
69	204	21	1	1	1	1
69	206	27	1	2	10	9
70	66	12	1	2
72	140	10	1	1	13	1
74	5	14	1	1	12	1
74	33	17	1	1	7	1
74	83	19	1	1	2	1
74	83	19	1	2	2	1
74	88	35	1	1	7	0
76	109	28	1	1	12	0
77	16	16	0	2	3	7
77	27	23	0	1	12	1
81	108	10	1	1	12	0
81	108	29	1	1	12	0
81	144	39	1	1	1	0
81	242	39	1	1	13	1
83	303	29	0	2	5	1
83	314	28	0	1	7	1
84	6	19	0	1	11	1
85	46	15	1	1	7	1
85	230	34	1	2	5	11
86	108	31	0	1	3	3
89	25	11	1	1	2	2
90	33	23	1	1	7	1
90	355	28	1	1	10	0
91	87	24	1	1	11	3
91	294	28	1	1	12	1
92	102	39	0	2	3	15
95	184	29	1	1	7	0
95	204	11	1	1	3	3
96	47	30	1	2	1	25
97	26	11	0
99	56	17	0	2	7	1
102	95	13	0	1	7	1
104	95	10	0	2	12	11
104	95	41	0	2	3	11
104	178	28	0	1	1	6
105	9	32	0	1	3	3
106	52	41	0	1	2	1
106	52	41	0	2	2	1
106	59	40	0	1	11	0
106	163	32	0	2	12	7
108	10	15	1	2	3	0
108	82	14	1	2
108	167	25	1	2	7	1
108	227	19	1	2	13	2
108	241	24	1	2	13	2
110	307	25	1	1	11	1
110	515	36	1	2	1	2
110	545	30	1	2	3	0
110	577	42	1	1
112	386	24	1	1	3	10
112	387	28	1	1	11	8
112	396	36	1	1	10	5
115	77	34	0	2
118	314	13	1	1	10	1
119	39	40	1	1	7	0
120	23	17	1	2	12	4
124	17	27	1	1	12	1
125	20	41	0	1
125	26	19	0	1
125	53	34	0	1	2	10
125	53	34	0	1	2	10
129	13	14	1	2	10	3
132	46	35	1	1	5	15
132	166	40	1	2	3	0
133	31	38	1	2	13	4
136	43	37	1	1	5	4
138	3	40	0	2	7	0
138	16	19	0	2	10	3
138	17	17	0	1	12	16
142	114	19	1	1	10	5
142	133	36	1	1	13	26
142	146	18	1	1
142	181	25	1	1	12	1
142	218	28	1	2	3	0
143	8	37	1	1	7	0
143	18	16	1	1	12	4
144	31	23	0	2	10	17
144	175	42	0	1	7	0
145	4	18	0	2	10	0
145	286	16	0	1	12	1
145	286	28	0	1	12	1
146	317	33	1	2	5	23
146	433	39	1	1	12	16
147	119	22	0	2	7	0
147	264	12	0	2	13	8
147	301	19	0
147	320	16	0	2	3	0
147	339	38	0	2	7	0
147	350	33	0	1	12	18
149	25	24	0	2	12	3
150	66	27	1	1	2	1
150	66	27	1	1	2	1
154	241	35	0	1	3	0
159	77	14	0	2	3	1
159	78	13	0	1	1	20
159	188	22	0	2	11	0
159	258	23	0	2	10	5
159	450	30	0	1	1	1
159	470	38	0	2	3	0
161	71	14	1	1	13	15
161	244	8	1	2	12	8
161	496	39	1	1
161	637	24	1	2	3	3
163	22	32	0	1	1	0
165	179	33	0	2	3	18
166	45	3	0	1	7	1
176	136	16	1	1	11	1
176	429	23	1	2	1	8
176	493	18	1	2	2	21
176	493	18	1	2	2	0
176	495	13	1	1	1	7
176	546	36	1	2	1	1
177	37	42	0	1	10	26
177	94	25	0	1	2	1
177	94	25	0	1	1	1
177	219	31	0	2	3	0
177	253	27	0	1	7	0
178	11	12	0	2	10	14
181	55	37	0	1	10	4
181	305	11	0	2	12	0
182	129	37	0	1	2	0
182	129	37	0	1	2	0
182	201	17	0	2	10	0
182	201	17	0	2	10	0
184	2	15	1	2	7	0
185	226	38	0	1	7	0
186	31	40	0	2	11	0
186	138	19	0	1	3	1
186	283	33	0	2	7	2
186	373	22	0	1	12	5
186	383	30	0	1	1	5
187	195	14	1	2	7	0
187	199	18	1	1	10	0
188	2	20	1	1	10	5
188	30	29	1	2	10	13
189	29	27	0	2	4	1
189	42	16	0	1	7	3
189	133	25	0	1	7	1
191	151	8	1	1	7	1
192	1	35	1	2	3	20
192	133	25	1	1	13	6
194	226	24	1	1	7	0
194	345	14	1	2	11	0
194	348	19	1	2	11	1
194	348	31	1	1	3	0
194	371	20	1	2	1	25
194	373	32	1	1	11	0
195	68	16	0	1
196	31	25	1	2	4	8
198	41	31	1	1	1	23
200	24	33	0	2	10	4
200	30	20	0	1	11	1
201	133	41	0	2	7	1
201	144	22	0	2	3	7
201	223	25	0	1	10	24
203	29	34	0	1	10	1
203	66	39	0	1	1	0
207	37	9	1	1	7	6
207	37	41	1	1	1	0
207	194	31	1	2	7	1
207	356	16	1	1	10	6
207	428	42	1	2	3	6
213	41	33	1	1	3	3
217	66	13	1	1	12	1
219	31	42	1	1	7	0
220	13	35	0	1	7	5
220	17	38	0	2	10	10
222	50	27	0	1	10	0
223	63	35	0	1	11	3
226	48	23	0	1	3	3
226	63	9	0	1	10	27
226	135	15	0	1	10	0
226	147	25	0	1	7	20
226	185	20	0	1	1	3
228	1	23	0	1	10	25
229	329	13	1	1	12	4
229	353	31	1	1	11	0
230	48	17	1	2	10	7
230	294	26	1	1	10	3
231	21	12	0	1	10	6
232	141	25	1	1	3	4
233	9	33	0	2	10	14
233	21	34	0	1	13	26
234	275	22	1	2	10	26
234	358	36	1	2	1	24
235	61	37	0	1	7	3
237	29	23	0	2	3	3
237	66	35	0	1	2	4
237	66	35	0	2	2	2
237	120	13	0	2	7	0
237	272	12	0	1	7	0
237	329	15	0	2	11	0
237	358	28	0	1	7	3
239	77	16	0	2	10	10
240	42	8	1	1	11	0
241	7	23	0	1	11	1
243	92	22	0	2	1	7
243	129	38	0	1	10	16
243	138	39	0	2	7	1
247	9	41	0	1	12	5
250	9	9	0	1	1	4
250	63	15	0	2	11	0
250	72	23	0	2	10	0
250	108	23	0	1	11	1
250	109	11	0	1	11	0
250	126	11	0	1	12	14
251	3	11	1	1	10	10
251	8	32	1	1	3	0
254	32	33	1	2	10	21
255	65	25	0	2	10	7
255	184	5	0	1	3	0
255	203	37	0	1	5	15
257	45	40	0	1	10	0
257	88	28	0	2	1	0
257	104	40	0	2	3	21
259	64	31	1	2	10	20
259	85	23	1	2
259	153	23	1	2	10	15
260	10	11	0	1	10	5
260	17	31	0	1	11	0
261	52	33	0	1	10	3
261	78	30	0	2	12	8
262	80	24	0	2	12	28
262	173	38	0	2	7	1
266	216	15	1	1	12	6
266	341	19	1	1	3	3
267	51	25	0	1	3	2
267	98	21	0	1	10	7
267	226	41	0	2	11	1
267	240	42	0	2	3	24
268	61	37	0	1	7	5
270	9	21	0	2	3	12
270	47	20	0	2	10	3
270	58	24	0	1	3	0
270	75	9	0	2	11	1
270	75	26	0	2
270	92	32	0	2	1	5
270	93	37	0	2	7	0
271	301	38	0	1	10	2
272	4	30	0	2	2	1
272	4	30	0	2	2	1
275	93	35	0	2	7	3
275	97	13	0	2	3	8
275	99	37	0	1	3	3
275	108	35	0	1	11	5
278	11	19	0	1	2	20
278	24	38	0	2	11	0
278	102	25	0	1	2	0
278	274	38	0	1	3	0
280	233	39	1	2	10	15
280	319	24	1	2	13	3
280	339	32	1	2	11	3
280	376	39	1	1	11	1
282	15	31	0	2	12	2
282	284	30	0	1
284	44	26	0	1	11	0
284	117	15	0	1	10	6
284	119	31	0	1	5	3
284	377	28	0	1
284	380	16	0	1	12	0
284	382	26	0	1	7	8
287	184	29	1	2	7	4
289	255	12	0	2	12	10
290	180	11	0	1	12	1
291	54	13	0	1	3	3
291	63	6	0	2	2	4
291	63	6	0
291	207	27	0	2	11	4
291	329	32	0	1	12	1
291	353	42	0	1	1	1
292	251	37	0	2	5	5
292	259	17	0	1	12	1
292	410	20	0	1	2	1
292	410	20	0
294	166	17	1	1	10	13
295	51	20	1	2	10	25
295	266	30	1	1	7	26
296	88	28	1	2	12	0
297	109	27	1	2	12	15
298	153	28	1	1	7	15
299	40	1	1	2	10	3
299	79	38	1	1	11	3
299	216	29	1	1	11	1
299	338	8	1	1	12	1
299	338	23	1	2	12	5
299	343	29	1	1	11	1
299	346	14	1	2	12	1
299	352	20	1	2	3	5
300	47	15	1	2	11	1
300	162	39	1	2	5	10
302	36	5	0	1	11	1
302	214	24	0	1	11	2
302	214	24	0	1	11	0
302	281	20	0	2	13	7
302	327	18	0	1	1	1
302	364	14	0	1	10	3
302	371	37	0	1	5	13
302	372	33	0	1	2	0
302	372	33	0	1	2	0
302	389	33	0	2	12	1
303	94	24	0	1	3	1
305	46	11	1	1	10	3
305	61	4	1	1	7	3
305	93	20	1	1	5	7
306	25	18	1	1	3	3
307	210	23	1	1	13	8
307	308	15	1	1	12	3
307	507	5	1	2	5	5
307	565	38	1	2	10	2
308	205	23	1
311	497	17	0	1	1	10
313	62	38	1	1	10	0
314	78	38	1	2	2	17
315	73	34	0	2
315	77	35	0	1	12	0
318	134	19	1	1	3	1
319	220	17	0	2	7	0
320	12	23	0	2	3	3
320	107	13	0	2	5	10
320	107	13	0	1	5	10
321	89	26	0	2	10	8
321	205	12	0	2	10	11
322	112	33	0	1	11	1
323	4	23	1	2	10	2
323	300	40	1	1	11	2
323	336	40	1	2	3	0
327	7	32	0	1	3	15
327	54	40	0	1	13	4
327	115	30	0	1	1	0
327	124	38	0	1	1	12
330	63	18	0	1	11	1
330	63	37	0	2	11	0
330	151	32	0	1	7	3
330	175	27	0	2	10	3
333	10	15	0	2	10	20
333	32	31	0	2	1	1
336	52	12	0	1	1	2
336	296	17	0	2	2	1
336	296	17	0	2	2	1
337	50	35	1	2	11	0
337	150	19	1	1	1	1
337	178	11	1	2	13	11
338	34	23	0	2	1	3
338	34	23	0	2	1	3
338	247	14	0	1	10	4
338	327	28	0	2	1	3
338	410	32	0	2	7	0
340	142	32	1	2	1	0
340	201	42	1	1	7	0
340	243	5	1
340	394	22	1	1	1	5
340	397	35	1	1	10	3
341	162	9	0	1	3	1
341	244	42	0	1	1	1
341	316	38	0	1	7	6
343	18	34	1	1	1	5
343	22	11	1	1	3	2
343	124	12	1	2	10	13
343	155	35	1	2	11	0
343	256	12	1	1	3	14
343	320	12	1	1	10	14
343	347	18	1	2	5	1
343	380	10	1	1	7	3
343	456	15	1	2	3	1
343	489	25	1	2	3	4
346	89	6	1	1	12	0
346	291	36	1	2
347	78	17	0	1	12	5
348	124	22	0	2	3	3
351	67	34	1	1	7	5
354	74	19	1	2	3	4
354	114	18	1	2	12	1
354	147	18	1	1	7	1
354	149	26	1	1	7	21
355	13	8	0	1	5	1
355	148	11	0	1	7	2
355	279	14	0	2	10	20
355	289	29	0	1	2	3
356	225	34	1	1	5	15
356	243	21	1	2	5	3
356	270	32	1	1	10	3
356	363	18	1	2	5	4
357	64	16	0	2	7	0
358	149	39	1	1	7	3
359	9	33	0	1	13	4
359	12	10	0	1	5	5
359	12	10	0	1	5	0
360	58	35	0
362	19	22	1	2	10	3
362	97	12	1	2	3	2
363	90	34	0	2	13	2
363	199	41	0	2	7	0
364	104	15	1	2	12	1
364	140	5	1	2	11	0
364	183	13	1	2	7	8
366	395	14	1	1	11	1
367	152	25	0	1	3	1
367	278	20	0	1	6	1
368	33	9	0	2	3	1
368	33	9	0	2	3	1
368	180	12	0	1	7	15
368	244	19	0	2	11	1
368	248	29	0	2	11	3
370	120	20	1	2	13	4
370	217	25	1	1	7	0
370	381	16	1	2	10	15
370	395	23	1	1	1	3
370	403	17	1	1	5	5
371	422	42	1	1	1	0
371	428	35	1	1	13	20
371	432	34	1	2	7	2
373	38	15	1	1	10	7
373	58	31	1	2	7	0
374	144	33	0	2	10	3
374	217	13	0	2	12	1
374	228	28	0	2	13	2
374	230	23	0	2	3	1
375	429	32	1	2	2	9
375	429	32	1	1	2	0
375	499	41	1	1	7	10
377	124	28	0	2	10	0
379	126	21	1	2
379	160	5	1	2	10	0
381	29	33	0	2	1	7
383	16	15	1	2	7	3
383	303	29	1	2	10	5
383	320	32	1	2	12	0
387	261	24	0	2	2	3
389	32	42	0	1	7	0
390	18	32	1	1	7	0
390	28	17	1	1	3	11
390	52	37	1
391	111	33	0	1	7	18
391	116	34	0	2	7	1
393	7	16	1	2	7	6
393	243	16	1	1	7	0
393	294	21	1	2	7	1
393	294	36	1	2	11	1
394	18	5	0	2	7	0
398	51	20	1	2	5	1
399	16	16	0	1	3	0
399	19	10	0	1	12	3
399	20	32	0	1	3	8
399	153	15	0	1	10	2
399	160	34	0	2	7	2
400	19	28	1	2	11	20
400	26	41	1	2	10	6
403	54	41	0	1	1	3
403	125	20	0	1	11	1
404	41	5	1	1
405	69	12	0	1	7	1
405	73	36	0	1	7	6
406	5	1	1	1
406	16	24	1	1	3	1
406	221	42	1	2	7	0
408	24	31	1	1	7	0
408	49	32	1	1	7	23
411	106	24	1	1	3	1
411	231	23	1	2	13	15
412	38	15	1	2	2	15
412	45	13	1	2	7	3
413	190	12	1	2	10	1
414	12	32	1	1	1	0
414	17	27	1	1	7	9
417	88	10	1	1	10	4
417	458	5	1	2	10	3
417	519	26	1	1	6	0
419	29	24	1	1	7	0
419	29	38	1	1	7	0
421	24	10	1	1	12	7
421	58	17	1	2	10	2
421	232	22	1	1	3	1
421	232	35	1	2	7	1
421	361	23	1	1	11	1
421	426	37	1	2	11	2
421	429	19	1	1	10	6
421	525	34	1	2	1	6
424	2	37	0	2	10	14
425	17	35	1	2	10	12
428	24	16	0	1	7	11
428	62	15	0	1	7	1
428	63	32	0	1	11	7
434	8	30	1	1
434	13	19	1	2	7	1
435	115	24	0	2	11	15
435	144	29	0	1	7	2
435	162	10	0	1	10	0
435	162	10	0	1	10	0
435	224	40	0	1	6	1
437	63	35	0	2	10	4
439	56	18	0	1	3	2
440	11	28	1	2	10	5
440	97	20	1	2
442	23	27	0	1	3	1
442	192	17	0	1	1	4
446	50	14	1	2	10	2
446	50	14	1	2
446	153	27	1	1	10	17
446	157	33	1	1	7	0
447	112	16	1	1	12	1
447	177	39	1
448	46	35	0	2	7	10
448	131	41	0	1	1	0
448	271	33	0	2	1	3
448	272	18	0	1	11	0
448	273	14	0	1	7	3
448	299	25	0	2	1	5
449	220	35	1	2	3	4
450	8	19	1	1	10	13
450	8	32	1	1	10	13
451	22	16	0	2	10	0
452	86	10	1	2	11	1
453	108	11	1	1	13	4
453	255	12	1	1	7	1
455	55	18	1	1	10	4
456	48	42	0	1	2	0
456	64	23	0	1	10	4
456	64	34	0	1	11	4
459	19	27	0	2	3	1
459	34	35	0	1	7	3
459	290	35	0	1	12	1
461	21	41	0	1	11	3
464	5	26	0	2	10	2
