# Supplementary material for: Community health promotion and medical provision for neonatal health—CHAMPION cluster randomised trial in Nagarkurnool district, Telangana (formerly Andhra Pradesh), India
Source: PLoS Med. 2017 Jul 5;14(7):e1002324. doi: 10.1371/journal.pmed.1002324 (PMC5497957; doi:10.1371/journal.pmed.1002324)
Supplement: S11 Data — (CSV) [file pmed.1002324.s011.csv]

village_id	womens_id	monthlyid	arm	traveltime	villagetype	baselineentry	neonatmort	stripes
1	11	12	0	2	1	1	0	0
1	17	19	0	2	1	1	0	0
1	20	33	0	2	1	1	0	0
1	46	23	0	2	1	1	1	0
1	51	34	0	2	1	1	0	0
1	71	21	0	2	1	1	1	0
1	86	20	0	2	1	1	0	0
1	97	15	0	2	1	1	0	0
1	99	10	0	2	1	1	0	0
1	114	21	0	2	1	1	1	0
1	130	18	0	2	1	1	0	0
1	131	18	0	2	1	1	0	0
1	136	21	0	2	1	1	0	0
1	138	17	0	2	1	1	0	0
1	139	31	0	2	1	1	0	0
1	189	14	0	2	1	0	0	0
1	189	29	0	2	1	0	0	0
1	191	38	0	2	1	0	0	0
1	191	40	0	2	1	0	0	0
1	192	13	0	2	1	0	0	0
1	193	14	0	2	1	0	0	0
1	193	38	0	2	1	0	0	0
1	194	25	0	2	1	0	0	0
1	197	26	0	2	1	0	1	0
1	197	38	0	2	1	0	0	0
1	199	33	0	2	1	0	0	0
1	202	17	0	2	1	0	0	0
1	203	17	0	2	1	0	0	0
1	207	24	0	2	1	0	0	0
1	208	31	0	2	1	0	0	0
1	213	41	0	2	1	0	0	0
1	214	39	0	2	1	0	0	0
2	12	23	0	2	3	1	1	0
2	12	38	0	2	3	1	0	0
2	19	20	0	2	3	1	1	0
2	19	33	0	2	3	1	0	0
2	37	35	0	2	3	1	0	0
2	45	31	0	2	3	0	0	0
2	46	15	0	2	3	0	0	0
2	53	36	0	2	3	0	0	0
2	54	40	0	2	3	0	0	0
3	9	14	0	1	1	1	1	0
3	9	31	0	1	1	1	0	0
3	10	5	0	1	1	1	0	0
3	30	27	0	1	1	1	0	0
3	48	37	0	1	1	1	0	0
3	102	8	0	1	1	1	0	0
3	106	41	0	1	1	1	0	0
3	111	36	0	1	1	1	0	0
3	132	9	0	1	1	1	0	0
3	136	18	0	1	1	1	0	0
3	162	14	0	1	1	1	0	0
3	163	18	0	1	1	1	0	0
3	165	9	0	1	1	0	0	0
3	165	31	0	1	1	0	0	0
3	165	34	0	1	1	0	0	0
3	166	14	0	1	1	0	0	0
3	167	30	0	1	1	0	0	0
3	169	10	0	1	1	0	0	0
3	170	31	0	1	1	0	0	0
3	178	25	0	1	1	0	0	0
3	179	41	0	1	1	0	0	0
3	179	41	0	1	1	0	0	0
3	181	34	0	1	1	0	0	0
3	183	24	0	1	1	0	0	0
3	184	27	0	1	1	0	0	0
3	184	42	0	1	1	0	1	0
3	186	24	0	1	1	0	1	0
3	186	37	0	1	1	0	0	0
3	193	35	0	1	1	0	0	0
3	202	35	0	1	1	0	0	0
3	205	42	0	1	1	0	0	0
4	4	20	1	2	1	1	0	0
4	6	32	1	2	1	1	0	0
4	18	20	1	2	1	1	0	0
4	18	42	1	2	1	1	0	0
4	28	13	1	2	1	1	0	0
4	32	22	1	2	1	1	0	0
4	37	30	1	2	1	1	0	0
4	38	16	1	2	1	1	0	0
4	44	15	1	2	1	1	1	0
4	44	33	1	2	1	1	0	0
4	55	10	1	2	1	1	0	0
4	57	24	1	2	1	1	0	0
4	60	35	1	2	1	1	0	0
4	68	28	1	2	1	1	1	0
4	70	24	1	2	1	1	0	0
4	74	19	1	2	1	1	0	0
4	84	12	1	2	1	1	0	0
4	85	33	1	2	1	1	0	0
4	86	22	1	2	1	1	1	0
4	101	14	1	2	1	0	0	0
4	102	15	1	2	1	0	0	0
4	102	36	1	2	1	0	1	0
4	105	16	1	2	1	0	0	0
4	105	40	1	2	1	0	0	0
4	109	36	1	2	1	0	0	0
4	110	15	1	2	1	0	0	0
4	110	35	1	2	1	0	0	0
4	111	34	1	2	1	0	1	0
4	114	27	1	2	1	0	0	0
4	117	33	1	2	1	0	0	0
4	121	42	1	2	1	0	0	0
5	4	38	0	1	3	1	0	0
5	12	17	0	1	3	1	0	0
5	32	22	0	1	3	1	0	0
5	33	10	0	1	3	0	1	0
5	33	10	0	1	3	0	1	0
5	33	27	0	1	3	0	0	0
5	37	41	0	1	3	0	0	0
6	25	16	1	2	3	0	0	0
6	25	36	1	2	3	0	0	0
6	29	29	1	2	3	0	0	0
6	30	40	1	2	3	0	0	0
7	9	17	0	1	1	1	0	1
7	12	40	0	1	1	1	1	1
7	17	27	0	1	1	1	0	1
7	26	19	0	1	1	1	0	1
7	27	19	0	1	1	1	0	1
7	53	10	0	1	1	1	0	1
7	75	25	0	1	1	1	0	1
7	76	35	0	1	1	1	0	1
7	84	26	0	1	1	1	0	1
7	100	11	0	1	1	1	0	1
7	118	32	0	1	1	1	0	1
7	161	11	0	1	1	1	0	1
7	173	11	0	1	1	1	0	1
7	186	27	0	1	1	0	0	1
7	186	36	0	1	1	0	0	1
7	187	9	0	1	1	0	0	1
7	187	38	0	1	1	0	0	1
7	189	26	0	1	1	0	0	1
7	190	13	0	1	1	0	0	1
7	190	38	0	1	1	0	0	1
7	192	19	0	1	1	0	0	1
7	197	37	0	1	1	0	0	1
7	198	34	0	1	1	0	0	1
7	199	33	0	1	1	0	1	1
8	42	22	0	1	1	1	0	1
8	89	11	0	1	1	1	0	1
8	198	9	0	1	1	1	0	1
8	312	17	0	1	1	1	0	1
8	314	18	0	1	1	1	0	1
8	316	30	0	1	1	1	0	1
8	343	41	0	1	1	1	0	1
8	346	21	0	1	1	1	0	1
8	356	29	0	1	1	1	0	1
8	367	31	0	1	1	1	0	1
8	375	12	0	1	1	1	0	1
8	375	36	0	1	1	1	0	1
8	376	32	0	1	1	1	0	1
8	383	40	0	1	1	1	0	1
8	384	17	0	1	1	1	0	1
8	398	15	0	1	1	1	0	1
8	404	31	0	1	1	1	0	1
8	406	12	0	1	1	1	0	1
8	407	22	0	1	1	1	0	1
8	413	31	0	1	1	1	0	1
8	420	14	0	1	1	1	1	1
8	423	37	0	1	1	1	0	1
8	437	21	0	1	1	1	0	1
8	439	23	0	1	1	1	0	1
8	455	20	0	1	1	1	0	1
8	463	9	0	1	1	1	0	1
8	481	32	0	1	1	1	0	1
8	486	33	0	1	1	1	0	1
8	490	25	0	1	1	1	1	1
8	490	39	0	1	1	1	0	1
8	495	29	0	1	1	1	0	1
8	509	34	0	1	1	1	0	1
8	513	17	0	1	1	0	0	1
8	515	34	0	1	1	0	0	1
8	517	21	0	1	1	0	0	1
8	521	21	0	1	1	0	0	1
8	522	19	0	1	1	0	0	1
8	527	10	0	1	1	0	0	1
8	528	35	0	1	1	0	0	1
8	529	27	0	1	1	0	0	1
8	530	16	0	1	1	0	0	1
8	531	27	0	1	1	0	0	1
8	532	13	0	1	1	0	0	1
8	533	11	0	1	1	0	1	1
8	533	23	0	1	1	0	0	1
8	537	16	0	1	1	0	0	1
8	537	41	0	1	1	0	0	1
8	541	24	0	1	1	0	0	1
8	543	32	0	1	1	0	0	1
8	544	35	0	1	1	0	0	1
8	545	36	0	1	1	0	0	1
8	566	39	0	1	1	0	0	1
9	9	26	1	1	1	1	0	0
9	11	16	1	1	1	1	0	0
9	26	14	1	1	1	1	0	0
9	28	13	1	1	1	1	0	0
9	35	42	1	1	1	1	0	0
9	38	18	1	1	1	1	1	0
9	38	30	1	1	1	1	0	0
9	61	36	1	1	1	1	0	0
9	70	30	1	1	1	1	0	0
9	76	21	1	1	1	1	0	0
9	101	32	1	1	1	1	0	0
9	122	42	1	1	1	1	0	0
9	126	31	1	1	1	1	0	0
9	131	27	1	1	1	1	1	0
9	131	38	1	1	1	1	0	0
9	133	27	1	1	1	0	0	0
9	137	22	1	1	1	0	0	0
9	138	30	1	1	1	0	0	0
9	141	21	1	1	1	0	0	0
9	149	25	1	1	1	0	0	0
9	150	26	1	1	1	0	0	0
9	153	32	1	1	1	0	0	0
9	158	24	1	1	1	0	0	0
9	165	33	1	1	1	0	0	0
9	167	34	1	1	1	0	0	0
9	169	42	1	1	1	0	0	0
10	12	11	1	1	3	1	0	1
10	12	33	1	1	3	1	1	1
10	12	33	1	1	3	1	1	1
10	13	38	1	1	3	1	0	1
10	14	36	1	1	3	1	0	1
10	34	15	1	1	3	1	0	1
10	35	34	1	1	3	1	0	1
10	37	15	1	1	3	1	0	1
10	38	22	1	1	3	1	0	1
10	40	23	1	1	3	1	1	1
10	40	39	1	1	3	1	0	1
10	43	24	1	1	3	1	0	1
10	47	18	1	1	3	1	0	1
10	49	37	1	1	3	1	0	1
10	55	10	1	1	3	1	0	1
10	55	33	1	1	3	1	0	1
10	57	41	1	1	3	1	0	1
10	59	34	1	1	3	1	0	1
10	73	11	1	1	3	1	0	1
10	73	24	1	1	3	1	0	1
10	75	11	1	1	3	1	0	1
10	78	25	1	1	3	1	0	1
10	80	16	1	1	3	1	0	1
10	83	42	1	1	3	1	0	1
10	87	17	1	1	3	1	0	1
10	90	23	1	1	3	1	0	1
10	94	12	1	1	3	1	0	1
10	101	16	1	1	3	0	0	1
10	103	14	1	1	3	0	0	1
10	103	29	1	1	3	0	0	1
10	105	38	1	1	3	0	0	1
10	106	19	1	1	3	0	0	1
10	109	23	1	1	3	0	0	1
10	110	42	1	1	3	0	0	1
10	111	39	1	1	3	0	0	1
10	113	35	1	1	3	0	0	1
11	3	22	0	1	1	1	0	1
11	10	12	0	1	1	1	0	1
11	29	31	0	1	1	1	0	1
11	32	17	0	1	1	1	0	1
11	39	32	0	1	1	1	0	1
11	41	12	0	1	1	1	0	1
11	45	24	0	1	1	1	0	1
11	48	36	0	1	1	1	0	1
11	60	21	0	1	1	1	0	1
11	61	34	0	1	1	1	0	1
11	63	20	0	1	1	1	0	1
11	83	19	0	1	1	1	0	1
11	85	27	0	1	1	1	0	1
11	101	42	0	1	1	1	0	1
11	106	18	0	1	1	1	0	1
11	111	42	0	1	1	1	0	1
11	121	16	0	1	1	0	0	1
11	121	33	0	1	1	0	0	1
11	122	12	0	1	1	0	1	1
11	125	15	0	1	1	0	0	1
11	125	40	0	1	1	0	0	1
11	126	22	0	1	1	0	0	1
11	127	11	0	1	1	0	0	1
11	128	11	0	1	1	0	0	1
11	128	32	0	1	1	0	0	1
11	129	17	0	1	1	0	0	1
11	134	31	0	1	1	0	0	1
11	147	40	0	1	1	0	0	1
11	158	40	0	1	1	0	0	1
12	19	19	1	1	3	1	0	1
12	20	25	1	1	3	1	0	1
12	25	35	1	1	3	1	0	1
12	28	32	1	1	3	1	0	1
12	33	18	1	1	3	1	1	1
12	36	32	1	1	3	1	1	1
12	47	27	1	1	3	1	0	1
12	79	33	1	1	3	1	0	1
12	90	33	1	1	3	1	0	1
12	102	18	1	1	3	0	0	1
12	105	27	1	1	3	0	0	1
12	110	23	1	1	3	0	0	1
12	113	34	1	1	3	0	0	1
12	115	26	1	1	3	0	0	1
12	116	31	1	1	3	0	0	1
12	118	26	1	1	3	0	0	1
12	121	27	1	1	3	0	0	1
12	121	35	1	1	3	0	0	1
13	8	10	1	1	3	1	0	0
13	8	34	1	1	3	1	0	0
13	11	34	1	1	3	1	0	0
13	14	42	1	1	3	1	1	0
13	19	21	1	1	3	1	0	0
13	25	17	1	1	3	1	0	0
13	38	34	1	1	3	1	0	0
13	41	33	1	1	3	1	0	0
13	42	16	1	1	3	1	0	0
13	42	40	1	1	3	1	0	0
13	48	23	1	1	3	1	0	0
13	49	42	1	1	3	1	0	0
13	52	29	1	1	3	1	0	0
13	53	25	1	1	3	1	0	0
13	59	17	1	1	3	1	1	0
13	97	18	1	1	3	0	0	0
13	103	25	1	1	3	0	0	0
13	104	28	1	1	3	0	0	0
14	20	12	1	1	1	1	0	1
14	20	35	1	1	1	1	0	1
14	29	21	1	1	1	1	0	1
14	32	28	1	1	1	1	0	1
14	34	28	1	1	1	1	0	1
14	52	12	1	1	1	1	0	1
14	69	34	1	1	1	1	0	1
14	72	36	1	1	1	1	0	1
14	78	18	1	1	1	1	0	1
14	89	14	1	1	1	1	0	1
14	89	39	1	1	1	1	1	1
14	98	27	1	1	1	1	0	1
14	99	30	1	1	1	1	0	1
14	108	19	1	1	1	1	0	1
14	109	20	1	1	1	1	0	1
14	111	12	1	1	1	1	0	1
14	122	33	1	1	1	1	0	1
14	141	31	1	1	1	0	0	1
14	146	40	1	1	1	0	0	1
14	147	29	1	1	1	0	0	1
14	150	41	1	1	1	0	0	1
14	153	38	1	1	1	0	0	1
14	157	40	1	1	1	0	0	1
15	4	40	1	2	3	1	0	0
15	6	39	1	2	3	1	0	0
15	10	31	1	2	3	1	0	0
15	12	15	1	2	3	1	0	0
15	23	17	1	2	3	1	0	0
15	29	34	1	2	3	1	0	0
15	31	11	1	2	3	1	0	0
15	45	17	1	2	3	0	0	0
15	46	16	1	2	3	0	0	0
15	49	18	1	2	3	0	0	0
16	3	23	0	1	1	1	0	1
16	5	42	0	1	1	1	0	1
16	7	41	0	1	1	1	0	1
16	14	41	0	1	1	1	0	1
16	22	21	0	1	1	1	0	1
16	23	34	0	1	1	1	0	1
16	30	23	0	1	1	1	0	1
16	37	30	0	1	1	1	0	1
16	55	29	0	1	1	1	0	1
16	68	18	0	1	1	1	0	1
16	84	31	0	1	1	1	0	1
16	103	11	0	1	1	1	0	1
16	106	12	0	1	1	1	0	1
16	113	25	0	1	1	0	0	1
16	115	21	0	1	1	0	0	1
16	117	42	0	1	1	0	1	1
16	118	20	0	1	1	0	0	1
16	121	31	0	1	1	0	0	1
16	126	41	0	1	1	0	0	1
17	7	19	0	1	3	1	0	0
17	11	18	0	1	3	1	0	0
17	16	29	0	1	3	1	0	0
17	17	8	0	1	3	1	1	0
17	17	24	0	1	3	1	0	0
17	20	33	0	1	3	1	0	0
17	28	33	0	1	3	1	0	0
17	31	21	0	1	3	1	0	0
17	34	33	0	1	3	1	0	0
17	35	18	0	1	3	1	0	0
17	37	38	0	1	3	1	0	0
17	43	20	0	1	3	1	0	0
17	50	21	0	1	3	1	0	0
17	53	13	0	1	3	0	0	0
17	57	35	0	1	3	0	0	0
17	61	23	0	1	3	0	0	0
17	61	38	0	1	3	0	0	0
17	63	41	0	1	3	0	0	0
17	73	40	0	1	3	0	0	0
18	4	16	0	2	3	1	0	0
18	5	12	0	2	3	1	0	0
18	5	37	0	2	3	1	0	0
18	7	28	0	2	3	1	1	0
18	12	17	0	2	3	1	1	0
18	12	33	0	2	3	1	0	0
18	19	19	0	2	3	1	0	0
18	19	19	0	2	3	1	1	0
18	46	19	0	2	3	1	0	0
18	47	28	0	2	3	1	1	0
18	49	9	0	2	3	1	0	0
18	59	32	0	2	3	0	0	0
18	60	30	0	2	3	0	0	0
18	61	38	0	2	3	0	0	0
18	65	32	0	2	3	0	0	0
19	3	18	1	1	3	1	0	0
19	5	12	1	1	3	1	0	0
19	8	41	1	1	3	1	0	0
19	9	17	1	1	3	1	0	0
19	18	30	1	1	3	1	0	0
19	18	30	1	1	3	1	0	0
19	21	26	1	1	3	1	0	0
19	28	39	1	1	3	1	0	0
19	41	41	1	1	3	0	0	0
19	42	12	1	1	3	0	0	0
19	42	26	1	1	3	0	0	0
19	45	10	1	1	3	0	0	0
19	45	37	1	1	3	0	0	0
19	49	29	1	1	3	0	0	0
19	53	41	1	1	3	0	0	0
20	4	17	1	2	3	1	0	0
20	8	24	1	2	3	1	0	0
20	17	34	1	2	3	0	0	0
21	1	29	0	2	3	1	1	0
21	8	12	0	2	3	1	0	0
21	9	38	0	2	3	1	1	0
21	15	30	0	2	3	1	1	0
21	36	24	0	2	3	1	0	0
21	43	20	0	2	3	1	0	0
21	47	38	0	2	3	1	0	0
21	51	16	0	2	3	1	0	0
21	52	12	0	2	3	1	0	0
21	54	18	0	2	3	1	0	0
21	63	29	0	2	3	1	0	0
21	71	15	0	2	3	1	0	0
21	82	19	0	2	3	1	0	0
21	83	24	0	2	3	1	0	0
21	94	15	0	2	3	1	0	0
21	99	12	0	2	3	1	0	0
21	105	18	0	2	3	1	0	0
21	113	31	0	2	3	0	1	0
21	114	36	0	2	3	0	0	0
21	117	18	0	2	3	0	0	0
21	121	28	0	2	3	0	0	0
22	3	12	0	1	3	1	0	0
22	3	40	0	1	3	1	0	0
22	7	21	0	1	3	1	0	0
22	7	39	0	1	3	1	0	0
22	11	26	0	1	3	1	0	0
22	13	5	0	1	3	1	0	0
22	13	41	0	1	3	1	0	0
22	17	25	0	1	3	1	0	0
22	27	31	0	1	3	1	0	0
22	35	33	0	1	3	1	0	0
22	49	41	0	1	3	0	0	0
22	50	42	0	1	3	0	0	0
23	3	10	0	1	3	1	1	1
23	3	15	0	1	3	1	0	1
23	3	35	0	1	3	1	0	1
23	15	16	0	1	3	1	0	1
23	22	21	0	1	3	1	0	1
23	27	15	0	1	3	1	0	1
23	29	40	0	1	3	1	0	1
23	38	18	0	1	3	1	0	1
23	52	23	0	1	3	1	0	1
23	57	35	0	1	3	1	0	1
23	83	27	0	1	3	1	0	1
23	91	15	0	1	3	0	0	1
23	93	21	0	1	3	0	0	1
23	94	18	0	1	3	0	0	1
23	98	18	0	1	3	0	0	1
23	105	35	0	1	3	0	0	1
23	107	25	0	1	3	0	0	1
24	4	12	0	2	1	1	0	0
24	18	23	0	2	1	1	0	0
24	29	15	0	2	1	1	0	0
24	42	42	0	2	1	1	0	0
24	51	42	0	2	1	1	0	0
24	53	24	0	2	1	1	0	0
24	62	26	0	2	1	1	0	0
24	63	40	0	2	1	1	0	0
24	64	18	0	2	1	1	0	0
24	66	30	0	2	1	1	0	0
24	68	12	0	2	1	1	0	0
24	78	20	0	2	1	1	0	0
24	88	38	0	2	1	1	0	0
24	123	13	0	2	1	1	0	0
24	130	20	0	2	1	1	0	0
24	133	10	0	2	1	1	0	0
24	140	21	0	2	1	1	0	0
24	157	13	0	2	1	1	0	0
24	157	42	0	2	1	1	0	0
24	160	21	0	2	1	1	0	0
24	161	42	0	2	1	1	0	0
24	172	20	0	2	1	1	0	0
24	174	17	0	2	1	0	0	0
24	175	19	0	2	1	0	0	0
24	176	26	0	2	1	0	0	0
24	182	20	0	2	1	0	0	0
24	185	34	0	2	1	0	0	0
24	193	35	0	2	1	0	0	0
25	6	19	1	2	3	1	0	0
25	7	16	1	2	3	1	0	0
25	26	16	1	2	3	1	0	0
25	26	22	1	2	3	1	0	0
25	37	12	1	2	3	1	1	0
25	39	16	1	2	3	1	0	0
25	39	39	1	2	3	1	1	0
25	41	18	1	2	3	1	1	0
25	41	33	1	2	3	1	1	0
25	70	24	1	2	3	1	0	0
25	81	24	1	2	3	0	0	0
25	86	36	1	2	3	0	0	0
26	1	18	0	1	1	1	0	0
26	26	18	0	1	1	1	1	0
26	26	41	0	1	1	1	0	0
26	30	14	0	1	1	1	0	0
26	32	14	0	1	1	1	1	0
26	32	28	0	1	1	1	0	0
26	48	14	0	1	1	1	0	0
26	57	35	0	1	1	1	0	0
26	60	11	0	1	1	1	0	0
26	72	11	0	1	1	1	1	0
26	72	22	0	1	1	1	0	0
26	99	22	0	1	1	1	1	0
26	103	10	0	1	1	1	1	0
26	103	42	0	1	1	1	0	0
26	117	19	0	1	1	0	0	0
26	117	39	0	1	1	0	0	0
26	118	28	0	1	1	0	1	0
26	118	42	0	1	1	0	0	0
26	120	26	0	1	1	0	0	0
26	521	32	0	1	1	0	0	0
26	522	14	0	1	1	0	0	0
26	522	39	0	1	1	0	0	0
26	523	22	0	1	1	0	0	0
26	524	11	0	1	1	0	1	0
26	524	34	0	1	1	0	0	0
26	527	41	0	1	1	0	0	0
26	528	25	0	1	1	0	1	0
26	528	41	0	1	1	0	0	0
26	529	26	0	1	1	0	0	0
26	537	38	0	1	1	0	0	0
26	541	39	0	1	1	0	0	0
26	542	40	0	1	1	0	0	0
27	25	13	1	1	1	1	0	1
27	25	34	1	1	1	1	0	1
27	33	17	1	1	1	1	0	1
27	38	36	1	1	1	1	0	1
27	123	13	1	1	1	1	0	1
27	137	42	1	1	1	1	0	1
27	140	18	1	1	1	1	0	1
27	150	26	1	1	1	1	0	1
27	153	16	1	1	1	1	0	1
27	182	13	1	1	1	1	0	1
27	186	11	1	1	1	1	0	1
27	198	12	1	1	1	1	0	1
27	200	14	1	1	1	1	0	1
27	204	16	1	1	1	1	0	1
27	205	17	1	1	1	1	0	1
27	208	16	1	1	1	1	0	1
27	213	12	1	1	1	0	0	1
27	221	22	1	1	1	0	0	1
27	225	21	1	1	1	0	0	1
27	229	34	1	1	1	0	0	1
27	230	34	1	1	1	0	0	1
27	231	33	1	1	1	0	0	1
27	233	19	1	1	1	0	0	1
27	238	40	1	1	1	0	0	1
27	241	27	1	1	1	0	0	1
27	242	27	1	1	1	0	0	1
27	243	27	1	1	1	0	0	1
27	246	31	1	1	1	0	0	1
27	247	31	1	1	1	0	0	1
28	8	12	1	1	3	1	0	0
28	16	30	1	1	3	1	0	0
28	22	23	1	1	3	1	1	0
28	23	24	1	1	3	1	0	0
28	25	18	1	1	3	1	0	0
28	27	16	1	1	3	1	0	0
28	34	35	1	1	3	1	0	0
28	38	23	1	1	3	1	0	0
28	46	23	1	1	3	1	0	0
28	51	14	1	1	3	1	0	0
28	54	20	1	1	3	1	0	0
28	57	18	1	1	3	1	0	0
28	61	13	1	1	3	0	0	0
28	61	37	1	1	3	0	0	0
28	62	19	1	1	3	0	0	0
28	62	41	1	1	3	0	0	0
28	64	24	1	1	3	0	0	0
28	65	25	1	1	3	0	0	0
28	73	34	1	1	3	0	0	0
28	75	24	1	1	3	0	0	0
28	77	28	1	1	3	0	0	0
28	81	24	1	1	3	0	1	0
28	85	41	1	1	3	0	0	0
28	91	42	1	1	3	0	0	0
29	1	28	1	1	1	1	0	1
29	9	13	1	1	1	1	0	1
29	21	39	1	1	1	1	0	1
29	22	28	1	1	1	1	0	1
29	24	36	1	1	1	1	0	1
29	25	35	1	1	1	1	0	1
29	34	34	1	1	1	1	0	1
29	35	21	1	1	1	1	0	1
29	37	31	1	1	1	1	0	1
29	42	20	1	1	1	1	0	1
29	44	30	1	1	1	1	0	1
29	45	24	1	1	1	1	0	1
29	58	17	1	1	1	1	0	1
29	93	27	1	1	1	1	0	1
29	100	10	1	1	1	1	0	1
29	109	26	1	1	1	1	0	1
29	123	14	1	1	1	1	0	1
29	140	31	1	1	1	1	0	1
29	141	20	1	1	1	1	0	1
29	145	24	1	1	1	1	0	1
29	151	12	1	1	1	1	0	1
29	156	11	1	1	1	1	0	1
29	156	31	1	1	1	1	0	1
29	160	39	1	1	1	1	0	1
29	162	14	1	1	1	1	0	1
29	175	23	1	1	1	1	0	1
29	203	34	1	1	1	1	1	1
29	206	21	1	1	1	1	0	1
29	210	14	1	1	1	0	0	1
29	210	37	1	1	1	0	0	1
29	213	17	1	1	1	0	0	1
29	214	36	1	1	1	0	0	1
29	217	31	1	1	1	0	0	1
29	218	30	1	1	1	0	0	1
29	221	28	1	1	1	0	0	1
29	225	21	1	1	1	0	0	1
29	229	29	1	1	1	0	0	1
29	233	23	1	1	1	0	0	1
29	242	31	1	1	1	0	0	1
29	245	37	1	1	1	0	1	1
29	246	25	1	1	1	0	0	1
29	247	31	1	1	1	0	0	1
29	248	25	1	1	1	0	0	1
29	249	25	1	1	1	0	0	1
29	250	36	1	1	1	0	0	1
29	254	39	1	1	1	0	1	1
30	5	21	1	2	3	1	0	0
30	11	23	1	2	3	1	1	0
30	14	42	1	2	3	1	0	0
30	18	16	1	2	3	1	0	0
30	29	41	1	2	3	1	0	0
30	30	27	1	2	3	1	0	0
30	32	20	1	2	3	1	0	0
30	33	13	1	2	3	1	0	0
30	47	16	1	2	3	1	0	0
30	51	42	1	2	3	1	1	0
30	57	27	1	2	3	1	0	0
30	63	22	1	2	3	1	0	0
30	65	23	1	2	3	1	0	0
30	70	35	1	2	3	1	0	0
30	92	9	1	2	3	1	0	0
30	92	36	1	2	3	1	0	0
30	100	10	1	2	3	1	0	0
30	100	31	1	2	3	1	0	0
30	101	32	1	2	3	1	0	0
30	114	15	1	2	3	0	0	0
30	117	19	1	2	3	0	0	0
30	121	24	1	2	3	0	0	0
30	123	27	1	2	3	0	0	0
30	125	28	1	2	3	0	0	0
31	6	32	1	1	3	1	0	0
31	10	22	1	1	3	1	0	0
31	14	40	1	1	3	1	0	0
31	19	20	1	1	3	1	0	0
31	37	15	1	1	3	1	0	0
31	42	38	1	1	3	1	0	0
31	44	42	1	1	3	1	0	0
31	46	31	1	1	3	1	0	0
31	49	20	1	1	3	1	0	0
31	50	14	1	1	3	1	0	0
31	50	37	1	1	3	1	0	0
31	51	23	1	1	3	1	0	0
31	56	34	1	1	3	1	0	0
31	61	37	1	1	3	1	0	0
31	73	39	1	1	3	0	0	0
31	74	42	1	1	3	0	0	0
31	77	36	1	1	3	0	0	0
31	81	32	1	1	3	0	1	0
31	85	36	1	1	3	0	0	0
31	89	41	1	1	3	0	0	0
31	90	42	1	1	3	0	0	0
31	91	40	1	1	3	0	0	0
32	15	29	1	2	3	1	0	0
32	16	19	1	2	3	1	0	0
32	18	18	1	2	3	1	0	0
32	19	17	1	2	3	1	0	0
32	31	41	1	2	3	1	0	0
32	33	21	1	2	3	1	0	0
32	54	13	1	2	3	0	0	0
32	69	40	1	2	3	0	0	0
32	70	40	1	2	3	0	0	0
33	9	27	1	1	3	1	0	0
33	13	22	1	1	3	1	0	0
33	21	28	1	1	3	1	0	0
33	27	10	1	1	3	1	0	0
33	31	20	1	1	3	1	0	0
33	33	30	1	1	3	1	0	0
33	34	14	1	1	3	1	0	0
33	37	18	1	1	3	1	0	0
33	39	35	1	1	3	1	0	0
33	42	31	1	1	3	1	0	0
33	44	14	1	1	3	1	0	0
33	47	35	1	1	3	1	0	0
33	57	12	1	1	3	0	0	0
33	57	29	1	1	3	0	0	0
33	61	31	1	1	3	0	0	0
33	62	28	1	1	3	0	0	0
34	6	8	0	1	3	1	0	1
34	9	20	0	1	3	1	0	1
34	10	30	0	1	3	1	0	1
34	12	13	0	1	3	1	1	1
34	32	28	0	1	3	1	1	1
34	36	13	0	1	3	1	0	1
34	42	21	0	1	3	1	0	1
34	43	5	0	1	3	1	0	1
34	54	13	0	1	3	1	0	1
34	58	15	0	1	3	1	0	1
34	64	11	0	1	3	1	0	1
34	68	14	0	1	3	1	0	1
34	68	36	0	1	3	1	1	1
34	71	13	0	1	3	1	0	1
34	75	12	0	1	3	1	0	1
34	77	16	0	1	3	1	0	1
34	78	20	0	1	3	1	0	1
34	79	22	0	1	3	1	0	1
34	83	13	0	1	3	1	0	1
34	87	12	0	1	3	1	0	1
34	88	41	0	1	3	1	1	1
34	92	34	0	1	3	1	0	1
34	105	23	0	1	3	0	0	1
34	106	24	0	1	3	0	0	1
34	107	16	0	1	3	0	1	1
34	109	19	0	1	3	0	0	1
34	113	28	0	1	3	0	0	1
34	117	28	0	1	3	0	0	1
34	118	31	0	1	3	0	0	1
34	119	30	0	1	3	0	1	1
34	122	38	0	1	3	0	0	1
35	1	33	0	1	1	1	0	1
35	4	24	0	1	1	1	0	1
35	8	27	0	1	1	1	0	1
35	10	15	0	1	1	1	0	1
35	43	19	0	1	1	1	0	1
35	44	31	0	1	1	1	0	1
35	51	38	0	1	1	1	0	1
35	73	10	0	1	1	1	0	1
35	73	37	0	1	1	1	0	1
35	74	28	0	1	1	1	0	1
35	74	28	0	1	1	1	0	1
35	76	34	0	1	1	1	0	1
35	82	24	0	1	1	1	0	1
35	110	27	0	1	1	1	0	1
35	121	21	0	1	1	1	0	1
35	125	10	0	1	1	1	0	1
35	153	4	0	1	1	1	0	1
35	153	29	0	1	1	1	0	1
35	168	25	0	1	1	1	0	1
35	201	40	0	1	1	1	0	1
35	202	21	0	1	1	1	0	1
35	205	33	0	1	1	1	0	1
35	226	20	0	1	1	1	0	1
35	233	38	0	1	1	1	0	1
35	237	13	0	1	1	0	0	1
35	237	25	0	1	1	0	0	1
35	239	15	0	1	1	0	0	1
35	240	34	0	1	1	0	0	1
35	241	30	0	1	1	0	1	1
35	242	30	0	1	1	0	0	1
35	243	42	0	1	1	0	0	1
35	245	18	0	1	1	0	0	1
35	247	26	0	1	1	0	0	1
35	248	30	0	1	1	0	0	1
35	249	33	0	1	1	0	0	1
35	253	16	0	1	1	0	0	1
35	254	22	0	1	1	0	0	1
35	256	16	0	1	1	0	0	1
35	258	33	0	1	1	0	1	1
35	259	31	0	1	1	0	0	1
35	261	42	0	1	1	0	0	1
35	264	29	0	1	1	0	1	1
35	267	40	0	1	1	0	0	1
35	271	42	0	1	1	0	0	1
36	21	21	0	2	1	0	0	0
36	22	30	0	2	1	0	1	0
37	6	17	1	1	1	1	0	1
37	14	29	1	1	1	1	0	1
37	19	20	1	1	1	1	0	1
37	22	41	1	1	1	1	0	1
37	47	13	1	1	1	1	0	1
37	58	19	1	1	1	1	0	1
37	70	31	1	1	1	1	0	1
37	86	22	1	1	1	1	0	1
37	89	25	1	1	1	1	0	1
37	89	40	1	1	1	1	0	1
37	109	11	1	1	1	1	0	1
37	122	21	1	1	1	1	0	1
37	144	35	1	1	1	1	0	1
37	146	13	1	1	1	1	0	1
37	146	31	1	1	1	1	1	1
37	147	11	1	1	1	1	0	1
37	151	14	1	1	1	1	0	1
37	168	41	1	1	1	1	0	1
37	170	29	1	1	1	1	0	1
37	171	41	1	1	1	1	0	1
37	185	26	1	1	1	1	0	1
37	213	26	1	1	1	1	0	1
37	220	35	1	1	1	1	0	1
37	236	32	1	1	1	1	0	1
37	240	11	1	1	1	1	0	1
37	240	32	1	1	1	1	0	1
37	241	24	1	1	1	1	0	1
37	243	15	1	1	1	1	1	1
37	243	30	1	1	1	1	0	1
37	248	15	1	1	1	1	0	1
37	249	20	1	1	1	1	0	1
37	253	33	1	1	1	0	0	1
37	254	23	1	1	1	0	0	1
37	255	34	1	1	1	0	0	1
37	257	18	1	1	1	0	0	1
37	258	18	1	1	1	0	0	1
37	258	42	1	1	1	0	0	1
37	261	37	1	1	1	0	0	1
37	263	35	1	1	1	0	0	1
37	264	20	1	1	1	0	0	1
37	264	42	1	1	1	0	0	1
37	269	18	1	1	1	0	0	1
37	275	19	1	1	1	0	1	1
37	275	32	1	1	1	0	0	1
37	277	29	1	1	1	0	0	1
37	282	29	1	1	1	0	0	1
37	289	28	1	1	1	0	0	1
37	290	38	1	1	1	0	0	1
37	293	25	1	1	1	0	0	1
37	297	28	1	1	1	0	0	1
37	301	33	1	1	1	0	0	1
37	314	36	1	1	1	0	0	1
37	317	35	1	1	1	0	1	1
38	17	17	0	1	3	1	0	0
38	31	18	0	1	3	1	0	0
38	31	41	0	1	3	1	1	0
38	34	37	0	1	3	1	1	0
38	45	20	0	1	3	0	0	0
38	45	38	0	1	3	0	1	0
38	46	38	0	1	3	0	0	0
38	49	33	0	1	3	0	0	0
38	53	36	0	1	3	0	0	0
39	2	14	1	2	1	1	1	1
39	2	35	1	2	1	1	0	1
39	6	29	1	2	1	1	0	1
39	7	24	1	2	1	1	0	1
39	17	24	1	2	1	1	0	1
39	23	11	1	2	1	1	0	1
39	28	22	1	2	1	1	0	1
39	32	18	1	2	1	1	0	1
39	37	30	1	2	1	1	0	1
39	38	18	1	2	1	1	0	1
39	39	29	1	2	1	1	0	1
39	42	21	1	2	1	1	0	1
39	43	17	1	2	1	1	0	1
39	56	10	1	2	1	1	0	1
39	65	14	1	2	1	1	0	1
39	72	35	1	2	1	1	0	1
39	91	30	1	2	1	1	0	1
39	98	36	1	2	1	1	0	1
39	106	28	1	2	1	1	0	1
39	115	10	1	2	1	1	0	1
39	115	30	1	2	1	1	0	1
39	135	31	1	2	1	1	0	1
39	147	29	1	2	1	1	0	1
39	153	16	1	2	1	1	0	1
39	153	41	1	2	1	1	0	1
39	156	22	1	2	1	1	0	1
39	159	42	1	2	1	1	0	1
39	174	12	1	2	1	1	0	1
39	174	34	1	2	1	1	0	1
39	175	36	1	2	1	1	0	1
39	176	19	1	2	1	1	0	1
39	186	32	1	2	1	1	0	1
39	197	39	1	2	1	0	0	1
39	199	29	1	2	1	0	0	1
39	200	24	1	2	1	0	0	1
39	203	23	1	2	1	0	0	1
39	205	21	1	2	1	0	0	1
39	205	40	1	2	1	0	0	1
39	207	39	1	2	1	0	0	1
39	208	19	1	2	1	0	0	1
39	209	20	1	2	1	0	0	1
39	209	40	1	2	1	0	0	1
39	210	21	1	2	1	0	0	1
39	213	27	1	2	1	0	0	1
39	214	34	1	2	1	0	0	1
39	216	22	1	2	1	0	0	1
39	216	40	1	2	1	0	0	1
39	217	40	1	2	1	0	0	1
39	221	29	1	2	1	0	0	1
39	225	38	1	2	1	0	0	1
39	229	35	1	2	1	0	0	1
39	235	40	1	2	1	0	0	1
39	238	40	1	2	1	0	0	1
40	8	17	0	2	3	1	0	0
40	12	16	0	2	3	1	0	0
40	12	30	0	2	3	1	0	0
40	14	30	0	2	3	1	0	0
40	15	16	0	2	3	1	0	0
40	21	18	0	2	3	1	0	0
40	21	38	0	2	3	1	0	0
40	23	15	0	2	3	1	0	0
40	23	36	0	2	3	1	0	0
40	44	39	0	2	3	1	0	0
40	53	17	0	2	3	1	0	0
40	60	2	0	2	3	1	1	0
40	60	2	0	2	3	1	1	0
40	77	35	0	2	3	1	0	0
40	78	38	0	2	3	1	0	0
40	87	24	0	2	3	1	1	0
40	88	30	0	2	3	1	0	0
40	89	11	0	2	3	0	0	0
40	90	15	0	2	3	0	0	0
40	90	33	0	2	3	0	0	0
40	91	15	0	2	3	0	0	0
40	94	34	0	2	3	0	0	0
40	97	31	0	2	3	0	0	0
40	106	42	0	2	3	0	0	0
41	2	35	1	1	3	1	0	0
41	11	11	1	1	3	1	0	0
41	13	23	1	1	3	1	0	0
41	15	20	1	1	3	1	0	0
41	33	24	1	1	3	1	0	0
41	36	10	1	1	3	1	0	0
41	36	30	1	1	3	1	0	0
41	40	29	1	1	3	1	0	0
41	41	36	1	1	3	1	0	0
41	44	35	1	1	3	1	0	0
41	49	12	1	1	3	1	0	0
41	53	35	1	1	3	0	0	0
41	61	23	1	1	3	0	0	0
41	62	34	1	1	3	0	0	0
41	65	27	1	1	3	0	0	0
41	72	39	1	1	3	0	0	0
42	41	25	0	2	3	0	0	0
42	42	20	0	2	3	0	0	0
42	45	33	0	2	3	0	0	0
43	8	38	0	1	1	1	0	1
43	9	10	0	1	1	1	0	1
43	14	19	0	1	1	1	0	1
43	15	15	0	1	1	1	0	1
43	34	27	0	1	1	1	0	1
43	35	36	0	1	1	1	0	1
43	38	27	0	1	1	1	0	1
43	45	14	0	1	1	1	0	1
43	46	12	0	1	1	1	0	1
43	61	16	0	1	1	1	0	1
43	63	30	0	1	1	1	0	1
43	68	21	0	1	1	1	0	1
43	69	12	0	1	1	1	0	1
43	73	16	0	1	1	1	0	1
43	88	39	0	1	1	1	0	1
43	92	12	0	1	1	1	0	1
43	94	25	0	1	1	1	1	1
43	102	25	0	1	1	1	0	1
43	108	27	0	1	1	1	0	1
43	109	11	0	1	1	1	0	1
43	112	31	0	1	1	1	0	1
43	113	22	0	1	1	1	1	1
43	113	39	0	1	1	1	0	1
43	123	29	0	1	1	1	0	1
43	139	33	0	1	1	1	0	1
43	145	20	0	1	1	1	0	1
43	151	39	0	1	1	1	0	1
43	155	17	0	1	1	1	0	1
43	164	10	0	1	1	1	0	1
43	166	12	0	1	1	1	0	1
43	170	16	0	1	1	1	0	1
43	175	32	0	1	1	0	0	1
43	177	13	0	1	1	0	0	1
43	177	33	0	1	1	0	0	1
43	178	25	0	1	1	0	0	1
43	182	8	0	1	1	0	0	1
43	184	36	0	1	1	0	0	1
43	185	16	0	1	1	0	0	1
43	201	40	0	1	1	0	0	1
43	206	40	0	1	1	0	0	1
43	208	32	0	1	1	0	0	1
44	4	12	1	2	3	1	1	0
44	21	34	1	2	3	0	0	0
45	8	40	0	1	1	1	0	1
45	31	34	0	1	1	1	0	1
45	36	25	0	1	1	1	0	1
45	43	39	0	1	1	1	1	1
45	50	7	0	1	1	1	0	1
45	60	42	0	1	1	1	0	1
45	61	41	0	1	1	1	0	1
45	64	20	0	1	1	1	0	1
45	67	11	0	1	1	1	0	1
45	70	33	0	1	1	1	1	1
45	73	9	0	1	1	1	0	1
45	75	37	0	1	1	1	0	1
45	89	14	0	1	1	1	0	1
45	94	15	0	1	1	1	0	1
45	136	28	0	1	1	1	0	1
45	139	20	0	1	1	1	0	1
45	143	27	0	1	1	1	0	1
45	150	20	0	1	1	1	0	1
45	154	22	0	1	1	1	0	1
45	158	23	0	1	1	1	0	1
45	162	16	0	1	1	1	0	1
45	164	42	0	1	1	1	0	1
45	193	2	0	1	1	1	0	1
45	229	20	0	1	1	1	0	1
45	252	35	0	1	1	1	0	1
45	273	24	0	1	1	1	0	1
45	307	33	0	1	1	0	0	1
45	308	14	0	1	1	0	0	1
45	309	11	0	1	1	0	0	1
45	310	24	0	1	1	0	0	1
45	311	37	0	1	1	0	0	1
45	313	38	0	1	1	0	0	1
45	314	32	0	1	1	0	0	1
45	315	18	0	1	1	0	0	1
45	315	42	0	1	1	0	0	1
45	316	37	0	1	1	0	0	1
45	318	32	0	1	1	0	0	1
45	325	38	0	1	1	0	0	1
45	329	37	0	1	1	0	0	1
45	330	38	0	1	1	0	1	1
45	336	40	0	1	1	0	0	1
45	340	30	0	1	1	0	0	1
45	346	30	0	1	1	0	1	1
45	349	37	0	1	1	0	0	1
45	350	41	0	1	1	0	0	1
45	351	36	0	1	1	0	0	1
45	361	42	0	1	1	0	0	1
45	365	42	0	1	1	0	0	1
45	368	40	0	1	1	0	0	1
46	7	22	0	2	3	1	0	0
46	11	33	0	2	3	1	0	0
46	17	35	0	2	3	0	0	0
47	9	35	0	1	3	1	0	0
47	33	26	0	1	3	0	0	0
47	37	37	0	1	3	0	0	0
47	38	42	0	1	3	0	0	0
47	39	31	0	1	3	0	0	0
47	41	39	0	1	3	0	0	0
47	45	36	0	1	3	0	0	0
48	2	28	0	1	3	1	0	1
48	6	26	0	1	3	1	0	1
48	12	25	0	1	3	1	0	1
48	15	13	0	1	3	1	0	1
48	15	35	0	1	3	1	0	1
48	30	22	0	1	3	1	0	1
48	48	19	0	1	3	1	0	1
48	48	41	0	1	3	1	1	1
48	52	22	0	1	3	1	0	1
48	54	26	0	1	3	1	0	1
48	65	27	0	1	3	1	0	1
48	78	25	0	1	3	1	0	1
48	82	23	0	1	3	1	1	1
48	89	22	0	1	3	0	0	1
48	93	15	0	1	3	0	0	1
48	93	36	0	1	3	0	0	1
48	98	25	0	1	3	0	0	1
48	99	26	0	1	3	0	0	1
48	101	35	0	1	3	0	0	1
48	105	34	0	1	3	0	0	1
49	15	14	0	2	1	1	0	1
49	15	40	0	2	1	1	0	1
49	17	9	0	2	1	1	0	1
49	17	35	0	2	1	1	0	1
49	19	10	0	2	1	1	0	1
49	27	38	0	2	1	1	0	1
49	34	38	0	2	1	1	0	1
49	117	25	0	2	1	1	0	1
49	135	42	0	2	1	1	0	1
49	140	31	0	2	1	1	0	1
49	181	26	0	2	1	1	0	1
49	183	28	0	2	1	1	0	1
49	184	38	0	2	1	1	0	1
49	251	25	0	2	1	1	0	1
49	257	33	0	2	1	0	0	1
49	259	39	0	2	1	0	0	1
49	260	41	0	2	1	0	0	1
49	261	15	0	2	1	0	0	1
49	262	10	0	2	1	0	0	1
49	262	41	0	2	1	0	0	1
49	265	41	0	2	1	0	0	1
49	269	16	0	2	1	0	0	1
49	273	27	0	2	1	0	0	1
49	274	15	0	2	1	0	0	1
49	277	24	0	2	1	0	0	1
49	281	33	0	2	1	0	0	1
49	285	24	0	2	1	0	0	1
49	287	29	0	2	1	0	0	1
49	288	35	0	2	1	0	0	1
50	3	14	0	1	1	1	0	1
50	22	34	0	1	1	1	0	1
50	33	26	0	1	1	1	0	1
50	53	36	0	1	1	1	0	1
50	70	7	0	1	1	1	0	1
50	75	22	0	1	1	1	0	1
50	94	17	0	1	1	1	0	1
50	97	11	0	1	1	1	0	1
50	98	12	0	1	1	1	0	1
50	99	9	0	1	1	1	0	1
50	101	30	0	1	1	1	0	1
50	103	34	0	1	1	1	0	1
50	108	29	0	1	1	1	0	1
50	110	25	0	1	1	1	0	1
50	111	34	0	1	1	1	0	1
50	137	25	0	1	1	1	0	1
50	148	14	0	1	1	1	0	1
50	148	14	0	1	1	1	0	1
50	154	33	0	1	1	1	0	1
50	157	30	0	1	1	0	0	1
50	161	42	0	1	1	0	0	1
50	166	29	0	1	1	0	0	1
50	168	40	0	1	1	0	0	1
50	169	34	0	1	1	0	0	1
50	170	26	0	1	1	0	0	1
50	181	40	0	1	1	0	0	1
50	190	42	0	1	1	0	0	1
51	6	19	0	1	3	1	0	0
51	6	33	0	1	3	1	0	0
51	7	22	0	1	3	1	0	0
51	18	33	0	1	3	1	0	0
51	19	11	0	1	3	1	0	0
51	19	38	0	1	3	1	0	0
51	22	30	0	1	3	1	0	0
51	23	13	0	1	3	1	0	0
51	23	36	0	1	3	1	0	0
51	43	33	0	1	3	1	0	0
51	49	28	0	1	3	1	0	0
51	56	33	0	1	3	1	0	0
51	66	18	0	1	3	0	0	0
51	70	41	0	1	3	0	0	0
51	73	42	0	1	3	0	0	0
52	3	42	0	1	1	1	0	1
52	15	34	0	1	1	1	0	1
52	36	11	0	1	1	1	0	1
52	40	24	0	1	1	1	0	1
52	43	37	0	1	1	1	0	1
52	51	42	0	1	1	1	0	1
52	99	35	0	1	1	1	0	1
52	109	24	0	1	1	1	0	1
52	116	32	0	1	1	1	0	1
52	118	26	0	1	1	1	0	1
52	119	27	0	1	1	1	0	1
52	120	37	0	1	1	1	0	1
52	153	24	0	1	1	1	0	1
52	157	26	0	1	1	0	0	1
52	161	16	0	1	1	0	1	1
52	161	16	0	1	1	0	1	1
52	161	29	0	1	1	0	0	1
52	165	31	0	1	1	0	0	1
52	171	30	0	1	1	0	0	1
52	172	22	0	1	1	0	0	1
52	177	39	0	1	1	0	0	1
52	181	39	0	1	1	0	0	1
52	182	40	0	1	1	0	0	1
52	183	42	0	1	1	0	0	1
53	18	23	0	1	3	1	0	0
53	25	10	0	1	3	0	0	0
53	25	42	0	1	3	0	0	0
53	25	42	0	1	3	0	0	0
53	29	40	0	1	3	0	0	0
54	7	5	0	1	3	1	0	0
54	7	24	0	1	3	1	0	0
54	11	10	0	1	3	1	0	0
54	13	18	0	1	3	1	0	0
54	19	27	0	1	3	1	0	0
54	31	20	0	1	3	1	0	0
54	33	10	0	1	3	1	1	0
54	35	34	0	1	3	1	0	0
54	36	22	0	1	3	1	0	0
54	36	40	0	1	3	1	1	0
54	39	15	0	1	3	1	0	0
54	49	38	0	1	3	1	0	0
54	56	17	0	1	3	1	0	0
54	59	25	0	1	3	1	0	0
54	64	23	0	1	3	1	0	0
54	66	12	0	1	3	1	0	0
54	73	24	0	1	3	1	0	0
54	80	26	0	1	3	1	0	0
54	80	26	0	1	3	1	0	0
54	87	22	0	1	3	1	0	0
54	94	26	0	1	3	1	0	0
54	100	12	0	1	3	1	0	0
54	113	17	0	1	3	0	0	0
54	113	39	0	1	3	0	0	0
54	125	29	0	1	3	0	0	0
54	126	39	0	1	3	0	0	0
54	127	28	0	1	3	0	0	0
54	133	37	0	1	3	0	0	0
54	140	40	0	1	3	0	0	0
55	3	15	1	1	2	1	0	0
55	8	27	1	1	2	1	0	0
55	10	16	1	1	2	1	0	0
55	13	35	1	1	2	1	0	0
55	15	28	1	1	2	1	0	0
55	17	19	1	1	2	1	0	0
55	27	30	1	1	2	1	0	0
55	49	30	1	1	2	1	0	0
55	52	10	1	1	2	1	0	0
55	57	35	1	1	2	1	0	0
55	59	41	1	1	2	1	0	0
55	87	37	1	1	2	1	0	0
55	91	34	1	1	2	1	0	0
55	96	14	1	1	2	1	0	0
55	97	11	1	1	2	1	1	0
55	97	27	1	1	2	1	0	0
55	105	18	1	1	2	1	0	0
55	109	41	1	1	2	1	0	0
55	110	20	1	1	2	1	0	0
55	113	23	1	1	2	1	0	0
55	115	21	1	1	2	1	0	0
55	117	24	1	1	2	1	0	0
55	120	23	1	1	2	1	0	0
55	124	27	1	1	2	1	0	0
55	134	24	1	1	2	1	0	0
55	156	11	1	1	2	1	0	0
55	163	20	1	1	2	1	0	0
55	167	1	1	1	2	1	0	0
55	180	23	1	1	2	1	1	0
55	207	20	1	1	2	1	0	0
55	211	17	1	1	2	1	0	0
55	213	17	1	1	2	1	0	0
55	228	26	1	1	2	1	0	0
55	234	13	1	1	2	0	0	0
55	237	21	1	1	2	0	0	0
55	237	41	1	1	2	0	0	0
55	240	28	1	1	2	0	0	0
55	241	17	1	1	2	0	0	0
55	241	37	1	1	2	0	0	0
55	242	16	1	1	2	0	0	0
55	244	26	1	1	2	0	0	0
55	245	20	1	1	2	0	0	0
55	246	22	1	1	2	0	1	0
55	247	25	1	1	2	0	0	0
55	249	40	1	1	2	0	0	0
55	250	25	1	1	2	0	0	0
55	251	24	1	1	2	0	0	0
55	259	30	1	1	2	0	0	0
55	261	39	1	1	2	0	0	0
55	262	39	1	1	2	0	0	0
55	263	27	1	1	2	0	0	0
55	265	31	1	1	2	0	0	0
55	266	34	1	1	2	0	0	0
55	267	30	1	1	2	0	0	0
55	269	33	1	1	2	0	0	0
55	273	35	1	1	2	0	0	0
55	274	33	1	1	2	0	0	0
55	275	34	1	1	2	0	0	0
55	278	36	1	1	2	0	0	0
56	4	28	0	1	1	1	1	0
56	18	17	0	1	1	1	0	0
56	28	28	0	1	1	1	0	0
56	44	33	0	1	1	1	0	0
56	77	15	0	1	1	1	0	0
56	152	32	0	1	1	1	0	0
56	160	22	0	1	1	1	0	0
56	171	24	0	1	1	1	0	0
56	177	32	0	1	1	0	0	0
56	180	31	0	1	1	0	0	0
56	181	35	0	1	1	0	0	0
56	186	19	0	1	1	0	0	0
56	187	33	0	1	1	0	0	0
57	20	35	1	1	1	1	0	1
57	66	21	1	1	1	1	0	1
57	72	35	1	1	1	1	0	1
57	79	39	1	1	1	1	0	1
57	85	18	1	1	1	0	0	1
57	98	36	1	1	1	0	1	1
58	52	25	0	2	1	1	0	1
58	53	25	0	2	1	1	0	1
58	58	27	0	2	1	1	0	1
58	120	17	0	2	1	1	0	1
58	129	18	0	2	1	1	0	1
58	137	23	0	2	1	1	0	1
58	156	12	0	2	1	1	0	1
58	222	41	0	2	1	1	0	1
58	224	35	0	2	1	1	0	1
58	234	34	0	2	1	1	0	1
58	244	15	0	2	1	1	0	1
58	249	16	0	2	1	1	0	1
58	259	17	0	2	1	1	0	1
58	276	27	0	2	1	1	0	1
58	314	27	0	2	1	1	0	1
58	337	19	0	2	1	1	0	1
58	341	32	0	2	1	1	0	1
58	346	42	0	2	1	1	0	1
58	354	24	0	2	1	1	0	1
58	357	23	0	2	1	1	1	1
58	361	14	0	2	1	0	0	1
58	361	34	0	2	1	0	0	1
58	362	17	0	2	1	0	0	1
58	363	24	0	2	1	0	0	1
58	364	29	0	2	1	0	0	1
58	365	31	0	2	1	0	0	1
58	366	36	0	2	1	0	0	1
58	367	24	0	2	1	0	0	1
58	368	36	0	2	1	0	0	1
58	369	19	0	2	1	0	0	1
58	371	25	0	2	1	0	0	1
58	372	40	0	2	1	0	0	1
58	375	33	0	2	1	0	0	1
58	376	33	0	2	1	0	0	1
58	377	27	0	2	1	0	0	1
58	378	29	0	2	1	0	0	1
58	381	31	0	2	1	0	0	1
58	382	29	0	2	1	0	0	1
58	385	23	0	2	1	0	0	1
58	398	32	0	2	1	0	0	1
58	399	40	0	2	1	0	0	1
59	37	21	1	1	1	1	0	1
59	47	15	1	1	1	1	0	1
59	48	30	1	1	1	1	1	1
59	65	11	1	1	1	0	0	1
59	69	16	1	1	1	0	0	1
59	73	27	1	1	1	0	0	1
59	81	37	1	1	1	0	0	1
60	48	13	0	2	1	1	0	1
60	53	14	0	2	1	1	0	1
60	57	12	0	2	1	1	0	1
60	95	17	0	2	1	1	0	1
60	97	20	0	2	1	1	0	1
60	112	17	0	2	1	1	0	1
60	116	14	0	2	1	1	0	1
60	118	12	0	2	1	1	0	1
60	119	19	0	2	1	1	0	1
60	126	23	0	2	1	1	0	1
60	165	33	0	2	1	0	0	1
60	170	30	0	2	1	0	0	1
60	171	30	0	2	1	0	0	1
60	173	13	0	2	1	0	0	1
60	177	19	0	2	1	0	0	1
60	177	42	0	2	1	0	0	1
60	181	40	0	2	1	0	0	1
60	182	27	0	2	1	0	0	1
60	184	31	0	2	1	0	0	1
60	189	29	0	2	1	0	0	1
60	190	29	0	2	1	0	0	1
60	201	39	0	2	1	0	1	1
61	17	25	1	1	1	1	0	1
61	20	38	1	1	1	1	0	1
61	20	42	1	1	1	1	0	1
61	54	24	1	1	1	1	1	1
61	100	42	1	1	1	1	0	1
61	106	15	1	1	1	1	0	1
61	106	42	1	1	1	1	0	1
61	115	19	1	1	1	1	0	1
61	115	37	1	1	1	1	0	1
61	118	23	1	1	1	1	0	1
61	119	31	1	1	1	1	0	1
61	122	27	1	1	1	1	0	1
61	134	10	1	1	1	1	0	1
61	173	16	1	1	1	1	0	1
61	182	21	1	1	1	1	0	1
61	188	22	1	1	1	1	0	1
61	190	36	1	1	1	1	0	1
61	194	17	1	1	1	1	0	1
61	205	25	1	1	1	1	0	1
61	226	31	1	1	1	0	0	1
61	233	33	1	1	1	0	0	1
61	236	19	1	1	1	0	0	1
61	237	31	1	1	1	0	0	1
61	240	27	1	1	1	0	0	1
61	242	16	1	1	1	0	0	1
61	242	38	1	1	1	0	0	1
61	243	25	1	1	1	0	0	1
61	246	13	1	1	1	0	0	1
61	247	16	1	1	1	0	0	1
61	249	39	1	1	1	0	0	1
61	251	22	1	1	1	0	0	1
61	297	21	1	1	1	0	0	1
61	301	38	1	1	1	0	0	1
61	305	26	1	1	1	0	0	1
61	311	29	1	1	1	0	0	1
61	313	34	1	1	1	0	0	1
61	317	40	1	1	1	0	0	1
61	321	40	1	1	1	0	0	1
62	6	42	1	1	3	1	0	0
62	12	14	1	1	3	1	0	0
62	15	13	1	1	3	1	0	0
62	18	31	1	1	3	1	0	0
62	25	25	1	1	3	1	0	0
62	32	22	1	1	3	1	0	0
62	37	32	1	1	3	1	0	0
62	40	19	1	1	3	1	1	0
62	40	29	1	1	3	1	0	0
62	45	29	1	1	3	1	0	0
62	50	42	1	1	3	1	0	0
62	54	12	1	1	3	1	0	0
62	59	17	1	1	3	1	0	0
62	62	26	1	1	3	1	0	0
62	68	10	1	1	3	1	0	0
62	68	10	1	1	3	1	0	0
62	96	29	1	1	3	1	0	0
62	107	30	1	1	3	1	0	0
62	117	15	1	1	3	0	0	0
62	117	35	1	1	3	0	0	0
62	118	18	1	1	3	0	0	0
62	121	25	1	1	3	0	0	0
62	123	29	1	1	3	0	0	0
62	125	36	1	1	3	0	1	0
63	25	33	1	1	1	1	0	0
63	28	24	1	1	1	1	0	0
63	35	34	1	1	1	1	0	0
63	42	31	1	1	1	1	0	0
63	54	21	1	1	1	1	0	0
63	58	18	1	1	1	1	0	0
63	62	17	1	1	1	1	0	0
63	62	17	1	1	1	1	0	0
63	71	31	1	1	1	1	0	0
63	86	37	1	1	1	1	0	0
63	108	23	1	1	1	1	0	0
63	109	33	1	1	1	1	0	0
63	149	6	1	1	1	0	0	0
63	150	11	1	1	1	0	1	0
63	151	24	1	1	1	0	1	0
63	151	40	1	1	1	0	0	0
63	154	19	1	1	1	0	1	0
63	154	31	1	1	1	0	0	0
63	171	33	1	1	1	0	0	0
63	197	42	1	1	1	0	0	0
63	201	37	1	1	1	0	0	0
64	3	31	1	1	1	1	1	0
64	46	33	1	1	1	0	0	0
65	3	17	1	1	1	1	0	0
65	7	19	1	1	1	1	0	0
65	14	16	1	1	1	1	0	0
65	19	28	1	1	1	1	0	0
65	24	9	1	1	1	1	0	0
65	24	27	1	1	1	1	0	0
65	46	23	1	1	1	1	0	0
65	49	28	1	1	1	1	0	0
65	51	27	1	1	1	1	1	0
65	85	24	1	1	1	1	0	0
65	88	31	1	1	1	1	0	0
65	89	16	1	1	1	1	0	0
65	116	15	1	1	1	0	0	0
65	117	14	1	1	1	0	0	0
65	117	38	1	1	1	0	0	0
65	118	19	1	1	1	0	0	0
65	119	26	1	1	1	0	0	0
65	120	19	1	1	1	0	0	0
65	125	26	1	1	1	0	0	0
66	4	22	0	2	2	1	0	0
66	11	10	0	2	2	1	0	0
66	13	23	0	2	2	1	0	0
66	28	16	0	2	2	1	1	0
66	28	35	0	2	2	1	0	0
66	35	18	0	2	2	1	0	0
66	38	35	0	2	2	1	0	0
66	45	29	0	2	2	1	0	0
66	46	15	0	2	2	1	0	0
66	46	40	0	2	2	1	0	0
66	51	10	0	2	2	1	0	0
66	54	19	0	2	2	1	0	0
66	59	21	0	2	2	1	0	0
66	60	29	0	2	2	1	0	0
66	69	22	0	2	2	0	0	0
66	245	22	0	2	2	0	0	0
66	248	40	0	2	2	0	0	0
66	253	28	0	2	2	0	0	0
67	3	37	1	1	1	1	0	1
67	7	24	1	1	1	1	0	1
67	11	24	1	1	1	1	0	1
67	30	21	1	1	1	1	0	1
67	36	38	1	1	1	1	0	1
67	47	15	1	1	1	1	0	1
67	49	23	1	1	1	1	0	1
67	61	33	1	1	1	1	0	1
67	75	11	1	1	1	1	0	1
67	81	42	1	1	1	1	0	1
67	83	20	1	1	1	1	0	1
67	85	23	1	1	1	1	0	1
67	104	33	1	1	1	1	0	1
67	110	31	1	1	1	1	0	1
67	120	20	1	1	1	1	0	1
67	120	32	1	1	1	1	0	1
67	121	29	1	1	1	1	0	1
67	123	15	1	1	1	1	1	1
67	123	40	1	1	1	1	0	1
67	126	11	1	1	1	1	0	1
67	149	20	1	1	1	1	0	1
67	153	25	1	1	1	1	0	1
67	158	18	1	1	1	1	0	1
67	199	16	1	1	1	1	0	1
67	311	42	1	1	1	1	0	1
67	314	28	1	1	1	1	0	1
67	317	34	1	1	1	1	0	1
67	319	34	1	1	1	1	0	1
67	321	38	1	1	1	1	0	1
67	328	12	1	1	1	1	0	1
67	329	37	1	1	1	1	0	1
67	330	16	1	1	1	1	0	1
67	334	11	1	1	1	1	0	1
67	334	39	1	1	1	1	0	1
67	337	25	1	1	1	1	0	1
67	367	38	1	1	1	1	0	1
67	370	36	1	1	1	1	0	1
67	380	20	1	1	1	1	0	1
67	388	31	1	1	1	1	0	1
67	396	16	1	1	1	1	0	1
67	399	24	1	1	1	1	0	1
67	411	12	1	1	1	1	0	1
67	417	11	1	1	1	1	0	1
67	438	16	1	1	1	1	0	1
67	476	13	1	1	1	1	0	1
67	485	15	1	1	1	1	0	1
67	492	17	1	1	1	1	0	1
67	505	10	1	1	1	0	0	1
67	505	31	1	1	1	0	0	1
67	507	40	1	1	1	0	0	1
67	508	15	1	1	1	0	0	1
67	508	35	1	1	1	0	0	1
67	509	18	1	1	1	0	0	1
67	510	23	1	1	1	0	0	1
67	511	19	1	1	1	0	0	1
67	513	15	1	1	1	0	0	1
67	513	40	1	1	1	0	0	1
67	517	22	1	1	1	0	0	1
67	518	34	1	1	1	0	0	1
67	520	18	1	1	1	0	0	1
67	522	36	1	1	1	0	0	1
67	525	21	1	1	1	0	0	1
67	529	36	1	1	1	0	0	1
67	530	25	1	1	1	0	0	1
67	532	41	1	1	1	0	1	1
67	535	28	1	1	1	0	0	1
67	536	24	1	1	1	0	0	1
67	537	22	1	1	1	0	1	1
67	537	22	1	1	1	0	1	1
67	537	42	1	1	1	0	0	1
67	555	37	1	1	1	0	0	1
67	564	40	1	1	1	0	0	1
68	6	12	1	1	1	1	0	1
68	6	38	1	1	1	1	0	1
68	11	12	1	1	1	1	0	1
68	16	21	1	1	1	1	0	1
68	43	19	1	1	1	1	0	1
68	46	21	1	1	1	1	0	1
68	53	33	1	1	1	1	0	1
68	71	33	1	1	1	1	0	1
68	76	19	1	1	1	1	0	1
68	77	11	1	1	1	1	0	1
68	77	27	1	1	1	1	0	1
68	82	34	1	1	1	1	0	1
68	86	21	1	1	1	1	0	1
68	93	14	1	1	1	1	0	1
68	93	32	1	1	1	1	0	1
68	104	28	1	1	1	1	0	1
68	112	32	1	1	1	1	0	1
68	124	35	1	1	1	1	0	1
68	127	10	1	1	1	1	0	1
68	137	38	1	1	1	1	0	1
68	138	14	1	1	1	1	0	1
68	139	17	1	1	1	1	0	1
68	140	34	1	1	1	1	0	1
68	141	32	1	1	1	1	0	1
68	144	19	1	1	1	1	0	1
68	145	33	1	1	1	1	0	1
68	153	17	1	1	1	0	0	1
68	154	20	1	1	1	0	0	1
68	154	33	1	1	1	0	0	1
68	157	14	1	1	1	0	0	1
68	161	20	1	1	1	0	0	1
68	161	41	1	1	1	0	0	1
68	169	24	1	1	1	0	0	1
69	43	28	1	1	3	1	0	0
69	44	35	1	1	3	1	0	0
69	62	35	1	1	3	1	0	0
69	84	28	1	1	3	1	1	0
69	85	18	1	1	3	1	0	0
69	86	14	1	1	3	1	0	0
69	96	21	1	1	3	1	0	0
69	107	9	1	1	3	1	0	0
69	114	22	1	1	3	1	0	0
69	117	11	1	1	3	1	0	0
69	119	12	1	1	3	1	0	0
69	127	17	1	1	3	1	1	0
69	128	21	1	1	3	1	0	0
69	154	23	1	1	3	1	1	0
69	158	8	1	1	3	1	0	0
69	179	32	1	1	3	1	0	0
69	182	16	1	1	3	1	0	0
69	182	28	1	1	3	1	0	0
69	203	31	1	1	3	1	0	0
69	204	21	1	1	3	1	1	0
69	206	27	1	1	3	1	1	0
69	224	29	1	1	3	1	0	0
69	225	32	1	1	3	1	0	0
69	247	25	1	1	3	1	0	0
69	265	18	1	1	3	1	0	0
69	267	18	1	1	3	1	0	0
69	269	32	1	1	3	0	0	0
69	271	14	1	1	3	0	0	0
69	271	38	1	1	3	0	0	0
69	272	10	1	1	3	0	0	0
69	273	17	1	1	3	0	0	0
69	277	32	1	1	3	0	0	0
69	281	35	1	1	3	0	0	0
69	282	28	1	1	3	0	0	0
69	283	41	1	1	3	0	0	0
69	284	27	1	1	3	0	0	0
69	285	28	1	1	3	0	0	0
69	286	28	1	1	3	0	0	0
69	289	27	1	1	3	0	0	0
69	313	38	1	1	3	0	0	0
70	12	30	1	1	1	1	0	1
70	17	25	1	1	1	1	0	1
70	44	21	1	1	1	1	0	1
70	61	12	1	1	1	1	0	1
70	66	12	1	1	1	1	1	1
70	77	10	1	1	1	1	0	1
70	94	32	1	1	1	1	0	1
70	104	24	1	1	1	1	0	1
70	119	31	1	1	1	1	0	1
70	127	16	1	1	1	1	0	1
70	151	19	1	1	1	1	0	1
70	162	23	1	1	1	1	0	1
70	166	31	1	1	1	1	0	1
70	167	21	1	1	1	1	0	1
70	177	41	1	1	1	1	0	1
70	188	30	1	1	1	1	0	1
70	206	23	1	1	1	1	0	1
70	206	41	1	1	1	1	0	1
70	230	23	1	1	1	1	0	1
70	230	36	1	1	1	1	0	1
70	241	16	1	1	1	0	0	1
70	241	42	1	1	1	0	0	1
70	242	13	1	1	1	0	0	1
70	243	14	1	1	1	0	0	1
70	243	34	1	1	1	0	0	1
70	244	10	1	1	1	0	0	1
70	244	26	1	1	1	0	0	1
70	244	42	1	1	1	0	0	1
70	246	11	1	1	1	0	0	1
70	247	13	1	1	1	0	0	1
70	254	35	1	1	1	0	0	1
70	255	18	1	1	1	0	0	1
70	256	18	1	1	1	0	0	1
70	257	19	1	1	1	0	0	1
70	261	37	1	1	1	0	0	1
70	265	25	1	1	1	0	0	1
70	268	33	1	1	1	0	0	1
71	1	37	0	1	2	1	0	0
71	7	30	0	1	2	1	0	0
71	8	42	0	1	2	1	0	0
71	9	40	0	1	2	1	0	0
71	11	26	0	1	2	1	0	0
71	18	22	0	1	2	1	0	0
72	5	10	1	2	1	1	0	0
72	15	27	1	2	1	1	0	0
72	20	17	1	2	1	1	0	0
72	37	30	1	2	1	1	0	0
72	41	25	1	2	1	1	0	0
72	44	40	1	2	1	1	0	0
72	57	20	1	2	1	1	0	0
72	58	31	1	2	1	1	0	0
72	70	30	1	2	1	1	0	0
72	71	33	1	2	1	1	0	0
72	79	11	1	2	1	1	0	0
72	89	31	1	2	1	1	0	0
72	105	29	1	2	1	1	0	0
72	119	27	1	2	1	1	0	0
72	122	27	1	2	1	1	0	0
72	127	10	1	2	1	1	0	0
72	138	19	1	2	1	1	0	0
72	139	13	1	2	1	1	0	0
72	140	10	1	2	1	1	1	0
72	150	27	1	2	1	0	0	0
72	153	29	1	2	1	0	0	0
72	189	20	1	2	1	0	0	0
72	193	33	1	2	1	0	0	0
72	197	26	1	2	1	0	0	0
72	209	42	1	2	1	0	0	0
72	211	42	1	2	1	0	0	0
73	2	31	0	2	1	1	0	1
73	7	35	0	2	1	1	0	1
73	15	18	0	2	1	1	0	1
73	17	35	0	2	1	1	0	1
73	26	19	0	2	1	1	0	1
73	39	41	0	2	1	1	0	1
73	49	24	0	2	1	1	0	1
73	82	7	0	2	1	1	0	1
73	82	40	0	2	1	1	0	1
73	110	18	0	2	1	1	0	1
73	110	42	0	2	1	1	0	1
73	128	15	0	2	1	1	0	1
73	137	13	0	2	1	1	0	1
73	148	30	0	2	1	1	0	1
73	150	38	0	2	1	1	0	1
73	182	5	0	2	1	1	0	1
73	182	30	0	2	1	1	0	1
73	214	18	0	2	1	0	0	1
73	216	24	0	2	1	0	0	1
73	221	28	0	2	1	0	0	1
73	222	24	0	2	1	0	0	1
73	225	18	0	2	1	0	0	1
73	230	27	0	2	1	0	0	1
73	231	34	0	2	1	0	0	1
73	232	42	0	2	1	0	0	1
73	233	36	0	2	1	0	0	1
73	235	35	0	2	1	0	0	1
73	241	36	0	2	1	0	0	1
73	242	37	0	2	1	0	0	1
73	246	34	0	2	1	0	0	1
73	250	39	0	2	1	0	0	1
73	250	39	0	2	1	0	0	1
74	5	14	1	1	1	1	1	1
74	5	29	1	1	1	1	0	1
74	9	29	1	1	1	1	0	1
74	21	40	1	1	1	1	0	1
74	33	17	1	1	1	1	1	1
74	41	21	1	1	1	1	0	1
74	52	18	1	1	1	1	0	1
74	57	20	1	1	1	1	0	1
74	83	19	1	1	1	1	1	1
74	83	19	1	1	1	1	1	1
74	88	35	1	1	1	1	1	1
74	97	34	1	1	1	1	0	1
74	113	26	1	1	1	1	0	1
74	122	39	1	1	1	1	0	1
74	133	13	1	1	1	0	0	1
74	133	42	1	1	1	0	0	1
74	135	16	1	1	1	0	0	1
74	138	28	1	1	1	0	0	1
74	138	37	1	1	1	0	0	1
74	141	22	1	1	1	0	0	1
74	142	29	1	1	1	0	0	1
74	143	33	1	1	1	0	0	1
74	145	19	1	1	1	0	0	1
74	149	22	1	1	1	0	0	1
74	149	36	1	1	1	0	0	1
74	155	25	1	1	1	0	0	1
74	161	42	1	1	1	0	0	1
75	12	21	1	1	2	1	0	0
75	20	40	1	1	2	1	0	0
75	27	30	1	1	2	1	0	0
75	29	40	1	1	2	1	0	0
75	35	14	1	1	2	1	0	0
75	35	41	1	1	2	1	0	0
75	36	32	1	1	2	1	0	0
75	37	25	1	1	2	0	0	0
75	41	24	1	1	2	0	0	0
75	45	40	1	1	2	0	0	0
75	49	32	1	1	2	0	0	0
75	53	31	1	1	2	0	0	0
75	54	31	1	1	2	0	0	0
75	57	41	1	1	2	0	0	0
76	59	27	1	1	1	1	0	1
76	60	30	1	1	1	1	0	1
76	72	12	1	1	1	1	0	1
76	72	35	1	1	1	1	0	1
76	85	15	1	1	1	1	0	1
76	87	26	1	1	1	1	0	1
76	109	28	1	1	1	1	1	1
76	128	21	1	1	1	1	0	1
76	128	42	1	1	1	1	0	1
76	129	30	1	1	1	1	0	1
76	145	26	1	1	1	1	0	1
76	150	30	1	1	1	1	0	1
76	165	23	1	1	1	1	0	1
76	169	20	1	1	1	1	0	1
76	173	9	1	1	1	0	0	1
76	173	32	1	1	1	0	0	1
76	177	10	1	1	1	0	0	1
76	181	15	1	1	1	0	0	1
76	182	15	1	1	1	0	0	1
76	187	29	1	1	1	0	0	1
76	188	28	1	1	1	0	0	1
76	193	39	1	1	1	0	0	1
77	8	12	0	1	3	1	0	0
77	8	39	0	1	3	1	0	0
77	14	22	0	1	3	1	0	0
77	16	16	0	1	3	1	1	0
77	27	23	0	1	3	1	1	0
78	6	30	1	2	2	1	0	0
78	8	17	1	2	2	1	0	0
79	17	28	1	2	1	1	0	1
79	20	34	1	2	1	1	0	1
79	22	20	1	2	1	1	0	1
79	23	21	1	2	1	1	0	1
79	27	15	1	2	1	1	0	1
79	47	34	1	2	1	1	0	1
79	48	23	1	2	1	1	0	1
79	50	28	1	2	1	1	0	1
79	53	33	1	2	1	1	0	1
79	56	36	1	2	1	1	0	1
79	67	39	1	2	1	1	0	1
79	68	23	1	2	1	1	0	1
79	83	24	1	2	1	1	0	1
79	85	16	1	2	1	1	0	1
79	90	27	1	2	1	1	0	1
79	100	26	1	2	1	0	0	1
79	102	30	1	2	1	0	0	1
79	103	32	1	2	1	0	0	1
79	105	22	1	2	1	0	0	1
79	109	30	1	2	1	0	0	1
79	110	39	1	2	1	0	0	1
79	113	26	1	2	1	0	0	1
79	114	33	1	2	1	0	0	1
79	117	24	1	2	1	0	0	1
79	121	36	1	2	1	0	0	1
79	122	27	1	2	1	0	0	1
79	126	34	1	2	1	0	0	1
80	6	30	1	2	2	1	0	0
81	4	21	1	1	1	1	0	1
81	5	34	1	1	1	1	0	1
81	18	31	1	1	1	1	0	1
81	37	17	1	1	1	1	0	1
81	37	39	1	1	1	1	0	1
81	46	10	1	1	1	1	0	1
81	46	30	1	1	1	1	0	1
81	47	35	1	1	1	1	0	1
81	57	37	1	1	1	1	0	1
81	59	22	1	1	1	1	0	1
81	65	21	1	1	1	1	0	1
81	72	24	1	1	1	1	0	1
81	85	12	1	1	1	1	0	1
81	88	24	1	1	1	1	0	1
81	108	10	1	1	1	1	1	1
81	108	29	1	1	1	1	1	1
81	109	11	1	1	1	1	0	1
81	117	30	1	1	1	1	0	1
81	119	22	1	1	1	1	0	1
81	144	39	1	1	1	1	1	1
81	149	15	1	1	1	0	0	1
81	149	41	1	1	1	0	0	1
81	151	10	1	1	1	0	0	1
81	151	31	1	1	1	0	0	1
81	237	13	1	1	1	0	0	1
81	238	24	1	1	1	0	0	1
81	242	39	1	1	1	0	1	1
81	246	31	1	1	1	0	0	1
81	251	28	1	1	1	0	0	1
81	257	40	1	1	1	0	0	1
82	14	19	0	1	1	1	0	0
82	46	23	0	1	1	1	0	0
82	55	24	0	1	1	1	0	0
82	61	21	0	1	1	1	0	0
82	64	9	0	1	1	1	0	0
82	80	15	0	1	1	1	0	0
82	82	11	0	1	1	1	0	0
82	85	32	0	1	1	1	0	0
82	94	19	0	1	1	1	0	0
82	123	26	0	1	1	1	0	0
82	133	34	0	1	1	0	0	0
82	134	24	0	1	1	0	0	0
82	135	13	0	1	1	0	0	0
82	135	31	0	1	1	0	0	0
82	294	37	0	1	1	0	0	0
82	297	36	0	1	1	0	0	0
83	6	37	0	1	1	1	0	0
83	11	37	0	1	1	1	0	0
83	12	41	0	1	1	1	0	0
83	29	25	0	1	1	1	0	0
83	30	13	0	1	1	1	0	0
83	31	22	0	1	1	1	0	0
83	35	20	0	1	1	1	0	0
83	36	21	0	1	1	1	0	0
83	38	9	0	1	1	1	0	0
83	38	32	0	1	1	1	0	0
83	40	10	0	1	1	1	0	0
83	41	18	0	1	1	1	0	0
83	42	18	0	1	1	1	0	0
83	45	17	0	1	1	1	0	0
83	45	39	0	1	1	1	0	0
83	79	39	0	1	1	1	0	0
83	81	17	0	1	1	1	0	0
83	91	33	0	1	1	1	0	0
83	124	17	0	1	1	1	0	0
83	141	19	0	1	1	1	0	0
83	166	24	0	1	1	1	0	0
83	167	31	0	1	1	1	0	0
83	199	16	0	1	1	1	0	0
83	252	39	0	1	1	1	0	0
83	276	16	0	1	1	1	0	0
83	278	14	0	1	1	1	0	0
83	286	13	0	1	1	1	0	0
83	292	28	0	1	1	0	0	0
83	297	17	0	1	1	0	0	0
83	298	18	0	1	1	0	0	0
83	298	40	0	1	1	0	0	0
83	303	29	0	1	1	0	1	0
83	304	29	0	1	1	0	0	0
83	305	33	0	1	1	0	0	0
83	307	29	0	1	1	0	0	0
83	308	27	0	1	1	0	0	0
83	313	38	0	1	1	0	0	0
83	314	28	0	1	1	0	1	0
83	318	42	0	1	1	0	0	0
83	321	39	0	1	1	0	0	0
83	322	40	0	1	1	0	0	0
84	3	18	0	1	3	1	0	0
84	6	19	0	1	3	1	1	0
84	21	15	0	1	3	1	0	0
84	24	30	0	1	3	1	0	0
84	27	30	0	1	3	1	0	0
84	36	11	0	1	3	1	0	0
84	40	13	0	1	3	1	0	0
84	43	11	0	1	3	1	0	0
84	46	12	0	1	3	1	0	0
84	47	12	0	1	3	1	0	0
84	48	17	0	1	3	1	0	0
84	53	18	0	1	3	1	0	0
84	53	37	0	1	3	1	0	0
84	55	29	0	1	3	1	0	0
84	66	21	0	1	3	1	0	0
84	68	26	0	1	3	1	0	0
84	87	15	0	1	3	1	0	0
84	87	37	0	1	3	1	0	0
84	97	9	0	1	3	1	0	0
84	98	28	0	1	3	1	0	0
84	111	21	0	1	3	0	0	0
84	113	21	0	1	3	0	0	0
84	114	24	0	1	3	0	0	0
84	117	25	0	1	3	0	0	0
84	121	27	0	1	3	0	0	0
84	122	30	0	1	3	0	0	0
84	123	31	0	1	3	0	0	0
84	126	30	0	1	3	0	0	0
84	127	33	0	1	3	0	0	0
85	4	22	1	2	1	1	0	1
85	37	28	1	2	1	1	0	1
85	46	15	1	2	1	1	1	1
85	53	26	1	2	1	1	0	1
85	71	12	1	2	1	1	0	1
85	76	17	1	2	1	1	0	1
85	86	29	1	2	1	1	0	1
85	89	22	1	2	1	1	0	1
85	93	16	1	2	1	1	0	1
85	100	20	1	2	1	1	0	1
85	110	27	1	2	1	1	0	1
85	113	22	1	2	1	1	0	1
85	114	38	1	2	1	1	0	1
85	120	31	1	2	1	1	0	1
85	126	14	1	2	1	1	0	1
85	126	41	1	2	1	1	0	1
85	130	39	1	2	1	1	0	1
85	134	17	1	2	1	1	0	1
85	140	34	1	2	1	1	0	1
85	145	34	1	2	1	1	0	1
85	146	35	1	2	1	1	0	1
85	147	21	1	2	1	1	0	1
85	148	26	1	2	1	1	0	1
85	158	28	1	2	1	1	0	1
85	172	35	1	2	1	1	0	1
85	177	17	1	2	1	1	0	1
85	177	40	1	2	1	1	0	1
85	182	36	1	2	1	1	0	1
85	184	31	1	2	1	1	0	1
85	192	26	1	2	1	1	0	1
85	210	10	1	2	1	1	0	1
85	212	15	1	2	1	1	0	1
85	212	29	1	2	1	1	0	1
85	215	15	1	2	1	0	0	1
85	216	16	1	2	1	0	0	1
85	217	13	1	2	1	0	0	1
85	217	31	1	2	1	0	0	1
85	218	12	1	2	1	0	0	1
85	219	8	1	2	1	0	0	1
85	219	29	1	2	1	0	0	1
85	222	30	1	2	1	0	0	1
85	225	18	1	2	1	0	0	1
85	226	40	1	2	1	0	0	1
85	227	30	1	2	1	0	0	1
85	228	26	1	2	1	0	0	1
85	229	33	1	2	1	0	0	1
85	230	34	1	2	1	0	1	1
85	231	29	1	2	1	0	0	1
85	233	21	1	2	1	0	0	1
85	235	33	1	2	1	0	0	1
85	238	23	1	2	1	0	0	1
85	243	38	1	2	1	0	0	1
85	245	30	1	2	1	0	0	1
85	246	41	1	2	1	0	0	1
85	251	41	1	2	1	0	0	1
85	254	42	1	2	1	0	0	1
86	5	28	0	1	1	1	0	1
86	17	23	0	1	1	1	0	1
86	24	13	0	1	1	1	0	1
86	24	37	0	1	1	1	0	1
86	26	40	0	1	1	1	0	1
86	31	40	0	1	1	1	0	1
86	33	28	0	1	1	1	0	1
86	45	13	0	1	1	1	0	1
86	108	31	0	1	1	1	1	1
86	112	15	0	1	1	1	0	1
86	115	24	0	1	1	1	0	1
86	152	12	0	1	1	1	0	1
86	172	33	0	1	1	1	0	1
86	199	13	0	1	1	1	0	1
[truncated: 8,797 more rows]
